# Supplementary material for: Effects of monocropping soil on plant growth and rhizosphere microbial community structure of Salvia miltiorrhiza Bge
Source: PeerJ. 2025 Nov 28;13:e20379. doi: 10.7717/peerj.20379 (PMC12667696; doi:10.7717/peerj.20379)
Supplement: Supplemental Information 5 [file peerj-13-20379-s005.xlsx]

## Sheet: otu_table_group.g.relative
Taxonomy	NS	MS	Tax_detail
Lecythophora	0.233429	0.164647	k__Fungi;p__Ascomycota;c__Sordariomycetes;o__Coniochaetales;f__Coniochaetaceae;g__Lecythophora;
Mortierella	0.088437	0.199734	k__Fungi;p__Mortierellomycota;c__Mortierellomycetes;o__Mortierellales;f__Mortierellaceae;g__Mortierella;
Thelephora	0.044941	0.000571	k__Fungi;p__Basidiomycota;c__Agaricomycetes;o__Thelephorales;f__Thelephoraceae;g__Thelephora;
Arthrobotrys	0.102909	0.060479	k__Fungi;p__Ascomycota;c__Orbiliomycetes;o__Orbiliales;f__Orbiliaceae;g__Arthrobotrys;
Lophotrichus	0.002372	0.074054	k__Fungi;p__Ascomycota;c__Sordariomycetes;o__Microascales;f__Microascaceae;g__Lophotrichus;
Cladosporium	0.080379	0.01095	k__Fungi;p__Ascomycota;c__Dothideomycetes;o__Capnodiales;f__Cladosporiaceae;g__Cladosporium;
Penicillium	0.024563	0.039318	k__Fungi;p__Ascomycota;c__Eurotiomycetes;o__Eurotiales;f__Aspergillaceae;g__Penicillium;
Aspergillus	0.038295	0.005475	k__Fungi;p__Ascomycota;c__Eurotiomycetes;o__Eurotiales;f__Aspergillaceae;g__Aspergillus;
Archaeorhizomyces	0.012624	0.000364	k__Fungi;p__Ascomycota;c__Archaeorhizomycetes;o__Archaeorhizomycetales;f__Archaeorhizomycetaceae;g__Archaeorhizomyces;
Conocybe	0.003403	0.035919	k__Fungi;p__Basidiomycota;c__Agaricomycetes;o__Agaricales;f__Bolbitiaceae;g__Conocybe;
Rhizophlyctis	0.000279	0.010219	k__Fungi;p__Chytridiomycota;c__Rhizophlyctidomycetes;o__Rhizophlyctidales;f__Rhizophlyctidaceae;g__Rhizophlyctis;
Aniptodera	0.025143	0.013068	k__Fungi;p__Ascomycota;c__Sordariomycetes;o__Microascales;f__Halosphaeriaceae;g__Aniptodera;
Coniothyrium	0.000495	0.008866	k__Fungi;p__Ascomycota;c__Dothideomycetes;o__Pleosporales;f__Coniothyriaceae;g__Coniothyrium;
Humicola	0.027126	0.026394	k__Fungi;p__Ascomycota;c__Sordariomycetes;o__Sordariales;f__Chaetomiaceae;g__Humicola;
Fusarium	0.03058	0.029206	k__Fungi;p__Ascomycota;c__Sordariomycetes;o__Hypocreales;f__Nectriaceae;g__Fusarium;
Alternaria	0.000554	0.006371	k__Fungi;p__Ascomycota;c__Dothideomycetes;o__Pleosporales;f__Pleosporaceae;g__Alternaria;
Solicoccozyma	0.011529	0.021693	k__Fungi;p__Basidiomycota;c__Tremellomycetes;o__Filobasidiales;f__Piskurozymaceae;g__Solicoccozyma;
Geomyces	0.017296	0.009885	k__Fungi;p__Ascomycota;c__Leotiomycetes;o__Thelebolales;f__Pseudeurotiaceae;g__Geomyces;
Diaporthe	4.7e-05	0.004173	k__Fungi;p__Ascomycota;c__Sordariomycetes;o__Diaporthales;f__Diaporthaceae;g__Diaporthe;
Gibberella	0.016518	0.010007	k__Fungi;p__Ascomycota;c__Sordariomycetes;o__Hypocreales;f__Nectriaceae;g__Gibberella;
Chaetomium	0.00405	0.016036	k__Fungi;p__Ascomycota;c__Sordariomycetes;o__Sordariales;f__Chaetomiaceae;g__Chaetomium;
Macroventuria	0.011863	0.006519	k__Fungi;p__Ascomycota;c__Dothideomycetes;o__Pleosporales;f__Didymellaceae;g__Macroventuria;
Eurotium	0.00671	0.000203	k__Fungi;p__Ascomycota;c__Eurotiomycetes;o__Eurotiales;f__Aspergillaceae;g__Eurotium;
unidentified	0.002909	5.5e-05	k__Fungi;p__Ascomycota;c__Leotiomycetes;o__Helotiales;f__Hyaloscyphaceae;g__unidentified;
Coprinopsis	0.002566	3e-05	k__Fungi;p__Basidiomycota;c__Agaricomycetes;o__Agaricales;f__Psathyrellaceae;g__Coprinopsis;
Plectosphaerella	0.007115	0.007572	k__Fungi;p__Ascomycota;c__Sordariomycetes;o__Glomerellales;f__Plectosphaerellaceae;g__Plectosphaerella;
Stegocintractia	0.00493	0.003344	k__Fungi;p__Basidiomycota;c__Ustilaginomycetes;o__Ustilaginales;f__Ustilaginaceae;g__Stegocintractia;
f__Mortierellaceae;g__unidentified	0.002642	0.006874	k__Fungi;p__Mortierellomycota;c__Mortierellomycetes;o__Mortierellales;f__Mortierellaceae;g__unidentified;
Trichurus	0.00074	0.00257	k__Fungi;p__Ascomycota;c__Sordariomycetes;o__Microascales;f__Microascales_fam_Incertae_sedis;g__Trichurus;
Fusicolla	0.00066	0.006029	k__Fungi;p__Ascomycota;c__Sordariomycetes;o__Hypocreales;f__Nectriaceae;g__Fusicolla;
Trichocladium	0.000423	0.005517	k__Fungi;p__Ascomycota;c__Sordariomycetes;o__Sordariales;f__Chaetomiaceae;g__Trichocladium;
Piloderma	4e-06	0.001577	k__Fungi;p__Basidiomycota;c__Agaricomycetes;o__Atheliales;f__Atheliaceae;g__Piloderma;
Gyromitra	2.5e-05	0.002046	k__Fungi;p__Ascomycota;c__Pezizomycetes;o__Pezizales;f__Discinaceae;g__Gyromitra;
Papulaspora	0.000372	0.004016	k__Fungi;p__Ascomycota;c__Sordariomycetes;o__Sordariales;f__Sordariales_fam_Incertae_sedis;g__Papulaspora;
unidentified_Zoopagales_sp	0.003315	0.002486	k__Fungi;p__Zoopagomycota;c__Zoopagomycetes;o__Zoopagales;f__unidentified_Zoopagales_sp;g__unidentified_Zoopagales_sp;
unidentified_Coniochaetales_sp	0.003226	0.001797	k__Fungi;p__Ascomycota;c__Sordariomycetes;o__Coniochaetales;f__unidentified_Coniochaetales_sp;g__unidentified_Coniochaetales_sp;
unidentified_Helotiales_sp	0.001247	8.9e-05	k__Fungi;p__Ascomycota;c__Leotiomycetes;o__Helotiales;f__unidentified_Helotiales_sp;g__unidentified_Helotiales_sp;
Cystofilobasidium	0.003649	0.001983	k__Fungi;p__Basidiomycota;c__Tremellomycetes;o__Cystofilobasidiales;f__Cystofilobasidiaceae;g__Cystofilobasidium;
unidentified_Pleosporales_sp	0.001142	0.000245	k__Fungi;p__Ascomycota;c__Dothideomycetes;o__Pleosporales;f__unidentified_Pleosporales_sp;g__unidentified_Pleosporales_sp;
Ulkenomyces	0.001087	0.001471	k__Fungi;p__Chytridiomycota;c__Rhizophydiomycetes;o__Rhizophydiales;f__Halomycetaceae;g__Ulkenomyces;
Biappendiculispora	0.000681	0.001484	k__Fungi;p__Ascomycota;c__Dothideomycetes;o__Pleosporales;f__Lophiostomataceae;g__Biappendiculispora;
f__Powellomycetaceae;g__unidentified	0.000478	0.00145	k__Fungi;p__Chytridiomycota;c__Spizellomycetes;o__Spizellomycetales;f__Powellomycetaceae;g__unidentified;
unidentified_GS16_sp	0.00074	0.002647	k__Fungi;p__Aphelidiomycota;c__Aphelidiomycetes;o__GS16;f__unidentified_GS16_sp;g__unidentified_GS16_sp;
f__Chaetomiaceae;g__unidentified	0.000283	0.002072	k__Fungi;p__Ascomycota;c__Sordariomycetes;o__Sordariales;f__Chaetomiaceae;g__unidentified;
Acremonium	0.003145	0.001344	k__Fungi;p__Ascomycota;c__Sordariomycetes;o__Hypocreales;f__Hypocreales_fam_Incertae_sedis;g__Acremonium;
Sarocladium	0.000972	0.001721	k__Fungi;p__Ascomycota;c__Sordariomycetes;o__Hypocreales;f__Hypocreales_fam_Incertae_sedis;g__Sarocladium;
Kernia	0.000118	0.000977	k__Fungi;p__Ascomycota;c__Sordariomycetes;o__Microascales;f__Microascaceae;g__Kernia;
Didymocyrtis	0.000871	3e-05	k__Fungi;p__Ascomycota;c__Dothideomycetes;o__Pleosporales;f__Phaeosphaeriaceae;g__Didymocyrtis;
unidentified_Spizellomycetales_sp	0.000858	8e-05	k__Fungi;p__Chytridiomycota;c__Spizellomycetes;o__Spizellomycetales;f__unidentified_Spizellomycetales_sp;g__unidentified_Spizellomycetales_sp;
unidentified_Endogonales_sp	7.2e-05	0.001907	k__Fungi;p__Mucoromycota;c__Endogonomycetes;o__Endogonales;f__unidentified_Endogonales_sp;g__unidentified_Endogonales_sp;
Piptocephalis	0.00071	0.001662	k__Fungi;p__Zoopagomycota;c__Zoopagomycetes;o__Zoopagales;f__Piptocephalidaceae;g__Piptocephalis;
unidentified_Saccharomycetales_sp	0.00041	0.001501	k__Fungi;p__Ascomycota;c__Saccharomycetes;o__Saccharomycetales;f__unidentified_Saccharomycetales_sp;g__unidentified_Saccharomycetales_sp;
Ochroconis	0.000571	1.3e-05	k__Fungi;p__Ascomycota;c__Dothideomycetes;o__Venturiales;f__Sympoventuriaceae;g__Ochroconis;
Metarhizium	0.000803	0.000233	k__Fungi;p__Ascomycota;c__Sordariomycetes;o__Hypocreales;f__Clavicipitaceae;g__Metarhizium;
unidentified_Microascales_sp	0.001353	0.000638	k__Fungi;p__Ascomycota;c__Sordariomycetes;o__Microascales;f__unidentified_Microascales_sp;g__unidentified_Microascales_sp;
Chrysosporium	0.002182	0.000888	k__Fungi;p__Ascomycota;c__Eurotiomycetes;o__Onygenales;f__Onygenales_fam_Incertae_sedis;g__Chrysosporium;
unidentified_Russulales_sp	0.001239	0.001416	k__Fungi;p__Basidiomycota;c__Agaricomycetes;o__Russulales;f__unidentified_Russulales_sp;g__unidentified_Russulales_sp;
Gilmaniella	5.9e-05	0.001459	k__Fungi;p__Ascomycota;c__Sordariomycetes;o__Sordariales;f__Chaetomiaceae;g__Gilmaniella;
f__Ascobolaceae;g__unidentified	9.3e-05	0.001366	k__Fungi;p__Ascomycota;c__Pezizomycetes;o__Pezizales;f__Ascobolaceae;g__unidentified;
Myrothecium	0.001475	0.000926	k__Fungi;p__Ascomycota;c__Sordariomycetes;o__Hypocreales;f__Stachybotryaceae;g__Myrothecium;
Nodulosphaeria	0.000909	4.7e-05	k__Fungi;p__Ascomycota;c__Dothideomycetes;o__Pleosporales;f__Phaeosphaeriaceae;g__Nodulosphaeria;
Pseudogymnoascus	0.000364	0.001158	k__Fungi;p__Ascomycota;c__Leotiomycetes;o__Thelebolales;f__Pseudeurotiaceae;g__Pseudogymnoascus;
Trichoderma	0.00137	0.001442	k__Fungi;p__Ascomycota;c__Sordariomycetes;o__Hypocreales;f__Hypocreaceae;g__Trichoderma;
unidentified_Hypocreales_sp	0.001585	0.000342	k__Fungi;p__Ascomycota;c__Sordariomycetes;o__Hypocreales;f__unidentified_Hypocreales_sp;g__unidentified_Hypocreales_sp;
Cephaliophora	9.7e-05	0.000431	k__Fungi;p__Ascomycota;c__Pezizomycetes;o__Pezizales;f__Ascodesmidaceae;g__Cephaliophora;
Imaia	0.00041	3.8e-05	k__Fungi;p__Ascomycota;c__Pezizomycetes;o__Pezizales;f__Pezizaceae;g__Imaia;
Neocucurbitaria	0.001442	0.001053	k__Fungi;p__Ascomycota;c__Dothideomycetes;o__Pleosporales;f__Cucurbitariaceae;g__Neocucurbitaria;
Syncephalis	0.000275	0.001247	k__Fungi;p__Zoopagomycota;c__Zoopagomycetes;o__Zoopagales;f__Piptocephalidaceae;g__Syncephalis;
Clonostachys	0.001361	0.000698	k__Fungi;p__Ascomycota;c__Sordariomycetes;o__Hypocreales;f__Bionectriaceae;g__Clonostachys;
Stachybotrys	0.000753	0.001158	k__Fungi;p__Ascomycota;c__Sordariomycetes;o__Hypocreales;f__Stachybotryaceae;g__Stachybotrys;
unidentified_Agaricales_sp	0.000533	0.000114	k__Fungi;p__Basidiomycota;c__Agaricomycetes;o__Agaricales;f__unidentified_Agaricales_sp;g__unidentified_Agaricales_sp;
unidentified_Pucciniomycetes_sp	0.000156	0.000402	k__Fungi;p__Basidiomycota;c__Pucciniomycetes;o__unidentified_Pucciniomycetes_sp;f__unidentified_Pucciniomycetes_sp;g__unidentified_Pucciniomycetes_sp;
Ustilago	0.000647	0.000524	k__Fungi;p__Basidiomycota;c__Ustilaginomycetes;o__Ustilaginales;f__Ustilaginaceae;g__Ustilago;
Polyphlyctis	0	0.000444	k__Fungi;p__Chytridiomycota;c__Chytridiomycetes;o__Chytridiales;f__Chytridiaceae;g__Polyphlyctis;
Suillus	0.000313	5.5e-05	k__Fungi;p__Basidiomycota;c__Agaricomycetes;o__Boletales;f__Suillaceae;g__Suillus;
unidentified_Rozellomycota_sp	0.001006	0.000799	k__Fungi;p__Rozellomycota;c__unidentified_Rozellomycota_sp;o__unidentified_Rozellomycota_sp;f__unidentified_Rozellomycota_sp;g__unidentified_Rozellomycota_sp;
Kodamaea	5.5e-05	0.001087	k__Fungi;p__Ascomycota;c__Saccharomycetes;o__Saccharomycetales;f__Metschnikowiaceae;g__Kodamaea;
Sistotrema	0.000338	4e-06	k__Fungi;p__Basidiomycota;c__Agaricomycetes;o__Cantharellales;f__Cantharellales_fam_Incertae_sedis;g__Sistotrema;
unidentified_Eurotiomycetes_sp	8e-06	0.000419	k__Fungi;p__Ascomycota;c__Eurotiomycetes;o__unidentified_Eurotiomycetes_sp;f__unidentified_Eurotiomycetes_sp;g__unidentified_Eurotiomycetes_sp;
Tubulicrinis	6.3e-05	0.000638	k__Fungi;p__Basidiomycota;c__Agaricomycetes;o__Hymenochaetales;f__Tubulicrinaceae;g__Tubulicrinis;
f__Pezizaceae;g__unidentified	0.000292	0.00011	k__Fungi;p__Ascomycota;c__Pezizomycetes;o__Pezizales;f__Pezizaceae;g__unidentified;
unidentified_GS11_sp	0.000884	0.000571	k__Fungi;p__Rozellomycota;c__Rozellomycotina_cls_Incertae_sedis;o__GS11;f__unidentified_GS11_sp;g__unidentified_GS11_sp;
f__Glomeraceae;g__unidentified	0.000397	0.000114	k__Fungi;p__Glomeromycota;c__Glomeromycetes;o__Glomerales;f__Glomeraceae;g__unidentified;
Paecilomyces	0.000795	0.000275	k__Fungi;p__Ascomycota;c__Sordariomycetes;o__Hypocreales;f__Clavicipitaceae;g__Paecilomyces;
f__Thelephoraceae;g__unidentified	0.000799	0.000156	k__Fungi;p__Basidiomycota;c__Agaricomycetes;o__Thelephorales;f__Thelephoraceae;g__unidentified;
unidentified_GS05_sp	0.000448	1.7e-05	k__Fungi;p__Rozellomycota;c__Rozellomycotina_cls_Incertae_sedis;o__GS05;f__unidentified_GS05_sp;g__unidentified_GS05_sp;
Lichenomphalia	0.000326	0.0003	k__Fungi;p__Basidiomycota;c__Agaricomycetes;o__Agaricales;f__Tricholomataceae;g__Lichenomphalia;
unidentified_Zoopagomycota_sp	0.000376	0.00074	k__Fungi;p__Zoopagomycota;c__unidentified_Zoopagomycota_sp;o__unidentified_Zoopagomycota_sp;f__unidentified_Zoopagomycota_sp;g__unidentified_Zoopagomycota_sp;
Acrophialophora	5.1e-05	0.000389	k__Fungi;p__Ascomycota;c__Sordariomycetes;o__Sordariales;f__Chaetomiaceae;g__Acrophialophora;
Patinella	0.000575	0.000313	k__Fungi;p__Ascomycota;c__Leotiomycetes;o__Helotiales;f__Dermateaceae;g__Patinella;
Dactylonectria	0.000846	0.000309	k__Fungi;p__Ascomycota;c__Sordariomycetes;o__Hypocreales;f__Nectriaceae;g__Dactylonectria;
Mrakia	0.000714	0.000681	k__Fungi;p__Basidiomycota;c__Tremellomycetes;o__Cystofilobasidiales;f__Mrakiaceae;g__Mrakia;
f__Ceratocystidaceae;g__unidentified	2.5e-05	0.000571	k__Fungi;p__Ascomycota;c__Sordariomycetes;o__Microascales;f__Ceratocystidaceae;g__unidentified;
Geastrum	0.000719	0.000558	k__Fungi;p__Basidiomycota;c__Agaricomycetes;o__Geastrales;f__Geastraceae;g__Geastrum;
unidentified_Sordariales_sp	0.000144	0.000592	k__Fungi;p__Ascomycota;c__Sordariomycetes;o__Sordariales;f__unidentified_Sordariales_sp;g__unidentified_Sordariales_sp;
Neocosmospora	9.7e-05	0.000757	k__Fungi;p__Ascomycota;c__Sordariomycetes;o__Hypocreales;f__Nectriaceae;g__Neocosmospora;
unidentified_Gigasporales_sp	0.000355	0.000486	k__Fungi;p__Glomeromycota;c__Glomeromycetes;o__Gigasporales;f__unidentified_Gigasporales_sp;g__unidentified_Gigasporales_sp;
Phallus	0.000127	0.000342	k__Fungi;p__Basidiomycota;c__Agaricomycetes;o__Phallales;f__Phallaceae;g__Phallus;
Botryosporium	0.000609	5.9e-05	k__Fungi;p__Ascomycota;c__Sordariomycetes;o__Hypoceales;f__Catabotrydaceae;g__Botryosporium;
Curvibasidium	4e-06	0.000431	k__Fungi;p__Basidiomycota;c__Microbotryomycetes;o__Microbotryomycetes_ord_Incertae_sedis;f__Microbotryomycetes_fam_Incertae_sedis;g__Curvibasidium;
Massariosphaeria	0.000114	0.000292	k__Fungi;p__Ascomycota;c__Dothideomycetes;o__Pleosporales;f__Pleosporales_fam_Incertae_sedis;g__Massariosphaeria;
f__Nectriaceae;g__unidentified	0.000292	0.000313	k__Fungi;p__Ascomycota;c__Sordariomycetes;o__Hypocreales;f__Nectriaceae;g__unidentified;
Titaea	0.000423	0.000448	k__Fungi;p__Ascomycota;c__Dothideomycetes;o__Tubeufiales;f__Tubeufiaceae;g__Titaea;
Corynascella	2.5e-05	0.000359	k__Fungi;p__Ascomycota;c__Sordariomycetes;o__Sordariales;f__Chaetomiaceae;g__Corynascella;
Peziza	0.000165	0	k__Fungi;p__Ascomycota;c__Pezizomycetes;o__Pezizales;f__Pezizaceae;g__Peziza;
Tausonia	0.000359	0.00014	k__Fungi;p__Basidiomycota;c__Tremellomycetes;o__Cystofilobasidiales;f__Mrakiaceae;g__Tausonia;
Talaromyces	0.000296	0.000406	k__Fungi;p__Ascomycota;c__Eurotiomycetes;o__Eurotiales;f__Trichocomaceae;g__Talaromyces;
unidentified_Ascomycota_sp	0.00052	0.000672	k__Fungi;p__Ascomycota;c__unidentified_Ascomycota_sp;o__unidentified_Ascomycota_sp;f__unidentified_Ascomycota_sp;g__unidentified_Ascomycota_sp;
f__Ustilaginaceae;g__unidentified	0.000114	0.000368	k__Fungi;p__Basidiomycota;c__Ustilaginomycetes;o__Ustilaginales;f__Ustilaginaceae;g__unidentified;
Iodophanus	0.00019	2.5e-05	k__Fungi;p__Ascomycota;c__Pezizomycetes;o__Pezizales;f__Pezizaceae;g__Iodophanus;
unidentified_Sordariomycetes_sp	0.000397	0.00066	k__Fungi;p__Ascomycota;c__Sordariomycetes;o__unidentified_Sordariomycetes_sp;f__unidentified_Sordariomycetes_sp;g__unidentified_Sordariomycetes_sp;
Gymnoascus	5.9e-05	0.000452	k__Fungi;p__Ascomycota;c__Eurotiomycetes;o__Onygenales;f__Gymnoascaceae;g__Gymnoascus;
Beauveria	0.000385	0.000216	k__Fungi;p__Ascomycota;c__Sordariomycetes;o__Hypocreales;f__Cordycipitaceae;g__Beauveria;
Leptosphaeria	0.000283	0.000533	k__Fungi;p__Ascomycota;c__Dothideomycetes;o__Pleosporales;f__Leptosphaeriaceae;g__Leptosphaeria;
Apiotrichum	0	0.000156	k__Fungi;p__Basidiomycota;c__Tremellomycetes;o__Trichosporonales;f__Trichosporonaceae;g__Apiotrichum;
Remersonia	0.000194	3.8e-05	k__Fungi;p__Ascomycota;c__Sordariomycetes;o__Sordariales;f__Sordariales_fam_Incertae_sedis;g__Remersonia;
Tulostoma	0.000372	0.000152	k__Fungi;p__Basidiomycota;c__Agaricomycetes;o__Agaricales;f__Agaricaceae;g__Tulostoma;
Gamsylella	0.000279	0.000203	k__Fungi;p__Ascomycota;c__Orbiliomycetes;o__Orbiliales;f__Orbiliaceae;g__Gamsylella;
Roussoella	3e-05	0.000507	k__Fungi;p__Ascomycota;c__Dothideomycetes;o__Pleosporales;f__Thyridariaceae;g__Roussoella;
unidentified_Auriculariales_sp	0.000148	6.3e-05	k__Fungi;p__Basidiomycota;c__Agaricomycetes;o__Auriculariales;f__unidentified_Auriculariales_sp;g__unidentified_Auriculariales_sp;
Sporidiobolus	0	0.000135	k__Fungi;p__Basidiomycota;c__Microbotryomycetes;o__Sporidiobolales;f__Sporidiobolaceae;g__Sporidiobolus;
Melanospora	0.000258	0.000123	k__Fungi;p__Ascomycota;c__Sordariomycetes;o__Melanosporales;f__Melanosporaceae;g__Melanospora;
Heterobasidion	0.000106	0.000419	k__Fungi;p__Basidiomycota;c__Agaricomycetes;o__Russulales;f__Bondarzewiaceae;g__Heterobasidion;
f__Magnaporthaceae;g__unidentified	0.000123	0.000313	k__Fungi;p__Ascomycota;c__Sordariomycetes;o__Magnaporthales;f__Magnaporthaceae;g__unidentified;
Thielavia	0	0.000199	k__Fungi;p__Ascomycota;c__Sordariomycetes;o__Sordariales;f__Chaetomiaceae;g__Thielavia;
unidentified_Archaeorhizomycetes_sp	0.000144	8e-06	k__Fungi;p__Ascomycota;c__Archaeorhizomycetes;o__unidentified_Archaeorhizomycetes_sp;f__unidentified_Archaeorhizomycetes_sp;g__unidentified_Archaeorhizomycetes_sp;
Podospora	6.3e-05	0.000165	k__Fungi;p__Ascomycota;c__Sordariomycetes;o__Sordariales;f__Lasiosphaeriaceae;g__Podospora;
Pleotrichocladium	1.7e-05	0.000355	k__Fungi;p__Ascomycota;c__Dothideomycetes;o__Pleosporales;f__Melanommataceae;g__Pleotrichocladium;
Xenasma	0.0003	0.000287	k__Fungi;p__Basidiomycota;c__Agaricomycetes;o__Polyporales;f__Xenasmataceae;g__Xenasma;
Erythrobasidium	8e-06	0.000131	k__Fungi;p__Basidiomycota;c__Cystobasidiomycetes;o__Erythrobasidiales;f__Erythrobasidiaceae;g__Erythrobasidium;
Pseudobensingtonia	3e-05	0.000224	k__Fungi;p__Basidiomycota;c__Agaricostilbomycetes;o__Agaricostilbales;f__Agaricostilbaceae;g__Pseudobensingtonia;
f__Lasiosphaeriaceae;g__unidentified	0.000144	0.000368	k__Fungi;p__Ascomycota;c__Sordariomycetes;o__Sordariales;f__Lasiosphaeriaceae;g__unidentified;
Arthroderma	0.000304	6.8e-05	k__Fungi;p__Ascomycota;c__Eurotiomycetes;o__Onygenales;f__Arthrodermataceae;g__Arthroderma;
Lacazia	0.000233	0.000271	k__Fungi;p__Ascomycota;c__Eurotiomycetes;o__Onygenales;f__Onygenales_fam_Incertae_sedis;g__Lacazia;
Cladorrhinum	1.3e-05	0.000118	k__Fungi;p__Ascomycota;c__Sordariomycetes;o__Sordariales;f__Lasiosphaeriaceae;g__Cladorrhinum;
Mucor	0.00022	0.000161	k__Fungi;p__Mucoromycota;c__Mucoromycetes;o__Mucorales;f__Mucoraceae;g__Mucor;
unidentified_Orbiliales_sp	8.9e-05	0.000368	k__Fungi;p__Ascomycota;c__Orbiliomycetes;o__Orbiliales;f__unidentified_Orbiliales_sp;g__unidentified_Orbiliales_sp;
unidentified_Tremellomycetes_sp	0.00014	0.000359	k__Fungi;p__Basidiomycota;c__Tremellomycetes;o__unidentified_Tremellomycetes_sp;f__unidentified_Tremellomycetes_sp;g__unidentified_Tremellomycetes_sp;
Coniochaeta	0.000148	1.3e-05	k__Fungi;p__Ascomycota;c__Sordariomycetes;o__Coniochaetales;f__Coniochaetaceae;g__Coniochaeta;
Massaria	0.000127	0	k__Fungi;p__Ascomycota;c__Dothideomycetes;o__Pleosporales;f__Massariaceae;g__Massaria;
Rhizopus	0.000317	0.000368	k__Fungi;p__Mucoromycota;c__Mucoromycetes;o__Mucorales;f__Rhizopodaceae;g__Rhizopus;
unidentified_Chaetothyriales_sp	0.000389	0.000178	k__Fungi;p__Ascomycota;c__Eurotiomycetes;o__Chaetothyriales;f__unidentified_Chaetothyriales_sp;g__unidentified_Chaetothyriales_sp;
unidentified_Basidiomycota_sp	0.000165	2.5e-05	k__Fungi;p__Basidiomycota;c__unidentified_Basidiomycota_sp;o__unidentified_Basidiomycota_sp;f__unidentified_Basidiomycota_sp;g__unidentified_Basidiomycota_sp;
Verpa	3.8e-05	0.000135	k__Fungi;p__Ascomycota;c__Pezizomycetes;o__Pezizales;f__Morchellaceae;g__Verpa;
Sporobolomyces	2.1e-05	0.000123	k__Fungi;p__Basidiomycota;c__Microbotryomycetes;o__Sporidiobolales;f__Sporidiobolaceae;g__Sporobolomyces;
Zopfiella	4e-06	0.000123	k__Fungi;p__Ascomycota;c__Sordariomycetes;o__Sordariales;f__Chaetomiaceae;g__Zopfiella;
Naganishia	6.8e-05	0.000287	k__Fungi;p__Basidiomycota;c__Tremellomycetes;o__Filobasidiales;f__Filobasidiaceae;g__Naganishia;
Monocillium	0.000114	0.000254	k__Fungi;p__Ascomycota;c__Sordariomycetes;o__Hypocreales;f__Hypocreaceae;g__Monocillium;
Hamigera	0	0.000106	k__Fungi;p__Ascomycota;c__Eurotiomycetes;o__Eurotiales;f__Aspergillaceae;g__Hamigera;
Synchytrium	0.000178	4e-06	k__Fungi;p__Chytridiomycota;c__Synchytriomycetes;o__Synchytriales;f__Synchytriaceae;g__Synchytrium;
Thermomyces	9.7e-05	0.000389	k__Fungi;p__Ascomycota;c__Eurotiomycetes;o__Eurotiales;f__Trichocomaceae;g__Thermomyces;
Meliniomyces	9.3e-05	0	k__Fungi;p__Ascomycota;c__Leotiomycetes;o__Helotiales;f__Helotiaceae;g__Meliniomyces;
unidentified_Agaricomycetes_sp	0.000131	0.000211	k__Fungi;p__Basidiomycota;c__Agaricomycetes;o__unidentified_Agaricomycetes_sp;f__unidentified_Agaricomycetes_sp;g__unidentified_Agaricomycetes_sp;
Orbilia	0.000309	0.000135	k__Fungi;p__Ascomycota;c__Orbiliomycetes;o__Orbiliales;f__Orbiliaceae;g__Orbilia;
Clavaria	0.000178	3e-05	k__Fungi;p__Basidiomycota;c__Agaricomycetes;o__Agaricales;f__Clavariaceae;g__Clavaria;
Lecanicillium	0.000152	0.000152	k__Fungi;p__Ascomycota;c__Sordariomycetes;o__Hypocreales;f__Cordycipitaceae;g__Lecanicillium;
Cylindrocarpon	0.000203	0.000207	k__Fungi;p__Ascomycota;c__Sordariomycetes;o__Hypocreales;f__Nectriaceae;g__Cylindrocarpon;
Leptospora	0.000304	4e-06	k__Fungi;p__Ascomycota;c__Dothideomycetes;o__Pleosporales;f__Phaeosphaeriaceae;g__Leptospora;
Olpidium	9.3e-05	2.1e-05	k__Fungi;p__Olpidiomycota;c__Olpidiomycetes;o__Olpidiales;f__Olpidiaceae;g__Olpidium;
Pseudonectria	1.3e-05	8.5e-05	k__Fungi;p__Ascomycota;c__Sordariomycetes;o__Hypocreales;f__Nectriaceae;g__Pseudonectria;
Metacordyceps	2.5e-05	0.00011	k__Fungi;p__Ascomycota;c__Sordariomycetes;o__Hypocreales;f__Clavicipitaceae;g__Metacordyceps;
f__Catenariaceae;g__unidentified	0	8.9e-05	k__Fungi;p__Blastocladiomycota;c__Blastocladiomycetes;o__Blastocladiales;f__Catenariaceae;g__unidentified;
f__Herpotrichiellaceae;g__unidentified	0.000186	0.000182	k__Fungi;p__Ascomycota;c__Eurotiomycetes;o__Chaetothyriales;f__Herpotrichiellaceae;g__unidentified;
f__Pyronemataceae;g__unidentified	0	8.9e-05	k__Fungi;p__Ascomycota;c__Pezizomycetes;o__Pezizales;f__Pyronemataceae;g__unidentified;
Pseudeurotium	0.000233	6.8e-05	k__Fungi;p__Ascomycota;c__Leotiomycetes;o__Thelebolales;f__Pseudeurotiaceae;g__Pseudeurotium;
f__Trimorphomycetaceae;g__unidentified	1.7e-05	0.000161	k__Fungi;p__Basidiomycota;c__Tremellomycetes;o__Tremellales;f__Trimorphomycetaceae;g__unidentified;
Tetracladium	0.000279	0.000173	k__Fungi;p__Ascomycota;c__Leotiomycetes;o__Helotiales;f__Helotiaceae;g__Tetracladium;
Phoma	0.000131	5.1e-05	k__Fungi;p__Ascomycota;c__Dothideomycetes;o__Pleosporales;f__Didymellaceae;g__Phoma;
Xylaria	0.000131	2.1e-05	k__Fungi;p__Ascomycota;c__Sordariomycetes;o__Xylariales;f__Xylariaceae;g__Xylaria;
Dacrymyces	7.2e-05	0	k__Fungi;p__Basidiomycota;c__Dacrymycetes;o__Dacrymycetales;f__Dacrymycetaceae;g__Dacrymyces;
f__Lophiostomataceae;g__unidentified	7.2e-05	0	k__Fungi;p__Ascomycota;c__Dothideomycetes;o__Pleosporales;f__Lophiostomataceae;g__unidentified;
Eleutherascus	0.000114	2.1e-05	k__Fungi;p__Ascomycota;c__Pezizomycetes;o__Pezizales;f__Ascodesmidaceae;g__Eleutherascus;
Heleococcum	8e-06	7.2e-05	k__Fungi;p__Ascomycota;c__Sordariomycetes;o__Hypocreales;f__Bionectriaceae;g__Heleococcum;
unidentified_Mortierellales_sp	0.00011	5.9e-05	k__Fungi;p__Mortierellomycota;c__Mortierellomycetes;o__Mortierellales;f__unidentified_Mortierellales_sp;g__unidentified_Mortierellales_sp;
Capronia	0.000178	3.8e-05	k__Fungi;p__Ascomycota;c__Eurotiomycetes;o__Chaetothyriales;f__Herpotrichiellaceae;g__Capronia;
Craterellus	3.8e-05	0.000194	k__Fungi;p__Basidiomycota;c__Agaricomycetes;o__Cantharellales;f__Cantharellaceae;g__Craterellus;
Exophiala	4.7e-05	0.00019	k__Fungi;p__Ascomycota;c__Eurotiomycetes;o__Chaetothyriales;f__Herpotrichiellaceae;g__Exophiala;
Cladophialophora	0.000182	0.000194	k__Fungi;p__Ascomycota;c__Eurotiomycetes;o__Chaetothyriales;f__Herpotrichiellaceae;g__Cladophialophora;
Pseudallescheria	0.000148	8e-06	k__Fungi;p__Ascomycota;c__Sordariomycetes;o__Microascales;f__Microascaceae;g__Pseudallescheria;
Pseudothielavia	8e-06	0.000114	k__Fungi;p__Ascomycota;c__Sordariomycetes;o__Sordariales;f__Chaetomiaceae;g__Pseudothielavia;
Monographella	6.8e-05	0.000186	k__Fungi;p__Ascomycota;c__Sordariomycetes;o__Xylariales;f__Hyponectriaceae;g__Monographella;
unidentified_Glomeromycotina	3e-05	0.000127	k__Fungi;p__Glomeromycota;c__unidentified_Glomeromycotina;o__unidentified_Glomeromycotina;f__unidentified_Glomeromycotina;g__unidentified_Glomeromycotina;
Diversispora	0	0.000118	k__Fungi;p__Glomeromycota;c__Glomeromycetes;o__Diversisporales;f__Diversisporaceae;g__Diversispora;
Neodactylaria	0.000161	0.00019	k__Fungi;p__Ascomycota;c__Dothideomycetes;o__Dothideomycetes_ord_Incertae_sedis;f__Dothideomycetes_fam_Incertae_sedis;g__Neodactylaria;
unidentified_GS02_sp	0.00011	6.3e-05	k__Fungi;p__Rozellomycota;c__Rozellomycotina_cls_Incertae_sedis;o__GS02;f__unidentified_GS02_sp;g__unidentified_GS02_sp;
f__Aspergillaceae;g__unidentified	0.000152	1.7e-05	k__Fungi;p__Ascomycota;c__Eurotiomycetes;o__Eurotiales;f__Aspergillaceae;g__unidentified;
Leucosporidium	0.000123	0.000114	k__Fungi;p__Basidiomycota;c__Microbotryomycetes;o__Leucosporidiales;f__Leucosporidiaceae;g__Leucosporidium;
Colletotrichum	0	5.1e-05	k__Fungi;p__Ascomycota;c__Sordariomycetes;o__Glomerellales;f__Glomerellaceae;g__Colletotrichum;
Endophragmiella	8e-06	8e-05	k__Fungi;p__Ascomycota;c__Sordariomycetes;o__Sordariales;f__Helminthosphaeriaceae;g__Endophragmiella;
Sirastachys	0.000118	9.7e-05	k__Fungi;p__Ascomycota;c__Sordariomycetes;o__Hypocreales;f__Stachybotryaceae;g__Sirastachys;
f__Sympoventuriaceae;g__unidentified	7.6e-05	0.000118	k__Fungi;p__Ascomycota;c__Dothideomycetes;o__Venturiales;f__Sympoventuriaceae;g__unidentified;
f__Trichocomaceae;g__unidentified	0	5.1e-05	k__Fungi;p__Ascomycota;c__Eurotiomycetes;o__Eurotiales;f__Trichocomaceae;g__unidentified;
Symmetrospora	0	5.1e-05	k__Fungi;p__Basidiomycota;c__Cystobasidiomycetes;o__Cystobasidiomycetes_ord_Incertae_sedis;f__Symmetrosporaceae;g__Symmetrospora;
Geminibasidium	7.2e-05	4.7e-05	k__Fungi;p__Basidiomycota;c__Geminibasidiomycetes;o__Geminibasidiales;f__Geminibasidiaceae;g__Geminibasidium;
Achroiostachys	0.00011	8.9e-05	k__Fungi;p__Ascomycota;c__Sordariomycetes;o__Hypocreales;f__Stachybotryaceae;g__Achroiostachys;
Amaurodon	5.1e-05	0	k__Fungi;p__Basidiomycota;c__Agaricomycetes;o__Thelephorales;f__Thelephoraceae;g__Amaurodon;
Paraglomus	1.3e-05	7.2e-05	k__Fungi;p__Glomeromycota;c__Paraglomeromycetes;o__Paraglomerales;f__Paraglomeraceae;g__Paraglomus;
Rotiferophthora	0	5.1e-05	k__Fungi;p__Ascomycota;c__Sordariomycetes;o__Hypocreales;f__Hypocreales_fam_Incertae_sedis;g__Rotiferophthora;
Entoloma	0.000152	1.7e-05	k__Fungi;p__Basidiomycota;c__Agaricomycetes;o__Agaricales;f__Entolomataceae;g__Entoloma;
Chalara	0.000148	1.3e-05	k__Fungi;p__Ascomycota;c__Leotiomycetes;o__Helotiales;f__Helotiales_fam_Incertae_sedis;g__Chalara;
Septofusidium	4.7e-05	0	k__Fungi;p__Ascomycota;c__Sordariomycetes;o__Hypocreales;f__Tilachlidiaceae;g__Septofusidium;
Spizellomyces	9.7e-05	0.000106	k__Fungi;p__Chytridiomycota;c__Spizellomycetes;o__Spizellomycetales;f__Spizellomycetaceae;g__Spizellomyces;
Gaertneriomyces	0	0.000156	k__Fungi;p__Chytridiomycota;c__Spizellomycetes;o__Spizellomycetales;f__Spizellomycetaceae;g__Gaertneriomyces;
Cunninghamella	6.8e-05	4e-06	k__Fungi;p__Mucoromycota;c__Mucoromycetes;o__Mucorales;f__Cunninghamellaceae;g__Cunninghamella;
Acephala	4e-06	5.9e-05	k__Fungi;p__Ascomycota;c__Leotiomycetes;o__Helotiales;f__Helotiales_fam_Incertae_sedis;g__Acephala;
unidentified_GS06_sp	1.3e-05	0.000144	k__Fungi;p__Rozellomycota;c__Rozellomycotina_cls_Incertae_sedis;o__GS06;f__unidentified_GS06_sp;g__unidentified_GS06_sp;
Nigrospora	1.3e-05	5.9e-05	k__Fungi;p__Ascomycota;c__Sordariomycetes;o__Trichosphaeriales;f__Trichosphaeriaceae;g__Nigrospora;
Amanita	0.000118	6.3e-05	k__Fungi;p__Basidiomycota;c__Agaricomycetes;o__Agaricales;f__Amanitaceae;g__Amanita;
Inocybe	3.4e-05	9.7e-05	k__Fungi;p__Basidiomycota;c__Agaricomycetes;o__Agaricales;f__Inocybaceae;g__Inocybe;
Chloridium	9.7e-05	0.000118	k__Fungi;p__Ascomycota;c__Sordariomycetes;o__Chaetosphaeriales;f__Chaetosphaeriaceae;g__Chloridium;
Catenaria	0	4.7e-05	k__Fungi;p__Blastocladiomycota;c__Blastocladiomycetes;o__Blastocladiales;f__Catenariaceae;g__Catenaria;
Saccharomycopsis	0.000118	3.8e-05	k__Fungi;p__Ascomycota;c__Saccharomycetes;o__Saccharomycetales;f__Saccharomycopsidaceae;g__Saccharomycopsis;
Curvularia	9.7e-05	4.7e-05	k__Fungi;p__Ascomycota;c__Dothideomycetes;o__Pleosporales;f__Pleosporaceae;g__Curvularia;
Sagenomella	3.8e-05	9.3e-05	k__Fungi;p__Ascomycota;c__Eurotiomycetes;o__Eurotiales;f__Trichocomaceae;g__Sagenomella;
Botryosphaeria	1.7e-05	4.2e-05	k__Fungi;p__Ascomycota;c__Dothideomycetes;o__Botryosphaeriales;f__Botryosphaeriaceae;g__Botryosphaeria;
Cercophora	5.9e-05	2.1e-05	k__Fungi;p__Ascomycota;c__Sordariomycetes;o__Sordariales;f__Lasiosphaeriaceae;g__Cercophora;
Geodina	5.1e-05	3.4e-05	k__Fungi;p__Ascomycota;c__Pezizomycetes;o__Pezizales;f__Sarcoscyphaceae;g__Geodina;
Pyrenochaeta	6.8e-05	7.6e-05	k__Fungi;p__Ascomycota;c__Dothideomycetes;o__Pleosporales;f__Cucurbitariaceae;g__Pyrenochaeta;
unidentified_Lobulomycetales_sp	1.3e-05	5.1e-05	k__Fungi;p__Chytridiomycota;c__Lobulomycetes;o__Lobulomycetales;f__unidentified_Lobulomycetales_sp;g__unidentified_Lobulomycetales_sp;
Helvella	1.3e-05	8.5e-05	k__Fungi;p__Ascomycota;c__Pezizomycetes;o__Pezizales;f__Helvellaceae;g__Helvella;
unidentified_GS01_sp	5.5e-05	3.8e-05	k__Fungi;p__GS01;c__unidentified_GS01_sp;o__unidentified_GS01_sp;f__unidentified_GS01_sp;g__unidentified_GS01_sp;
f__Agaricaceae;g__unidentified	4e-06	5.5e-05	k__Fungi;p__Basidiomycota;c__Agaricomycetes;o__Agaricales;f__Agaricaceae;g__unidentified;
Candelaria	0.000106	5.9e-05	k__Fungi;p__Ascomycota;c__Lecanoromycetes;o__Candelariales;f__Candelariaceae;g__Candelaria;
Darksidea	5.5e-05	0.000114	k__Fungi;p__Ascomycota;c__Dothideomycetes;o__Pleosporales;f__Lentitheciaceae;g__Darksidea;
Hypoderma	3.8e-05	3.8e-05	k__Fungi;p__Ascomycota;c__Leotiomycetes;o__Rhytismatales;f__Rhytismataceae;g__Hypoderma;
Powellomyces	1.7e-05	5.5e-05	k__Fungi;p__Chytridiomycota;c__Spizellomycetes;o__Spizellomycetales;f__Powellomycetaceae;g__Powellomyces;
Bipolaris	6.3e-05	2.1e-05	k__Fungi;p__Ascomycota;c__Dothideomycetes;o__Pleosporales;f__Pleosporaceae;g__Bipolaris;
Phialemonium	0.000114	8e-05	k__Fungi;p__Ascomycota;c__Sordariomycetes;o__Sordariales;f__Cephalothecaceae;g__Phialemonium;
Acaulopage	4e-06	5.1e-05	k__Fungi;p__Zoopagomycota;c__Zoopagomycetes;o__Zoopagales;f__Zoopagaceae;g__Acaulopage;
Lecidella	0.000101	4.2e-05	k__Fungi;p__Ascomycota;c__Lecanoromycetes;o__Lecanorales;f__Lecanoraceae;g__Lecidella;
Paraphoma	6.8e-05	3e-05	k__Fungi;p__Ascomycota;c__Dothideomycetes;o__Pleosporales;f__Phaeosphaeriaceae;g__Paraphoma;
Glomus	3e-05	7.2e-05	k__Fungi;p__Glomeromycota;c__Glomeromycetes;o__Glomerales;f__Glomeraceae;g__Glomus;
Microthecium	3e-05	5.1e-05	k__Fungi;p__Ascomycota;c__Sordariomycetes;o__Melanosporales;f__Ceratostomataceae;g__Microthecium;
Duddingtonia	3.4e-05	8e-06	k__Fungi;p__Ascomycota;c__Orbiliomycetes;o__Orbiliales;f__Orbiliaceae;g__Duddingtonia;
Periconia	2.5e-05	3.4e-05	k__Fungi;p__Ascomycota;c__Dothideomycetes;o__Pleosporales;f__Periconiaceae;g__Periconia;
Pyxidiophora	0	8.5e-05	k__Fungi;p__Ascomycota;c__Laboulbeniomycetes;o__Pyxidiophorales;f__Pyxidiophoraceae;g__Pyxidiophora;
unidentified_Chytridiomycetes_sp	1.7e-05	5.5e-05	k__Fungi;p__Chytridiomycota;c__Chytridiomycetes;o__unidentified_Chytridiomycetes_sp;f__unidentified_Chytridiomycetes_sp;g__unidentified_Chytridiomycetes_sp;
Sordaria	5.9e-05	8e-05	k__Fungi;p__Ascomycota;c__Sordariomycetes;o__Sordariales;f__Sordariaceae;g__Sordaria;
Stilbella	5.5e-05	2.1e-05	k__Fungi;p__Ascomycota;c__Sordariomycetes;o__Hypocreales;f__Hypocreales_fam_Incertae_sedis;g__Stilbella;
Polylobatispora	0	3.4e-05	k__Fungi;p__Ascomycota;c__Pezizomycotina_cls_Incertae_sedis;o__Pezizomycotina_ord_Incertae_sedis;f__Pezizomycotina_fam_Incertae_sedis;g__Polylobatispora;
Pyrenochaetopsis	2.1e-05	5.1e-05	k__Fungi;p__Ascomycota;c__Dothideomycetes;o__Pleosporales;f__Cucurbitariaceae;g__Pyrenochaetopsis;
Filobasidium	3.8e-05	4.7e-05	k__Fungi;p__Basidiomycota;c__Tremellomycetes;o__Filobasidiales;f__Filobasidiaceae;g__Filobasidium;
Microbotryum	5.9e-05	4e-06	k__Fungi;p__Basidiomycota;c__Microbotryomycetes;o__Microbotryales;f__Microbotryaceae;g__Microbotryum;
Cephalotrichum	0.000127	7.6e-05	k__Fungi;p__Ascomycota;c__Sordariomycetes;o__Microascales;f__Microascaceae;g__Cephalotrichum;
Tomentella	7.6e-05	5.5e-05	k__Fungi;p__Basidiomycota;c__Agaricomycetes;o__Thelephorales;f__Thelephoraceae;g__Tomentella;
Remispora	6.3e-05	5.1e-05	k__Fungi;p__Ascomycota;c__Sordariomycetes;o__Microascales;f__Halosphaeriaceae;g__Remispora;
Articulospora	3e-05	0	k__Fungi;p__Ascomycota;c__Leotiomycetes;o__Helotiales;f__Helotiaceae;g__Articulospora;
unidentified_Paraglomerales_sp	3.4e-05	1.7e-05	k__Fungi;p__Glomeromycota;c__Paraglomeromycetes;o__Paraglomerales;f__unidentified_Paraglomerales_sp;g__unidentified_Paraglomerales_sp;
Volutella	8.5e-05	1.3e-05	k__Fungi;p__Ascomycota;c__Sordariomycetes;o__Hypocreales;f__Nectriaceae;g__Volutella;
Epicoccum	4.7e-05	5.9e-05	k__Fungi;p__Ascomycota;c__Dothideomycetes;o__Pleosporales;f__Didymellaceae;g__Epicoccum;
Floropilus	0	7.6e-05	k__Fungi;p__Ascomycota;c__Sordariomycetes;o__Sordariales;f__Chaetomiaceae;g__Floropilus;
unidentified_Mortierellomycota_sp	3.4e-05	6.8e-05	k__Fungi;p__Mortierellomycota;c__unidentified_Mortierellomycota_sp;o__unidentified_Mortierellomycota_sp;f__unidentified_Mortierellomycota_sp;g__unidentified_Mortierellomycota_sp;
Westerdykella	7.2e-05	3.4e-05	k__Fungi;p__Ascomycota;c__Dothideomycetes;o__Pleosporales;f__Sporormiaceae;g__Westerdykella;
Exosporium	5.1e-05	7.6e-05	k__Fungi;p__Ascomycota;c__Dothideomycetes;o__Pleosporales;f__Massarinaceae;g__Exosporium;
f__Plectosphaerellaceae;g__unidentified	5.1e-05	3e-05	k__Fungi;p__Ascomycota;c__Sordariomycetes;o__Glomerellales;f__Plectosphaerellaceae;g__unidentified;
Moleospora	3e-05	1.7e-05	k__Fungi;p__Ascomycota;c__Sordariomycetes;o__Lulworthiales;f__Lulworthiaceae;g__Moleospora;
Leptodiscella	1.3e-05	3.8e-05	k__Fungi;p__Ascomycota;c__Dothideomycetes;o__Acrospermales;f__Acrospermales_fam_Incertae_sedis;g__Leptodiscella;
Massarina	7.6e-05	1.7e-05	k__Fungi;p__Ascomycota;c__Dothideomycetes;o__Pleosporales;f__Massarinaceae;g__Massarina;
Aplosporella	3e-05	0	k__Fungi;p__Ascomycota;c__Dothideomycetes;o__Botryosphaeriales;f__Aplosporellaceae;g__Aplosporella;
Aporospora	3e-05	0	k__Fungi;p__Ascomycota;c__Dothideomycetes;o__Pleosporales;f__Didymosphaeriaceae;g__Aporospora;
Dipsacomyces	0	3e-05	k__Fungi;p__Kickxellomycota;c__Kickxellomycetes;o__Kickxellales;f__Kickxellaceae;g__Dipsacomyces;
Leucoagaricus	8.5e-05	5.1e-05	k__Fungi;p__Basidiomycota;c__Agaricomycetes;o__Agaricales;f__Agaricaceae;g__Leucoagaricus;
Dipodascus	4.2e-05	1.3e-05	k__Fungi;p__Ascomycota;c__Saccharomycetes;o__Saccharomycetales;f__Dipodascaceae;g__Dipodascus;
Scedosporium	2.5e-05	3.8e-05	k__Fungi;p__Ascomycota;c__Sordariomycetes;o__Microascales;f__Microascaceae;g__Scedosporium;
Hannaella	4e-06	3e-05	k__Fungi;p__Basidiomycota;c__Tremellomycetes;o__Tremellales;f__Bulleribasidiaceae;g__Hannaella;
Papiliotrema	3.8e-05	0.00011	k__Fungi;p__Basidiomycota;c__Tremellomycetes;o__Tremellales;f__Rhynchogastremataceae;g__Papiliotrema;
unidentified_GS04_sp	4e-06	7.2e-05	k__Fungi;p__Rozellomycota;c__Rozellomycotina_cls_Incertae_sedis;o__GS04;f__unidentified_GS04_sp;g__unidentified_GS04_sp;
Subulicystidium	0	6.3e-05	k__Fungi;p__Basidiomycota;c__Agaricomycetes;o__Trechisporales;f__Hydnodontaceae;g__Subulicystidium;
Preussia	4.2e-05	4e-06	k__Fungi;p__Ascomycota;c__Dothideomycetes;o__Pleosporales;f__Sporormiaceae;g__Preussia;
Parmelia	1.7e-05	7.2e-05	k__Fungi;p__Ascomycota;c__Lecanoromycetes;o__Lecanorales;f__Parmeliaceae;g__Parmelia;
Magnaporthiopsis	1.7e-05	3.4e-05	k__Fungi;p__Ascomycota;c__Sordariomycetes;o__Magnaporthales;f__Magnaporthaceae;g__Magnaporthiopsis;
Paraconiothyrium	3.8e-05	3e-05	k__Fungi;p__Ascomycota;c__Dothideomycetes;o__Pleosporales;f__Didymosphaeriaceae;g__Paraconiothyrium;
Psathyrella	5.5e-05	1.7e-05	k__Fungi;p__Basidiomycota;c__Agaricomycetes;o__Agaricales;f__Psathyrellaceae;g__Psathyrella;
Schizothecium	5.1e-05	1.3e-05	k__Fungi;p__Ascomycota;c__Sordariomycetes;o__Sordariales;f__Lasiosphaeriaceae;g__Schizothecium;
Acrocalymma	8.5e-05	5.9e-05	k__Fungi;p__Ascomycota;c__Dothideomycetes;o__Pleosporales;f__Morosphaeriaceae;g__Acrocalymma;
f__Tulasnellaceae;g__unidentified	3.4e-05	0	k__Fungi;p__Basidiomycota;c__Agaricomycetes;o__Cantharellales;f__Tulasnellaceae;g__unidentified;
Thermoascus	2.5e-05	8e-06	k__Fungi;p__Ascomycota;c__Eurotiomycetes;o__Eurotiales;f__Thermoascaceae;g__Thermoascus;
Operculomyces	2.5e-05	0	k__Fungi;p__Chytridiomycota;c__Rhizophydiomycetes;o__Rhizophydiales;f__Rhizophydiales_fam_Incertae_sedis;g__Operculomyces;
unidentified_Onygenales_sp	0.000101	3.4e-05	k__Fungi;p__Ascomycota;c__Eurotiomycetes;o__Onygenales;f__unidentified_Onygenales_sp;g__unidentified_Onygenales_sp;
unidentified_Dothideomycetes_sp	4.7e-05	2.5e-05	k__Fungi;p__Ascomycota;c__Dothideomycetes;o__unidentified_Dothideomycetes_sp;f__unidentified_Dothideomycetes_sp;g__unidentified_Dothideomycetes_sp;
Sterigmatomyces	0	2.5e-05	k__Fungi;p__Basidiomycota;c__Agaricostilbomycetes;o__Agaricostilbales;f__Agaricostilbaceae;g__Sterigmatomyces;
Monodictys	4.7e-05	5.1e-05	k__Fungi;p__Ascomycota;c__Dothideomycetes;o__Pleosporales;f__Pleosporales_fam_Incertae_sedis;g__Monodictys;
Aphanoascus	2.5e-05	5.1e-05	k__Fungi;p__Ascomycota;c__Eurotiomycetes;o__Onygenales;f__Onygenaceae;g__Aphanoascus;
Cheilymenia	4e-06	2.5e-05	k__Fungi;p__Ascomycota;c__Pezizomycetes;o__Pezizales;f__Pyronemataceae;g__Cheilymenia;
Diploschistes	3e-05	4e-06	k__Fungi;p__Ascomycota;c__Lecanoromycetes;o__Ostropales;f__Graphidaceae;g__Diploschistes;
Lepraria	0	3.8e-05	k__Fungi;p__Ascomycota;c__Lecanoromycetes;o__Lecanorales;f__Stereocaulaceae;g__Lepraria;
Acaulium	2.5e-05	3.4e-05	k__Fungi;p__Ascomycota;c__Sordariomycetes;o__Microascales;f__Microascaceae;g__Acaulium;
Paracremonium	4.7e-05	1.3e-05	k__Fungi;p__Ascomycota;c__Sordariomycetes;o__Hypocreales;f__Nectriaceae;g__Paracremonium;
unidentified_Blastocladiomycota_sp	8e-06	3e-05	k__Fungi;p__Blastocladiomycota;c__unidentified_Blastocladiomycota_sp;o__unidentified_Blastocladiomycota_sp;f__unidentified_Blastocladiomycota_sp;g__unidentified_Blastocladiomycota_sp;
Ovatospora	2.5e-05	8e-06	k__Fungi;p__Ascomycota;c__Sordariomycetes;o__Sordariales;f__Chaetomiaceae;g__Ovatospora;
Rollandina	2.1e-05	0	k__Fungi;p__Ascomycota;c__Eurotiomycetes;o__Onygenales;f__Gymnoascaceae;g__Rollandina;
Sowerbyella	0	2.5e-05	k__Fungi;p__Ascomycota;c__Pezizomycetes;o__Pezizales;f__Pyronemataceae;g__Sowerbyella;
Stephanonectria	5.1e-05	4e-06	k__Fungi;p__Ascomycota;c__Sordariomycetes;o__Hypocreales;f__Nectriaceae;g__Stephanonectria;
Russula	5.1e-05	1.7e-05	k__Fungi;p__Basidiomycota;c__Agaricomycetes;o__Russulales;f__Russulaceae;g__Russula;
Thelonectria	3e-05	0	k__Fungi;p__Ascomycota;c__Sordariomycetes;o__Hypocreales;f__Nectriaceae;g__Thelonectria;
Saitozyma	3e-05	5.5e-05	k__Fungi;p__Basidiomycota;c__Tremellomycetes;o__Tremellales;f__Trimorphomycetaceae;g__Saitozyma;
f__Thelebolaceae;g__unidentified	2.5e-05	2.1e-05	k__Fungi;p__Ascomycota;c__Leotiomycetes;o__Thelebolales;f__Thelebolaceae;g__unidentified;
Harpellomyces	5.1e-05	1.7e-05	k__Fungi;p__Kickxellomycota;c__Harpellomycetes;o__Harpellales;f__Harpellaceae;g__Harpellomyces;
Teichospora	8e-06	2.1e-05	k__Fungi;p__Ascomycota;c__Dothideomycetes;o__Pleosporales;f__Teichosporaceae;g__Teichospora;
Antrodiella	4e-06	2.1e-05	k__Fungi;p__Basidiomycota;c__Agaricomycetes;o__Polyporales;f__Steccherinaceae;g__Antrodiella;
f__Pateramycetaceae;g__unidentified	2.1e-05	0	k__Fungi;p__Chytridiomycota;c__Rhizophydiomycetes;o__Rhizophydiales;f__Pateramycetaceae;g__unidentified;
Gymnopus	2.1e-05	0	k__Fungi;p__Basidiomycota;c__Agaricomycetes;o__Agaricales;f__Omphalotaceae;g__Gymnopus;
Meyerozyma	3e-05	0	k__Fungi;p__Ascomycota;c__Saccharomycetes;o__Saccharomycetales;f__Debaryomycetaceae;g__Meyerozyma;
Amesia	3e-05	3.4e-05	k__Fungi;p__Ascomycota;c__Sordariomycetes;o__Sordariales;f__Chaetomiaceae;g__Amesia;
Candida	7.2e-05	5.5e-05	k__Fungi;p__Ascomycota;c__Saccharomycetes;o__Saccharomycetales;f__Saccharomycetales_fam_Incertae_sedis;g__Candida;
Stylopage	8e-06	2.1e-05	k__Fungi;p__Zoopagomycota;c__Zoopagomycetes;o__Zoopagales;f__Zoopagaceae;g__Stylopage;
Rhodocollybia	2.1e-05	5.1e-05	k__Fungi;p__Basidiomycota;c__Agaricomycetes;o__Agaricales;f__Omphalotaceae;g__Rhodocollybia;
f__Thermoascaceae;g__unidentified	7.2e-05	4.7e-05	k__Fungi;p__Ascomycota;c__Eurotiomycetes;o__Eurotiales;f__Thermoascaceae;g__unidentified;
Heydenia	4.7e-05	4e-06	k__Fungi;p__Ascomycota;c__Pezizomycetes;o__Pezizales;f__Pyronemataceae;g__Heydenia;
Lasiosphaeria	4e-06	3.4e-05	k__Fungi;p__Ascomycota;c__Sordariomycetes;o__Sordariales;f__Lasiosphaeriaceae;g__Lasiosphaeria;
unidentified_Rhizophydiales_sp	3e-05	8e-06	k__Fungi;p__Chytridiomycota;c__Rhizophydiomycetes;o__Rhizophydiales;f__unidentified_Rhizophydiales_sp;g__unidentified_Rhizophydiales_sp;
Aureobasidium	3.8e-05	3.8e-05	k__Fungi;p__Ascomycota;c__Dothideomycetes;o__Dothideales;f__Aureobasidiaceae;g__Aureobasidium;
Microsphaeropsis	4.2e-05	6.8e-05	k__Fungi;p__Ascomycota;c__Dothideomycetes;o__Pleosporales;f__Pleosporales_fam_Incertae_sedis;g__Microsphaeropsis;
Hygrophorus	2.1e-05	0	k__Fungi;p__Basidiomycota;c__Agaricomycetes;o__Agaricales;f__Hygrophoraceae;g__Hygrophorus;
Harzia	3e-05	3e-05	k__Fungi;p__Ascomycota;c__Sordariomycetes;o__Melanosporales;f__Ceratostomataceae;g__Harzia;
Ilyonectria	3e-05	2.5e-05	k__Fungi;p__Ascomycota;c__Sordariomycetes;o__Hypocreales;f__Nectriaceae;g__Ilyonectria;
Kluyveromyces	4e-06	2.1e-05	k__Fungi;p__Ascomycota;c__Saccharomycetes;o__Saccharomycetales;f__Saccharomycetaceae;g__Kluyveromyces;
Tyromyces	2.5e-05	0	k__Fungi;p__Basidiomycota;c__Agaricomycetes;o__Polyporales;f__Fomitopsidaceae;g__Tyromyces;
unidentified_Geminibasidiales_sp	8e-06	2.1e-05	k__Fungi;p__Basidiomycota;c__Geminibasidiomycetes;o__Geminibasidiales;f__unidentified_Geminibasidiales_sp;g__unidentified_Geminibasidiales_sp;
Auxarthron	7.6e-05	2.1e-05	k__Fungi;p__Ascomycota;c__Eurotiomycetes;o__Onygenales;f__Onygenaceae;g__Auxarthron;
Neofusicoccum	2.5e-05	0	k__Fungi;p__Ascomycota;c__Dothideomycetes;o__Botryosphaeriales;f__Botryosphaeriaceae;g__Neofusicoccum;
unidentified_GS08_sp	8e-06	3e-05	k__Fungi;p__Rozellomycota;c__Rozellomycotina_cls_Incertae_sedis;o__GS08;f__unidentified_GS08_sp;g__unidentified_GS08_sp;
Tephrocybella	0	3.4e-05	k__Fungi;p__Basidiomycota;c__Agaricomycetes;o__Agaricales;f__Lyophyllaceae;g__Tephrocybella;
Scytalidium	8e-06	2.1e-05	k__Fungi;p__Ascomycota;c__Leotiomycetes;o__Helotiales;f__Helotiaceae;g__Scytalidium;
Pseudocoleophoma	0	2.5e-05	k__Fungi;p__Ascomycota;c__Dothideomycetes;o__Pleosporales;f__Dictyosporiaceae;g__Pseudocoleophoma;
Neohelicomyces	1.3e-05	2.1e-05	k__Fungi;p__Ascomycota;c__Dothideomycetes;o__Tubeufiales;f__Tubeufiaceae;g__Neohelicomyces;
Ascotaiwania	1.3e-05	2.1e-05	k__Fungi;p__Ascomycota;c__Sordariomycetes;o__Savoryellales;f__Savoryellaceae;g__Ascotaiwania;
Histoplasma	0	4.2e-05	k__Fungi;p__Ascomycota;c__Eurotiomycetes;o__Onygenales;f__Ajellomycetaceae;g__Histoplasma;
Torula	3.8e-05	3e-05	k__Fungi;p__Ascomycota;c__Dothideomycetes;o__Pleosporales;f__Torulaceae;g__Torula;
Neocallimastix	4e-06	1.7e-05	k__Fungi;p__Neocallimastigomycota;c__Neocallimastigomycetes;o__Neocallimastigales;f__Neocallimastigaceae;g__Neocallimastix;
unidentified_Cystobasidiomycetes_sp	0	1.7e-05	k__Fungi;p__Basidiomycota;c__Cystobasidiomycetes;o__unidentified_Cystobasidiomycetes_sp;f__unidentified_Cystobasidiomycetes_sp;g__unidentified_Cystobasidiomycetes_sp;
Bensingtonia	3.8e-05	2.5e-05	k__Fungi;p__Basidiomycota;c__Agaricostilbomycetes;o__Agaricostilbales;f__Kondoaceae;g__Bensingtonia;
Monascus	0	1.7e-05	k__Fungi;p__Ascomycota;c__Eurotiomycetes;o__Eurotiales;f__Aspergillaceae;g__Monascus;
Ruinenia	2.5e-05	2.1e-05	k__Fungi;p__Basidiomycota;c__Agaricostilbomycetes;o__Agaricostilbales;f__Ruineniaceae;g__Ruinenia;
Coprinellus	1.3e-05	1.7e-05	k__Fungi;p__Basidiomycota;c__Agaricomycetes;o__Agaricales;f__Psathyrellaceae;g__Coprinellus;
Paraphaeosphaeria	2.5e-05	3.8e-05	k__Fungi;p__Ascomycota;c__Dothideomycetes;o__Pleosporales;f__Didymosphaeriaceae;g__Paraphaeosphaeria;
Metschnikowia	2.5e-05	0	k__Fungi;p__Ascomycota;c__Saccharomycetes;o__Saccharomycetales;f__Metschnikowiaceae;g__Metschnikowia;
unidentified_Trechisporales_sp	4e-06	4.2e-05	k__Fungi;p__Basidiomycota;c__Agaricomycetes;o__Trechisporales;f__unidentified_Trechisporales_sp;g__unidentified_Trechisporales_sp;
Syncephalastrum	0	3.4e-05	k__Fungi;p__Mucoromycota;c__Mucoromycetes;o__Mucorales;f__Syncephalastraceae;g__Syncephalastrum;
Lecophagus	8e-06	3.4e-05	k__Fungi;p__Ascomycota;c__Orbiliomycetes;o__Orbiliales;f__Orbiliales_fam_Incertae_sedis;g__Lecophagus;
unidentified_Tremellales_sp	8e-06	3e-05	k__Fungi;p__Basidiomycota;c__Tremellomycetes;o__Tremellales;f__unidentified_Tremellales_sp;g__unidentified_Tremellales_sp;
Morchella	3e-05	4e-06	k__Fungi;p__Ascomycota;c__Pezizomycetes;o__Pezizales;f__Morchellaceae;g__Morchella;
Corynespora	0	1.7e-05	k__Fungi;p__Ascomycota;c__Dothideomycetes;o__Pleosporales;f__Corynesporascaceae;g__Corynespora;
unidentified_Microstromatales_sp	4e-06	3.4e-05	k__Fungi;p__Basidiomycota;c__Exobasidiomycetes;o__Microstromatales;f__unidentified_Microstromatales_sp;g__unidentified_Microstromatales_sp;
Graphilbum	1.7e-05	1.3e-05	k__Fungi;p__Ascomycota;c__Sordariomycetes;o__Ophiostomatales;f__Ophiostomataceae;g__Graphilbum;
Idriella	2.1e-05	1.3e-05	k__Fungi;p__Ascomycota;c__Sordariomycetes;o__Xylariales;f__Microdochiaceae;g__Idriella;
Hirsutella	1.7e-05	8e-06	k__Fungi;p__Ascomycota;c__Sordariomycetes;o__Hypocreales;f__Ophiocordycipitaceae;g__Hirsutella;
Terfezia	0	1.7e-05	k__Fungi;p__Ascomycota;c__Pezizomycetes;o__Pezizales;f__Pezizaceae;g__Terfezia;
Bulleribasidium	8e-06	1.7e-05	k__Fungi;p__Basidiomycota;c__Tremellomycetes;o__Tremellales;f__Bulleribasidiaceae;g__Bulleribasidium;
Bullera	0	1.7e-05	k__Fungi;p__Basidiomycota;c__Tremellomycetes;o__Tremellales;f__Bulleraceae;g__Bullera;
Ascosphaera	3.4e-05	0	k__Fungi;p__Ascomycota;c__Eurotiomycetes;o__Onygenales;f__Ascosphaeraceae;g__Ascosphaera;
Hyphodontia	0	1.7e-05	k__Fungi;p__Basidiomycota;c__Agaricomycetes;o__Hymenochaetales;f__Schizoporaceae;g__Hyphodontia;
Aaosphaeria	8e-06	2.5e-05	k__Fungi;p__Ascomycota;c__Dothideomycetes;o__Pleosporales;f__Pleosporales_fam_Incertae_sedis;g__Aaosphaeria;
Lysurus	2.5e-05	3.4e-05	k__Fungi;p__Basidiomycota;c__Agaricomycetes;o__Phallales;f__Phallaceae;g__Lysurus;
Stagonosporopsis	3e-05	3.4e-05	k__Fungi;p__Ascomycota;c__Dothideomycetes;o__Pleosporales;f__Didymellaceae;g__Stagonosporopsis;
Myxospora	6.3e-05	2.1e-05	k__Fungi;p__Ascomycota;c__Sordariomycetes;o__Hypocreales;f__Stachybotryaceae;g__Myxospora;
f__Dipodascaceae;g__unidentified	1.7e-05	0	k__Fungi;p__Ascomycota;c__Saccharomycetes;o__Saccharomycetales;f__Dipodascaceae;g__unidentified;
Fenestella	2.5e-05	4.2e-05	k__Fungi;p__Ascomycota;c__Dothideomycetes;o__Pleosporales;f__Fenestellaceae;g__Fenestella;
Hapsidospora	0	2.1e-05	k__Fungi;p__Ascomycota;c__Sordariomycetes;o__Hypocreales;f__Hypocreales_fam_Incertae_sedis;g__Hapsidospora;
Ramalina	2.1e-05	4e-06	k__Fungi;p__Ascomycota;c__Lecanoromycetes;o__Lecanorales;f__Ramalinaceae;g__Ramalina;
unidentified_Tremellodendropsidales_sp	3e-05	4e-06	k__Fungi;p__Basidiomycota;c__Agaricomycetes;o__Tremellodendropsidales;f__unidentified_Tremellodendropsidales_sp;g__unidentified_Tremellodendropsidales_sp;
Petractis	1.7e-05	0	k__Fungi;p__Ascomycota;c__Lecanoromycetes;o__Ostropales;f__Gyalectaceae;g__Petractis;
Gliomastix	1.3e-05	1.7e-05	k__Fungi;p__Ascomycota;c__Sordariomycetes;o__Hypocreales;f__Bionectriaceae;g__Gliomastix;
Lobulomyces	1.7e-05	4.2e-05	k__Fungi;p__Chytridiomycota;c__Lobulomycetes;o__Lobulomycetales;f__Lobulomycetaceae;g__Lobulomyces;
Parengyodontium	5.1e-05	3.8e-05	k__Fungi;p__Ascomycota;c__Sordariomycetes;o__Hypocreales;f__Cordycipitaceae;g__Parengyodontium;
unidentified_Glomeromycota_sp	3.4e-05	4e-06	k__Fungi;p__Glomeromycota;c__unidentified_Glomeromycota_sp;o__unidentified_Glomeromycota_sp;f__unidentified_Glomeromycota_sp;g__unidentified_Glomeromycota_sp;
Rhodotorula	1.7e-05	0	k__Fungi;p__Basidiomycota;c__Microbotryomycetes;o__Sporidiobolales;f__Sporidiobolaceae;g__Rhodotorula;
Ascodesmis	1.7e-05	3.8e-05	k__Fungi;p__Ascomycota;c__Pezizomycetes;o__Pezizales;f__Ascodesmidaceae;g__Ascodesmis;
unidentified_Eurotiales_sp	1.3e-05	3.8e-05	k__Fungi;p__Ascomycota;c__Eurotiomycetes;o__Eurotiales;f__unidentified_Eurotiales_sp;g__unidentified_Eurotiales_sp;
f__Ceratostomataceae;g__unidentified	1.3e-05	4e-06	k__Fungi;p__Ascomycota;c__Sordariomycetes;o__Melanosporales;f__Ceratostomataceae;g__unidentified;
Hyalorbilia	1.3e-05	8e-06	k__Fungi;p__Ascomycota;c__Orbiliomycetes;o__Orbiliales;f__Orbiliaceae;g__Hyalorbilia;
Crocicreas	2.5e-05	0	k__Fungi;p__Ascomycota;c__Leotiomycetes;o__Helotiales;f__Helotiaceae;g__Crocicreas;
Arthrophiala	8e-06	2.5e-05	k__Fungi;p__Ascomycota;c__Eurotiomycetes;o__Chaetothyriales;f__Chaetothyriaceae;g__Arthrophiala;
f__Cucurbitariaceae;g__unidentified	0	1.7e-05	k__Fungi;p__Ascomycota;c__Dothideomycetes;o__Pleosporales;f__Cucurbitariaceae;g__unidentified;
Macroconia	1.3e-05	4e-06	k__Fungi;p__Ascomycota;c__Sordariomycetes;o__Hypocreales;f__Nectriaceae;g__Macroconia;
Chaetosphaeria	4e-06	1.7e-05	k__Fungi;p__Ascomycota;c__Sordariomycetes;o__Chaetosphaeriales;f__Chaetosphaeriaceae;g__Chaetosphaeria;
Lepiota	2.1e-05	1.3e-05	k__Fungi;p__Basidiomycota;c__Agaricomycetes;o__Agaricales;f__Agaricaceae;g__Lepiota;
Conioscypha	1.3e-05	4e-06	k__Fungi;p__Ascomycota;c__Sordariomycetes;o__Conioscyphales;f__Conioscyphaceae;g__Conioscypha;
Paraboeremia	0	1.3e-05	k__Fungi;p__Ascomycota;c__Dothideomycetes;o__Pleosporales;f__Didymellaceae;g__Paraboeremia;
Ascochyta	2.1e-05	4e-06	k__Fungi;p__Ascomycota;c__Dothideomycetes;o__Pleosporales;f__Didymellaceae;g__Ascochyta;
Albonectria	1.3e-05	0	k__Fungi;p__Ascomycota;c__Sordariomycetes;o__Hypocreales;f__Nectriaceae;g__Albonectria;
Saksenaea	0	2.1e-05	k__Fungi;p__Mucoromycota;c__Mucoromycetes;o__Mucorales;f__Saksenaeaceae;g__Saksenaea;
Geopyxis	8e-06	1.3e-05	k__Fungi;p__Ascomycota;c__Pezizomycetes;o__Pezizales;f__Pyronemataceae;g__Geopyxis;
unidentified_Monoblepharidomycetes_sp	4e-06	2.1e-05	k__Fungi;p__Monoblepharomycota;c__Monoblepharidomycetes;o__unidentified_Monoblepharidomycetes_sp;f__unidentified_Monoblepharidomycetes_sp;g__unidentified_Monoblepharidomycetes_sp;
Striatibotrys	4e-06	1.3e-05	k__Fungi;p__Ascomycota;c__Sordariomycetes;o__Hypocreales;f__Stachybotryaceae;g__Striatibotrys;
Monilia	0	1.7e-05	k__Fungi;p__Ascomycota;c__Leotiomycetes;o__Helotiales;f__Sclerotiniaceae;g__Monilia;
Collarina	1.3e-05	1.7e-05	k__Fungi;p__Ascomycota;c__Sordariomycetes;o__Hypocreales;f__Clavicipitaceae;g__Collarina;
Tylopilus	0	1.3e-05	k__Fungi;p__Basidiomycota;c__Agaricomycetes;o__Boletales;f__Boletaceae;g__Tylopilus;
Pannaria	8e-06	1.3e-05	k__Fungi;p__Ascomycota;c__Lecanoromycetes;o__Peltigerales;f__Pannariaceae;g__Pannaria;
Myrmecridium	2.1e-05	8e-06	k__Fungi;p__Ascomycota;c__Sordariomycetes;o__Myrmecridiales;f__Myrmecridiaceae;g__Myrmecridium;
Dactylella	4e-06	2.1e-05	k__Fungi;p__Ascomycota;c__Orbiliomycetes;o__Orbiliales;f__Orbiliaceae;g__Dactylella;
Marasmius	0	1.3e-05	k__Fungi;p__Basidiomycota;c__Agaricomycetes;o__Agaricales;f__Marasmiaceae;g__Marasmius;
Atractospora	1.3e-05	0	k__Fungi;p__Ascomycota;c__Sordariomycetes;o__Myrmecridiales;f__Myrmecridiales_fam_Incertae_sedis;g__Atractospora;
Penicillifer	4e-06	1.3e-05	k__Fungi;p__Ascomycota;c__Sordariomycetes;o__Hypocreales;f__Nectriaceae;g__Penicillifer;
Piedraia	4e-06	3e-05	k__Fungi;p__Ascomycota;c__Dothideomycetes;o__Capnodiales;f__Piedraiaceae;g__Piedraia;
Scopuloides	1.3e-05	0	k__Fungi;p__Basidiomycota;c__Agaricomycetes;o__Polyporales;f__Meruliaceae;g__Scopuloides;
f__Myxotrichaceae;g__unidentified	1.3e-05	0	k__Fungi;p__Ascomycota;c__Leotiomycetes;o__Helotiales;f__Myxotrichaceae;g__unidentified;
unidentified_Branch03_sp	0	1.3e-05	k__Fungi;p__Rozellomycota;c__Rozellomycotina_cls_Incertae_sedis;o__Branch03;f__unidentified_Branch03_sp;g__unidentified_Branch03_sp;
Microdiplodia	0	1.3e-05	k__Fungi;p__Ascomycota;c__Dothideomycetes;o__Botryosphaeriales;f__Botryosphaeriaceae;g__Microdiplodia;
Didymella	2.1e-05	4e-06	k__Fungi;p__Ascomycota;c__Dothideomycetes;o__Pleosporales;f__Didymellaceae;g__Didymella;
Vararia	1.3e-05	0	k__Fungi;p__Basidiomycota;c__Agaricomycetes;o__Russulales;f__Lachnocladiaceae;g__Vararia;
Wallemia	1.3e-05	0	k__Fungi;p__Basidiomycota;c__Wallemiomycetes;o__Wallemiales;f__Wallemiaceae;g__Wallemia;
Malassezia	1.7e-05	0	k__Fungi;p__Basidiomycota;c__Malasseziomycetes;o__Malasseziales;f__Malasseziaceae;g__Malassezia;
Corallomycetella	1.3e-05	1.3e-05	k__Fungi;p__Ascomycota;c__Sordariomycetes;o__Hypocreales;f__Nectriaceae;g__Corallomycetella;
Farysia	4e-06	2.1e-05	k__Fungi;p__Basidiomycota;c__Ustilaginomycetes;o__Ustilaginales;f__Ustilaginaceae;g__Farysia;
Microdochium	8e-06	1.3e-05	k__Fungi;p__Ascomycota;c__Sordariomycetes;o__Xylariales;f__Microdochiaceae;g__Microdochium;
Gonapodya	1.3e-05	4e-06	k__Fungi;p__Monoblepharomycota;c__Monoblepharidomycetes;o__Monoblepharidales;f__Gonapodyaceae;g__Gonapodya;
Neopyrenochaeta	1.3e-05	1.3e-05	k__Fungi;p__Ascomycota;c__Dothideomycetes;o__Pleosporales;f__Pyrenochaetopsidaceae;g__Neopyrenochaeta;
Pseudopithomyces	0	2.1e-05	k__Fungi;p__Ascomycota;c__Dothideomycetes;o__Pleosporales;f__Didymosphaeriaceae;g__Pseudopithomyces;
Phialophora	1.3e-05	0	k__Fungi;p__Ascomycota;c__Eurotiomycetes;o__Chaetothyriales;f__Herpotrichiellaceae;g__Phialophora;
Cyphellophora	1.3e-05	0	k__Fungi;p__Ascomycota;c__Eurotiomycetes;o__Chaetothyriales;f__Cyphellophoraceae;g__Cyphellophora;
Xylodon	1.3e-05	1.3e-05	k__Fungi;p__Basidiomycota;c__Agaricomycetes;o__Hymenochaetales;f__Schizoporaceae;g__Xylodon;
Bolbitius	1.3e-05	0	k__Fungi;p__Basidiomycota;c__Agaricomycetes;o__Agaricales;f__Bolbitiaceae;g__Bolbitius;
Phylloporus	4e-06	2.1e-05	k__Fungi;p__Basidiomycota;c__Agaricomycetes;o__Boletales;f__Boletaceae;g__Phylloporus;
Thekopsora	1.3e-05	0	k__Fungi;p__Basidiomycota;c__Pucciniomycetes;o__Pucciniales;f__Pucciniastraceae;g__Thekopsora;
f__Corticiaceae;g__unidentified	0	1.3e-05	k__Fungi;p__Basidiomycota;c__Agaricomycetes;o__Corticiales;f__Corticiaceae;g__unidentified;
Flavodon	1.3e-05	2.1e-05	k__Fungi;p__Basidiomycota;c__Agaricomycetes;o__Polyporales;f__Irpicaceae;g__Flavodon;
Drepanopeziza	2.1e-05	0	k__Fungi;p__Ascomycota;c__Leotiomycetes;o__Helotiales;f__Dermateaceae;g__Drepanopeziza;
Fonsecazyma	2.1e-05	8e-06	k__Fungi;p__Basidiomycota;c__Tremellomycetes;o__Tremellales;f__Bulleraceae;g__Fonsecazyma;
Arthrographis	1.3e-05	2.1e-05	k__Fungi;p__Ascomycota;c__Dothideomycetes;o__Dothideomycetes_ord_Incertae_sedis;f__Eremomycetaceae;g__Arthrographis;
Nowakowskiella	4e-06	1.3e-05	k__Fungi;p__Chytridiomycota;c__Cladochytriomycetes;o__Cladochytriales;f__Nowakowskiellaceae;g__Nowakowskiella;
Cryptococcus	2.5e-05	3e-05	k__Fungi;p__Basidiomycota;c__Tremellomycetes;o__Tremellales;f__Tremellaceae;g__Cryptococcus;
Laetiporus	1.3e-05	0	k__Fungi;p__Basidiomycota;c__Agaricomycetes;o__Polyporales;f__Fomitopsidaceae;g__Laetiporus;
Phaeophleospora	1.3e-05	4e-06	k__Fungi;p__Ascomycota;c__Dothideomycetes;o__Capnodiales;f__Mycosphaerellaceae;g__Phaeophleospora;
Geopora	1.7e-05	0	k__Fungi;p__Ascomycota;c__Pezizomycetes;o__Pezizales;f__Pyronemataceae;g__Geopora;
unidentified_Leotiomycetes_sp	4e-06	1.3e-05	k__Fungi;p__Ascomycota;c__Leotiomycetes;o__unidentified_Leotiomycetes_sp;f__unidentified_Leotiomycetes_sp;g__unidentified_Leotiomycetes_sp;
f__Diversisporaceae;g__unidentified	0	1.3e-05	k__Fungi;p__Glomeromycota;c__Glomeromycetes;o__Diversisporales;f__Diversisporaceae;g__unidentified;
Gelasinospora	8e-06	4e-06	k__Fungi;p__Ascomycota;c__Sordariomycetes;o__Sordariales;f__Sordariaceae;g__Gelasinospora;
Cutaneotrichosporon	0	1.7e-05	k__Fungi;p__Basidiomycota;c__Tremellomycetes;o__Trichosporonales;f__Trichosporonaceae;g__Cutaneotrichosporon;
Mycoleptodiscus	0	8e-06	k__Fungi;p__Ascomycota;c__Sordariomycetes;o__Magnaporthales;f__Magnaporthaceae;g__Mycoleptodiscus;
Lasiobolidium	0	8e-06	k__Fungi;p__Ascomycota;c__Pezizomycetes;o__Pezizales;f__Pyronemataceae;g__Lasiobolidium;
Basidiobolus	0	8e-06	k__Fungi;p__Basidiobolomycota;c__Basidiobolomycetes;o__Basidiobolales;f__Basidiobolaceae;g__Basidiobolus;
unidentified_Lecanoromycetes_sp	8e-06	0	k__Fungi;p__Ascomycota;c__Lecanoromycetes;o__unidentified_Lecanoromycetes_sp;f__unidentified_Lecanoromycetes_sp;g__unidentified_Lecanoromycetes_sp;
Sampaiozyma	4e-06	8e-06	k__Fungi;p__Basidiomycota;c__Microbotryomycetes;o__Microbotryomycetes_ord_Incertae_sedis;f__Chrysozymaceae;g__Sampaiozyma;
Rachicladosporium	8e-06	8e-06	k__Fungi;p__Ascomycota;c__Dothideomycetes;o__Capnodiales;f__Cladosporiaceae;g__Rachicladosporium;
Tremella	1.7e-05	4e-06	k__Fungi;p__Basidiomycota;c__Tremellomycetes;o__Tremellales;f__Tremellaceae;g__Tremella;
Cirrenalia	4e-06	8e-06	k__Fungi;p__Ascomycota;c__Sordariomycetes;o__Microascales;f__Halosphaeriaceae;g__Cirrenalia;
unidentified_Filobasidiales_sp	8e-06	0	k__Fungi;p__Basidiomycota;c__Tremellomycetes;o__Filobasidiales;f__unidentified_Filobasidiales_sp;g__unidentified_Filobasidiales_sp;
Issatchenkia	1.7e-05	0	k__Fungi;p__Ascomycota;c__Saccharomycetes;o__Saccharomycetales;f__Saccharomycetaceae;g__Issatchenkia;
Vishniacozyma	8e-06	8e-06	k__Fungi;p__Basidiomycota;c__Tremellomycetes;o__Tremellales;f__Bulleribasidiaceae;g__Vishniacozyma;
f__Bolbitiaceae;g__unidentified	8e-06	4e-06	k__Fungi;p__Basidiomycota;c__Agaricomycetes;o__Agaricales;f__Bolbitiaceae;g__unidentified;
Moniliella	0	8e-06	k__Fungi;p__Basidiomycota;c__Moniliellomycetes;o__Moniliellales;f__Moniliellaceae;g__Moniliella;
Pleurostoma	1.7e-05	8e-06	k__Fungi;p__Ascomycota;c__Sordariomycetes;o__Calosphaeriales;f__Pleurostomataceae;g__Pleurostoma;
Tricholoma	8e-06	0	k__Fungi;p__Basidiomycota;c__Agaricomycetes;o__Agaricales;f__Tricholomataceae;g__Tricholoma;
Biscogniauxia	0	8e-06	k__Fungi;p__Ascomycota;c__Sordariomycetes;o__Xylariales;f__Xylariaceae;g__Biscogniauxia;
Pilobolus	0	8e-06	k__Fungi;p__Mucoromycota;c__Mucoromycetes;o__Mucorales;f__Pilobolaceae;g__Pilobolus;
Pyrenula	8e-06	1.3e-05	k__Fungi;p__Ascomycota;c__Eurotiomycetes;o__Pyrenulales;f__Pyrenulaceae;g__Pyrenula;
Dioszegia	4e-06	8e-06	k__Fungi;p__Basidiomycota;c__Tremellomycetes;o__Tremellales;f__Bulleribasidiaceae;g__Dioszegia;
Botryotrichum	4e-06	8e-06	k__Fungi;p__Ascomycota;c__Sordariomycetes;o__Sordariales;f__Chaetomiaceae;g__Botryotrichum;
Ramicandelaber	8e-06	0	k__Fungi;p__Kickxellomycota;c__Kickxellomycetes;o__Kickxellales;f__Kickxellaceae;g__Ramicandelaber;
f__Halotthiaceae;g__unidentified	8e-06	0	k__Fungi;p__Ascomycota;c__Dothideomycetes;o__Pleosporales;f__Halotthiaceae;g__unidentified;
Cystodendron	8e-06	0	k__Fungi;p__Ascomycota;c__Leotiomycetes;o__Helotiales;f__Helotiales_fam_Incertae_sedis;g__Cystodendron;
unidentified_Aphelidiomycota_sp	1.3e-05	1.3e-05	k__Fungi;p__Aphelidiomycota;c__unidentified_Aphelidiomycota_sp;o__unidentified_Aphelidiomycota_sp;f__unidentified_Aphelidiomycota_sp;g__unidentified_Aphelidiomycota_sp;
Ionaspis	8e-06	0	k__Fungi;p__Ascomycota;c__Lecanoromycetes;o__Hymeneliales;f__Hymeneliaceae;g__Ionaspis;
Leucocortinarius	1.3e-05	0	k__Fungi;p__Basidiomycota;c__Agaricomycetes;o__Agaricales;f__Cortinariaceae;g__Leucocortinarius;
Rickenella	0	1.3e-05	k__Fungi;p__Basidiomycota;c__Agaricomycetes;o__Hymenochaetales;f__Rickenellaceae;g__Rickenella;
Calceomyces	0	8e-06	k__Fungi;p__Ascomycota;c__Sordariomycetes;o__Xylariales;f__Xylariaceae;g__Calceomyces;
Graphium	1.3e-05	0	k__Fungi;p__Ascomycota;c__Sordariomycetes;o__Microascales;f__Graphiaceae;g__Graphium;
Oidiodendron	1.3e-05	0	k__Fungi;p__Ascomycota;c__Leotiomycetes;o__Helotiales;f__Myxotrichaceae;g__Oidiodendron;
Heterotextus	1.7e-05	0	k__Fungi;p__Basidiomycota;c__Dacrymycetes;o__Dacrymycetales;f__Dacrymycetaceae;g__Heterotextus;
Physalacria	8e-06	8e-06	k__Fungi;p__Basidiomycota;c__Agaricomycetes;o__Agaricales;f__Physalacriaceae;g__Physalacria;
Funneliformis	0	1.7e-05	k__Fungi;p__Glomeromycota;c__Glomeromycetes;o__Glomerales;f__Glomeraceae;g__Funneliformis;
Sugiyamaella	1.3e-05	4e-06	k__Fungi;p__Ascomycota;c__Saccharomycetes;o__Saccharomycetales;f__Trichomonascaceae;g__Sugiyamaella;
Badarisama	8e-06	4e-06	k__Fungi;p__Ascomycota;c__Pezizomycotina_cls_Incertae_sedis;o__Pezizomycotina_ord_Incertae_sedis;f__Pezizomycotina_fam_Incertae_sedis;g__Badarisama;
Valsaria	0	1.7e-05	k__Fungi;p__Ascomycota;c__Dothideomycetes;o__Valsariales;f__Valsariaceae;g__Valsaria;
f__Phaeosphaeriaceae;g__unidentified	1.3e-05	0	k__Fungi;p__Ascomycota;c__Dothideomycetes;o__Pleosporales;f__Phaeosphaeriaceae;g__unidentified;
Fusariella	8e-06	4e-06	k__Fungi;p__Ascomycota;c__Sordariomycetes;o__Hypocreales;f__Hypocreales_fam_Incertae_sedis;g__Fusariella;
Monacrosporium	8e-06	0	k__Fungi;p__Ascomycota;c__Orbiliomycetes;o__Orbiliales;f__Orbiliaceae;g__Monacrosporium;
Scutellinia	1.7e-05	8e-06	k__Fungi;p__Ascomycota;c__Pezizomycetes;o__Pezizales;f__Pyronemataceae;g__Scutellinia;
Postia	8e-06	0	k__Fungi;p__Basidiomycota;c__Agaricomycetes;o__Polyporales;f__Fomitopsidaceae;g__Postia;
Ganoderma	4e-06	1.3e-05	k__Fungi;p__Basidiomycota;c__Agaricomycetes;o__Polyporales;f__Ganodermataceae;g__Ganoderma;
Helicoma	0	8e-06	k__Fungi;p__Ascomycota;c__Dothideomycetes;o__Tubeufiales;f__Tubeufiaceae;g__Helicoma;
Phialomyces	0	8e-06	k__Fungi;p__Ascomycota;c__Eurotiomycetes;o__Eurotiales;f__Aspergillaceae;g__Phialomyces;
Pichia	1.3e-05	8e-06	k__Fungi;p__Ascomycota;c__Saccharomycetes;o__Saccharomycetales;f__Pichiaceae;g__Pichia;
Buellia	8e-06	4e-06	k__Fungi;p__Ascomycota;c__Lecanoromycetes;o__Caliciales;f__Caliciaceae;g__Buellia;
Leptoxyphium	0	8e-06	k__Fungi;p__Ascomycota;c__Dothideomycetes;o__Capnodiales;f__Capnodiaceae;g__Leptoxyphium;
Phycomyces	8e-06	0	k__Fungi;p__Mucoromycota;c__Mucoromycetes;o__Mucorales;f__Phycomycetaceae;g__Phycomyces;
Barbatospora	8e-06	4e-06	k__Fungi;p__Kickxellomycota;c__Barbatosporomycetes;o__Barbatosporales;f__Barbatosporaceae;g__Barbatospora;
Hydropunctaria	0	8e-06	k__Fungi;p__Ascomycota;c__Eurotiomycetes;o__Verrucariales;f__Verrucariaceae;g__Hydropunctaria;
Lipomyces	0	1.7e-05	k__Fungi;p__Ascomycota;c__Saccharomycetes;o__Saccharomycetales;f__Lipomycetaceae;g__Lipomyces;
Lapidomyces	8e-06	8e-06	k__Fungi;p__Ascomycota;c__Dothideomycetes;o__Capnodiales;f__Teratosphaeriaceae;g__Lapidomyces;
Spegazzinia	1.3e-05	0	k__Fungi;p__Ascomycota;c__Dothideomycetes;o__Pleosporales;f__Didymosphaeriaceae;g__Spegazzinia;
Trichosporon	1.3e-05	4e-06	k__Fungi;p__Basidiomycota;c__Tremellomycetes;o__Trichosporonales;f__Trichosporonaceae;g__Trichosporon;
Phanerochaete	0	8e-06	k__Fungi;p__Basidiomycota;c__Agaricomycetes;o__Polyporales;f__Phanerochaetaceae;g__Phanerochaete;
Wardomyces	4e-06	1.3e-05	k__Fungi;p__Ascomycota;c__Sordariomycetes;o__Microascales;f__Microascales_fam_Incertae_sedis;g__Wardomyces;
f__Chytridiaceae;g__unidentified	0	2.1e-05	k__Fungi;p__Chytridiomycota;c__Chytridiomycetes;o__Chytridiales;f__Chytridiaceae;g__unidentified;
Panaeolus	0	1.7e-05	k__Fungi;p__Basidiomycota;c__Agaricomycetes;o__Agaricales;f__Bolbitiaceae;g__Panaeolus;
Athelia	0	1.7e-05	k__Fungi;p__Basidiomycota;c__Agaricomycetes;o__Atheliales;f__Atheliaceae;g__Athelia;
unidentified_Capnodiales_sp	0	8e-06	k__Fungi;p__Ascomycota;c__Dothideomycetes;o__Capnodiales;f__unidentified_Capnodiales_sp;g__unidentified_Capnodiales_sp;
f__Ceratobasidiaceae;g__unidentified	0	8e-06	k__Fungi;p__Basidiomycota;c__Agaricomycetes;o__Cantharellales;f__Ceratobasidiaceae;g__unidentified;
Leucangium	1.3e-05	0	k__Fungi;p__Ascomycota;c__Pezizomycetes;o__Pezizales;f__Discinaceae;g__Leucangium;
Anixiopsis	8e-06	2.1e-05	k__Fungi;p__Ascomycota;c__Eurotiomycetes;o__Onygenales;f__Onygenaceae;g__Anixiopsis;
Multifurca	8e-06	8e-06	k__Fungi;p__Basidiomycota;c__Agaricomycetes;o__Russulales;f__Russulaceae;g__Multifurca;
f__Onygenaceae;g__unidentified	8e-06	8e-06	k__Fungi;p__Ascomycota;c__Eurotiomycetes;o__Onygenales;f__Onygenaceae;g__unidentified;
unidentified_Sebacinales_sp	8e-06	0	k__Fungi;p__Basidiomycota;c__Agaricomycetes;o__Sebacinales;f__unidentified_Sebacinales_sp;g__unidentified_Sebacinales_sp;
Ustilaginoidea	1.3e-05	8e-06	k__Fungi;p__Ascomycota;c__Sordariomycetes;o__Hypocreales;f__Hypocreales_fam_Incertae_sedis;g__Ustilaginoidea;
Boletus	0	1.3e-05	k__Fungi;p__Basidiomycota;c__Agaricomycetes;o__Boletales;f__Boletaceae;g__Boletus;
Camarophyllopsis	8e-06	0	k__Fungi;p__Basidiomycota;c__Agaricomycetes;o__Agaricales;f__Clavariaceae;g__Camarophyllopsis;
Parastagonospora	8e-06	0	k__Fungi;p__Ascomycota;c__Dothideomycetes;o__Pleosporales;f__Phaeosphaeriaceae;g__Parastagonospora;
Setophaeosphaeria	0	8e-06	k__Fungi;p__Ascomycota;c__Dothideomycetes;o__Pleosporales;f__Phaeosphaeriaceae;g__Setophaeosphaeria;
Hypoxylon	1.3e-05	0	k__Fungi;p__Ascomycota;c__Sordariomycetes;o__Xylariales;f__Xylariaceae;g__Hypoxylon;
Conlarium	0	8e-06	k__Fungi;p__Ascomycota;c__Sordariomycetes;o__Sordariales;f__Sordariales_fam_Incertae_sedis;g__Conlarium;
Candelabrum	0	8e-06	k__Fungi;p__Ascomycota;c__Pezizomycotina_cls_Incertae_sedis;o__Pezizomycotina_ord_Incertae_sedis;f__Pezizomycotina_fam_Incertae_sedis;g__Candelabrum;
Atractium	1.7e-05	4e-06	k__Fungi;p__Ascomycota;c__Sordariomycetes;o__Hypocreales;f__Nectriaceae;g__Atractium;
Angulomyces	0	8e-06	k__Fungi;p__Chytridiomycota;c__Rhizophydiomycetes;o__Rhizophydiales;f__Angulomycetaceae;g__Angulomyces;
Amaurascopsis	1.7e-05	0	k__Fungi;p__Ascomycota;c__Eurotiomycetes;o__Onygenales;f__Onygenaceae;g__Amaurascopsis;
Thysanorea	8e-06	4e-06	k__Fungi;p__Ascomycota;c__Eurotiomycetes;o__Chaetothyriales;f__Herpotrichiellaceae;g__Thysanorea;
Pithya	8e-06	8e-06	k__Fungi;p__Ascomycota;c__Pezizomycetes;o__Pezizales;f__Sarcoscyphaceae;g__Pithya;
Sympodiella	8e-06	8e-06	k__Fungi;p__Ascomycota;c__Dothideomycetes;o__Venturiales;f__Venturiaceae;g__Sympodiella;
Polyporus	0	8e-06	k__Fungi;p__Basidiomycota;c__Agaricomycetes;o__Polyporales;f__Polyporaceae;g__Polyporus;
Albifimbria	4e-06	0	k__Fungi;p__Ascomycota;c__Sordariomycetes;o__Hypocreales;f__Stachybotryaceae;g__Albifimbria;
Gautieria	4e-06	0	k__Fungi;p__Basidiomycota;c__Agaricomycetes;o__Gomphales;f__Gautieriaceae;g__Gautieria;
Xerocomellus	4e-06	0	k__Fungi;p__Basidiomycota;c__Agaricomycetes;o__Boletales;f__Boletaceae;g__Xerocomellus;
unidentified_Glomeromycetes_sp	0	4e-06	k__Fungi;p__Glomeromycota;c__Glomeromycetes;o__unidentified_Glomeromycetes_sp;f__unidentified_Glomeromycetes_sp;g__unidentified_Glomeromycetes_sp;
f__Geastraceae;g__unidentified	0	8e-06	k__Fungi;p__Basidiomycota;c__Agaricomycetes;o__Geastrales;f__Geastraceae;g__unidentified;
Golubevia	4e-06	0	k__Fungi;p__Basidiomycota;c__Exobasidiomycetes;o__Golubeviales;f__Golubeviaceae;g__Golubevia;
unidentified_Taphrinales_sp	0	4e-06	k__Fungi;p__Ascomycota;c__Taphrinomycetes;o__Taphrinales;f__unidentified_Taphrinales_sp;g__unidentified_Taphrinales_sp;
unidentified_Boletales_sp	4e-06	4e-06	k__Fungi;p__Basidiomycota;c__Agaricomycetes;o__Boletales;f__unidentified_Boletales_sp;g__unidentified_Boletales_sp;
Erysiphe	4e-06	4e-06	k__Fungi;p__Ascomycota;c__Leotiomycetes;o__Erysiphales;f__Erysiphaceae;g__Erysiphe;
Parascedosporium	0	4e-06	k__Fungi;p__Ascomycota;c__Sordariomycetes;o__Microascales;f__Microascaceae;g__Parascedosporium;
Mycena	4e-06	8e-06	k__Fungi;p__Basidiomycota;c__Agaricomycetes;o__Agaricales;f__Tricholomataceae;g__Mycena;
Verrucaria	0	4e-06	k__Fungi;p__Ascomycota;c__Eurotiomycetes;o__Verrucariales;f__Verrucariaceae;g__Verrucaria;
unidentified_GS21_sp	0	8e-06	k__Fungi;p__Mucoromycota;c__Endogonomycetes;o__GS21;f__unidentified_GS21_sp;g__unidentified_GS21_sp;
Loreleia	4e-06	0	k__Fungi;p__Basidiomycota;c__Agaricomycetes;o__Hymenochaetales;f__Hymenochaetales_fam_Incertae_sedis;g__Loreleia;
Phyllachora	4e-06	0	k__Fungi;p__Ascomycota;c__Sordariomycetes;o__Phyllachorales;f__Phyllachoraceae;g__Phyllachora;
Camarosporidiella	4e-06	0	k__Fungi;p__Ascomycota;c__Dothideomycetes;o__Pleosporales;f__Camarosporidiellaceae;g__Camarosporidiella;
Psora	8e-06	4e-06	k__Fungi;p__Ascomycota;c__Lecanoromycetes;o__Lecanorales;f__Psoraceae;g__Psora;
unidentified_Pezizales_sp	8e-06	4e-06	k__Fungi;p__Ascomycota;c__Pezizomycetes;o__Pezizales;f__unidentified_Pezizales_sp;g__unidentified_Pezizales_sp;
Phaeotremella	8e-06	0	k__Fungi;p__Basidiomycota;c__Tremellomycetes;o__Tremellales;f__Phaeotremellaceae;g__Phaeotremella;
f__Olpidiaceae;g__unidentified	4e-06	0	k__Fungi;p__Olpidiomycota;c__Olpidiomycetes;o__Olpidiales;f__Olpidiaceae;g__unidentified;
Acrostalagmus	8e-06	0	k__Fungi;p__Ascomycota;c__Sordariomycetes;o__Glomerellales;f__Plectosphaerellaceae;g__Acrostalagmus;
Isthmolongispora	4e-06	0	k__Fungi;p__Ascomycota;c__Pezizomycotina_cls_Incertae_sedis;o__Pezizomycotina_ord_Incertae_sedis;f__Pezizomycotina_fam_Incertae_sedis;g__Isthmolongispora;
Trematosphaeria	0	4e-06	k__Fungi;p__Ascomycota;c__Dothideomycetes;o__Pleosporales;f__Trematosphaeriaceae;g__Trematosphaeria;
Phaeosphaeriopsis	4e-06	0	k__Fungi;p__Ascomycota;c__Dothideomycetes;o__Pleosporales;f__Phaeosphaeriaceae;g__Phaeosphaeriopsis;
Saturnispora	0	4e-06	k__Fungi;p__Ascomycota;c__Saccharomycetes;o__Saccharomycetales;f__Pichiaceae;g__Saturnispora;
Yamadamyces	4e-06	0	k__Fungi;p__Basidiomycota;c__Microbotryomycetes;o__Kriegeriales;f__Kriegeriaceae;g__Yamadamyces;
Savoryella	0	4e-06	k__Fungi;p__Ascomycota;c__Sordariomycetes;o__Savoryellales;f__Savoryellaceae;g__Savoryella;
Geniculifera	4e-06	0	k__Fungi;p__Ascomycota;c__Orbiliomycetes;o__Orbiliales;f__Orbiliaceae;g__Geniculifera;
Cadophora	0	4e-06	k__Fungi;p__Ascomycota;c__Leotiomycetes;o__Helotiales;f__Helotiales_fam_Incertae_sedis;g__Cadophora;
Yarrowia	4e-06	0	k__Fungi;p__Ascomycota;c__Saccharomycetes;o__Saccharomycetales;f__Dipodascaceae;g__Yarrowia;
unidentified_GS15_sp	0	8e-06	k__Fungi;p__Blastocladiomycota;c__Blastocladiomycetes;o__GS15;f__unidentified_GS15_sp;g__unidentified_GS15_sp;
Davidiellomyces	0	4e-06	k__Fungi;p__Ascomycota;c__Dothideomycetes;o__Capnodiales;f__Cladosporiaceae;g__Davidiellomyces;
Acaulospora	0	4e-06	k__Fungi;p__Glomeromycota;c__Glomeromycetes;o__Diversisporales;f__Acaulosporaceae;g__Acaulospora;
unidentified_Cantharellales_sp	4e-06	0	k__Fungi;p__Basidiomycota;c__Agaricomycetes;o__Cantharellales;f__unidentified_Cantharellales_sp;g__unidentified_Cantharellales_sp;
Microascus	0	4e-06	k__Fungi;p__Ascomycota;c__Sordariomycetes;o__Microascales;f__Microascaceae;g__Microascus;
Sticta	4e-06	8e-06	k__Fungi;p__Ascomycota;c__Lecanoromycetes;o__Peltigerales;f__Lobariaceae;g__Sticta;
Crustoderma	8e-06	0	k__Fungi;p__Basidiomycota;c__Agaricomycetes;o__Polyporales;f__Polyporales_fam_Incertae_sedis;g__Crustoderma;
Godronia	0	4e-06	k__Fungi;p__Ascomycota;c__Leotiomycetes;o__Helotiales;f__Helotiaceae;g__Godronia;
Cephalotrichiella	4e-06	0	k__Fungi;p__Ascomycota;c__Sordariomycetes;o__Microascales;f__Microascales_fam_Incertae_sedis;g__Cephalotrichiella;
Lentinula	4e-06	0	k__Fungi;p__Basidiomycota;c__Agaricomycetes;o__Agaricales;f__Omphalotaceae;g__Lentinula;
Paraphysoderma	4e-06	0	k__Fungi;p__Blastocladiomycota;c__Blastocladiomycetes;o__Blastocladiales;f__Physodermataceae;g__Paraphysoderma;
Chaetosphaeronema	4e-06	0	k__Fungi;p__Ascomycota;c__Dothideomycetes;o__Pleosporales;f__Phaeosphaeriaceae;g__Chaetosphaeronema;
Perusta	4e-06	0	k__Fungi;p__Ascomycota;c__Dothideomycetes;o__Dothideales;f__Dothioraceae;g__Perusta;
Pseudotomentella	0	4e-06	k__Fungi;p__Basidiomycota;c__Agaricomycetes;o__Thelephorales;f__Thelephoraceae;g__Pseudotomentella;
Bovista	0	4e-06	k__Fungi;p__Basidiomycota;c__Agaricomycetes;o__Agaricales;f__Lycoperdaceae;g__Bovista;
Lectera	4e-06	0	k__Fungi;p__Ascomycota;c__Sordariomycetes;o__Glomerellales;f__Plectosphaerellaceae;g__Lectera;
Melampsora	4e-06	0	k__Fungi;p__Basidiomycota;c__Pucciniomycetes;o__Pucciniales;f__Melampsoraceae;g__Melampsora;
Metapochonia	4e-06	0	k__Fungi;p__Ascomycota;c__Sordariomycetes;o__Hypocreales;f__Clavicipitaceae;g__Metapochonia;
Cochliobolus	0	4e-06	k__Fungi;p__Ascomycota;c__Dothideomycetes;o__Pleosporales;f__Pleosporaceae;g__Cochliobolus;
Trichothecium	4e-06	4e-06	k__Fungi;p__Ascomycota;c__Sordariomycetes;o__Hypocreales;f__Hypocreales_fam_Incertae_sedis;g__Trichothecium;
Stereum	4e-06	4e-06	k__Fungi;p__Basidiomycota;c__Agaricomycetes;o__Russulales;f__Stereaceae;g__Stereum;
Melanocarpus	4e-06	4e-06	k__Fungi;p__Ascomycota;c__Sordariomycetes;o__Sordariales;f__Chaetomiaceae;g__Melanocarpus;
Oculimacula	4e-06	4e-06	k__Fungi;p__Ascomycota;c__Leotiomycetes;o__Helotiales;f__Dermateaceae;g__Oculimacula;
Gongronella	0	4e-06	k__Fungi;p__Mucoromycota;c__Mucoromycetes;o__Mucorales;f__Cunninghamellaceae;g__Gongronella;
Ophiocordyceps	0	4e-06	k__Fungi;p__Ascomycota;c__Sordariomycetes;o__Hypocreales;f__Ophiocordycipitaceae;g__Ophiocordyceps;
Lecanora	4e-06	0	k__Fungi;p__Ascomycota;c__Lecanoromycetes;o__Lecanorales;f__Lecanoraceae;g__Lecanora;
Lactifluus	8e-06	0	k__Fungi;p__Basidiomycota;c__Agaricomycetes;o__Russulales;f__Russulaceae;g__Lactifluus;
Diutina	4e-06	0	k__Fungi;p__Ascomycota;c__Saccharomycetes;o__Saccharomycetales;f__Saccharomycetales_fam_Incertae_sedis;g__Diutina;
Podosphaera	4e-06	0	k__Fungi;p__Ascomycota;c__Leotiomycetes;o__Erysiphales;f__Erysiphaceae;g__Podosphaera;
f__Clavicipitaceae;g__unidentified	0	4e-06	k__Fungi;p__Ascomycota;c__Sordariomycetes;o__Hypocreales;f__Clavicipitaceae;g__unidentified;
Septoglomus	8e-06	0	k__Fungi;p__Glomeromycota;c__Glomeromycetes;o__Glomerales;f__Glomeraceae;g__Septoglomus;
Podoscypha	0	4e-06	k__Fungi;p__Basidiomycota;c__Agaricomycetes;o__Polyporales;f__Podoscyphaceae;g__Podoscypha;
Botrytis	4e-06	4e-06	k__Fungi;p__Ascomycota;c__Leotiomycetes;o__Helotiales;f__Sclerotiniaceae;g__Botrytis;
unidentified_GS22_sp	4e-06	4e-06	k__Fungi;p__Mucoromycota;c__Endogonomycetes;o__GS22;f__unidentified_GS22_sp;g__unidentified_GS22_sp;
Pseudotruncatella	0	4e-06	k__Fungi;p__Ascomycota;c__Sordariomycetes;o__Xylariales;f__Bartaliniaceae;g__Pseudotruncatella;
Xenochalara	4e-06	0	k__Fungi;p__Ascomycota;c__Leotiomycetes;o__Helotiales;f__Helotiales_fam_Incertae_sedis;g__Xenochalara;
Helicogloea	0	4e-06	k__Fungi;p__Basidiomycota;c__Atractiellomycetes;o__Atractiellales;f__Atractiellales_fam_Incertae_sedis;g__Helicogloea;
Microsporum	4e-06	0	k__Fungi;p__Ascomycota;c__Eurotiomycetes;o__Onygenales;f__Arthrodermataceae;g__Microsporum;
Apophysomyces	0	0	k__Fungi;p__Mucoromycota;c__Mucoromycetes;o__Mucorales;f__Mucoraceae;g__Apophysomyces;
Hansfordia	0	0	k__Fungi;p__Ascomycota;c__Sordariomycetes;o__Xylariales;f__Xylariales_fam_Incertae_sedis;g__Hansfordia;
Pseudocercospora	0	0	k__Fungi;p__Ascomycota;c__Dothideomycetes;o__Capnodiales;f__Mycosphaerellaceae;g__Pseudocercospora;
Others	0.122898	0.131049	Others
