# Supplementary material for: Effects of monocropping soil on plant growth and rhizosphere microbial community structure of Salvia miltiorrhiza Bge
Source: PeerJ. 2025 Nov 28;13:e20379. doi: 10.7717/peerj.20379 (PMC12667696; doi:10.7717/peerj.20379)
Supplement: Supplemental Information 6 [file peerj-13-20379-s006.xlsx]

## Sheet: otu_table_group.s.relative
Taxonomy	NS	MS	Tax_detail
Lecythophora_sp	0.233429	0.164647	k__Fungi;p__Ascomycota;c__Sordariomycetes;o__Coniochaetales;f__Coniochaetaceae;g__Lecythophora;s__Lecythophora_sp;
Thelephora_terrestris	0.044941	0.000571	k__Fungi;p__Basidiomycota;c__Agaricomycetes;o__Thelephorales;f__Thelephoraceae;g__Thelephora;s__Thelephora_terrestris;
Arthrobotrys_amerospora	0.102858	0.060263	k__Fungi;p__Ascomycota;c__Orbiliomycetes;o__Orbiliales;f__Orbiliaceae;g__Arthrobotrys;s__Arthrobotrys_amerospora;
Mortierella_polycephala	0.005196	0.100727	k__Fungi;p__Mortierellomycota;c__Mortierellomycetes;o__Mortierellales;f__Mortierellaceae;g__Mortierella;s__Mortierella_polycephala;
Lophotrichus_sp	0.002372	0.074054	k__Fungi;p__Ascomycota;c__Sordariomycetes;o__Microascales;f__Microascaceae;g__Lophotrichus;s__Lophotrichus_sp;
Mortierella_alpina	0.066321	0.035539	k__Fungi;p__Mortierellomycota;c__Mortierellomycetes;o__Mortierellales;f__Mortierellaceae;g__Mortierella;s__Mortierella_alpina;
Cladosporium_sp	0.066727	0.010003	k__Fungi;p__Ascomycota;c__Dothideomycetes;o__Capnodiales;f__Cladosporiaceae;g__Cladosporium;s__Cladosporium_sp;
Penicillium_commune	0.022674	0.036473	k__Fungi;p__Ascomycota;c__Eurotiomycetes;o__Eurotiales;f__Aspergillaceae;g__Penicillium;s__Penicillium_commune;
Mortierella_stylospora	0.001953	0.042861	k__Fungi;p__Mortierellomycota;c__Mortierellomycetes;o__Mortierellales;f__Mortierellaceae;g__Mortierella;s__Mortierella_stylospora;
Archaeorhizomyces_sp	0.01262	0.000364	k__Fungi;p__Ascomycota;c__Archaeorhizomycetes;o__Archaeorhizomycetales;f__Archaeorhizomycetaceae;g__Archaeorhizomyces;s__Archaeorhizomyces_sp;
Conocybe_pubescens	0.003238	0.03455	k__Fungi;p__Basidiomycota;c__Agaricomycetes;o__Agaricales;f__Bolbitiaceae;g__Conocybe;s__Conocybe_pubescens;
Rhizophlyctis_sp	0.000207	0.008798	k__Fungi;p__Chytridiomycota;c__Rhizophlyctidomycetes;o__Rhizophlyctidales;f__Rhizophlyctidaceae;g__Rhizophlyctis;s__Rhizophlyctis_sp;
Aniptodera_chesapeakensis	0.025143	0.013068	k__Fungi;p__Ascomycota;c__Sordariomycetes;o__Microascales;f__Halosphaeriaceae;g__Aniptodera;s__Aniptodera_chesapeakensis;
Coniothyrium_sp	0.000495	0.008866	k__Fungi;p__Ascomycota;c__Dothideomycetes;o__Pleosporales;f__Coniothyriaceae;g__Coniothyrium;s__Coniothyrium_sp;
Fusarium_sp	0.028487	0.027333	k__Fungi;p__Ascomycota;c__Sordariomycetes;o__Hypocreales;f__Nectriaceae;g__Fusarium;s__Fusarium_sp;
Aspergillus_sydowii	0.01686	0.001192	k__Fungi;p__Ascomycota;c__Eurotiomycetes;o__Eurotiales;f__Aspergillaceae;g__Aspergillus;s__Aspergillus_sydowii;
Alternaria_alternata	0.000537	0.006329	k__Fungi;p__Ascomycota;c__Dothideomycetes;o__Pleosporales;f__Pleosporaceae;g__Alternaria;s__Alternaria_alternata;
Humicola_insolens	0.016789	0.008815	k__Fungi;p__Ascomycota;c__Sordariomycetes;o__Sordariales;f__Chaetomiaceae;g__Humicola;s__Humicola_insolens;
Humicola_sp	0.010248	0.017275	k__Fungi;p__Ascomycota;c__Sordariomycetes;o__Sordariales;f__Chaetomiaceae;g__Humicola;s__Humicola_sp;
Geomyces_sp	0.017296	0.009885	k__Fungi;p__Ascomycota;c__Leotiomycetes;o__Thelebolales;f__Pseudeurotiaceae;g__Geomyces;s__Geomyces_sp;
Mortierella_sp	0.014201	0.018112	k__Fungi;p__Mortierellomycota;c__Mortierellomycetes;o__Mortierellales;f__Mortierellaceae;g__Mortierella;s__Mortierella_sp;
Diaporthe_sojae	3e-05	0.00416	k__Fungi;p__Ascomycota;c__Sordariomycetes;o__Diaporthales;f__Diaporthaceae;g__Diaporthe;s__Diaporthe_sojae;
Gibberella_intricans	0.016518	0.010007	k__Fungi;p__Ascomycota;c__Sordariomycetes;o__Hypocreales;f__Nectriaceae;g__Gibberella;s__Gibberella_intricans;
Chaetomium_piluliferum	0.002964	0.014205	k__Fungi;p__Ascomycota;c__Sordariomycetes;o__Sordariales;f__Chaetomiaceae;g__Chaetomium;s__Chaetomium_piluliferum;
Solicoccozyma_terrea	0.000816	0.01177	k__Fungi;p__Basidiomycota;c__Tremellomycetes;o__Filobasidiales;f__Piskurozymaceae;g__Solicoccozyma;s__Solicoccozyma_terrea;
Macroventuria_wentii	0.011863	0.006519	k__Fungi;p__Ascomycota;c__Dothideomycetes;o__Pleosporales;f__Didymellaceae;g__Macroventuria;s__Macroventuria_wentii;
Cladosporium_sphaerospermum	0.012802	0.000867	k__Fungi;p__Ascomycota;c__Dothideomycetes;o__Capnodiales;f__Cladosporiaceae;g__Cladosporium;s__Cladosporium_sphaerospermum;
Eurotium_sp	0.00671	0.000203	k__Fungi;p__Ascomycota;c__Eurotiomycetes;o__Eurotiales;f__Aspergillaceae;g__Eurotium;s__Eurotium_sp;
Aspergillus_sp	0.010502	0.001087	k__Fungi;p__Ascomycota;c__Eurotiomycetes;o__Eurotiales;f__Aspergillaceae;g__Aspergillus;s__Aspergillus_sp;
Solicoccozyma_sp	0.010662	0.009529	k__Fungi;p__Basidiomycota;c__Tremellomycetes;o__Filobasidiales;f__Piskurozymaceae;g__Solicoccozyma;s__Solicoccozyma_sp;
Hyaloscyphaceae_sp	0.002909	5.5e-05	k__Fungi;p__Ascomycota;c__Leotiomycetes;o__Helotiales;f__Hyaloscyphaceae;g__unidentified;s__Hyaloscyphaceae_sp;
Coprinopsis_cinerea	0.002566	3e-05	k__Fungi;p__Basidiomycota;c__Agaricomycetes;o__Agaricales;f__Psathyrellaceae;g__Coprinopsis;s__Coprinopsis_cinerea;
Aspergillus_carbonarius	0.006308	0.002177	k__Fungi;p__Ascomycota;c__Eurotiomycetes;o__Eurotiales;f__Aspergillaceae;g__Aspergillus;s__Aspergillus_carbonarius;
Plectosphaerella_sp	0.007031	0.007479	k__Fungi;p__Ascomycota;c__Sordariomycetes;o__Glomerellales;f__Plectosphaerellaceae;g__Plectosphaerella;s__Plectosphaerella_sp;
Stegocintractia_luzulae	0.00493	0.003344	k__Fungi;p__Basidiomycota;c__Ustilaginomycetes;o__Ustilaginales;f__Ustilaginaceae;g__Stegocintractia;s__Stegocintractia_luzulae;
Mortierellaceae_sp	0.002642	0.006874	k__Fungi;p__Mortierellomycota;c__Mortierellomycetes;o__Mortierellales;f__Mortierellaceae;g__unidentified;s__Mortierellaceae_sp;
Trichurus_spiralis	0.00074	0.00257	k__Fungi;p__Ascomycota;c__Sordariomycetes;o__Microascales;f__Microascales_fam_Incertae_sedis;g__Trichurus;s__Trichurus_spiralis;
Fusicolla_acetilerea	0.000393	0.004841	k__Fungi;p__Ascomycota;c__Sordariomycetes;o__Hypocreales;f__Nectriaceae;g__Fusicolla;s__Fusicolla_acetilerea;
Trichocladium_griseum	0.000423	0.005517	k__Fungi;p__Ascomycota;c__Sordariomycetes;o__Sordariales;f__Chaetomiaceae;g__Trichocladium;s__Trichocladium_griseum;
Piloderma_sp	4e-06	0.001577	k__Fungi;p__Basidiomycota;c__Agaricomycetes;o__Atheliales;f__Atheliaceae;g__Piloderma;s__Piloderma_sp;
Gyromitra_sp	2.5e-05	0.002046	k__Fungi;p__Ascomycota;c__Pezizomycetes;o__Pezizales;f__Discinaceae;g__Gyromitra;s__Gyromitra_sp;
Papulaspora_sepedonioides	0.000372	0.004008	k__Fungi;p__Ascomycota;c__Sordariomycetes;o__Sordariales;f__Sordariales_fam_Incertae_sedis;g__Papulaspora;s__Papulaspora_sepedonioides;
Zoopagales_sp	0.003315	0.002486	k__Fungi;p__Zoopagomycota;c__Zoopagomycetes;o__Zoopagales;f__unidentified_Zoopagales_sp;g__unidentified_Zoopagales_sp;s__Zoopagales_sp;
Coniochaetales_sp	0.003226	0.001797	k__Fungi;p__Ascomycota;c__Sordariomycetes;o__Coniochaetales;f__unidentified_Coniochaetales_sp;g__unidentified_Coniochaetales_sp;s__Coniochaetales_sp;
Helotiales_sp	0.001247	8.9e-05	k__Fungi;p__Ascomycota;c__Leotiomycetes;o__Helotiales;f__unidentified_Helotiales_sp;g__unidentified_Helotiales_sp;s__Helotiales_sp;
Rhizophlyctis_rosea	7.2e-05	0.001421	k__Fungi;p__Chytridiomycota;c__Rhizophlyctidomycetes;o__Rhizophlyctidales;f__Rhizophlyctidaceae;g__Rhizophlyctis;s__Rhizophlyctis_rosea;
Cystofilobasidium_sp	0.003649	0.001983	k__Fungi;p__Basidiomycota;c__Tremellomycetes;o__Cystofilobasidiales;f__Cystofilobasidiaceae;g__Cystofilobasidium;s__Cystofilobasidium_sp;
Pleosporales_sp	0.001142	0.000245	k__Fungi;p__Ascomycota;c__Dothideomycetes;o__Pleosporales;f__unidentified_Pleosporales_sp;g__unidentified_Pleosporales_sp;s__Pleosporales_sp;
Penicillium_decumbens	0.000144	0.001852	k__Fungi;p__Ascomycota;c__Eurotiomycetes;o__Eurotiales;f__Aspergillaceae;g__Penicillium;s__Penicillium_decumbens;
Ulkenomyces_aestuarii	0.001087	0.001471	k__Fungi;p__Chytridiomycota;c__Rhizophydiomycetes;o__Rhizophydiales;f__Halomycetaceae;g__Ulkenomyces;s__Ulkenomyces_aestuarii;
Biappendiculispora_sp	0.000681	0.001484	k__Fungi;p__Ascomycota;c__Dothideomycetes;o__Pleosporales;f__Lophiostomataceae;g__Biappendiculispora;s__Biappendiculispora_sp;
Powellomycetaceae_sp	0.000478	0.00145	k__Fungi;p__Chytridiomycota;c__Spizellomycetes;o__Spizellomycetales;f__Powellomycetaceae;g__unidentified;s__Powellomycetaceae_sp;
Chaetomiaceae_sp	0.000283	0.002072	k__Fungi;p__Ascomycota;c__Sordariomycetes;o__Sordariales;f__Chaetomiaceae;g__unidentified;s__Chaetomiaceae_sp;
GS16_sp	0.00074	0.002647	k__Fungi;p__Aphelidiomycota;c__Aphelidiomycetes;o__GS16;f__unidentified_GS16_sp;g__unidentified_GS16_sp;s__GS16_sp;
Sarocladium_kiliense	0.00085	0.001721	k__Fungi;p__Ascomycota;c__Sordariomycetes;o__Hypocreales;f__Hypocreales_fam_Incertae_sedis;g__Sarocladium;s__Sarocladium_kiliense;
Kernia_sp	5.9e-05	0.000955	k__Fungi;p__Ascomycota;c__Sordariomycetes;o__Microascales;f__Microascaceae;g__Kernia;s__Kernia_sp;
Didymocyrtis_cladoniicola	0.000867	3e-05	k__Fungi;p__Ascomycota;c__Dothideomycetes;o__Pleosporales;f__Phaeosphaeriaceae;g__Didymocyrtis;s__Didymocyrtis_cladoniicola;
Spizellomycetales_sp	0.000858	8e-05	k__Fungi;p__Chytridiomycota;c__Spizellomycetes;o__Spizellomycetales;f__unidentified_Spizellomycetales_sp;g__unidentified_Spizellomycetales_sp;s__Spizellomycetales_sp;
Endogonales_sp	7.2e-05	0.001907	k__Fungi;p__Mucoromycota;c__Endogonomycetes;o__Endogonales;f__unidentified_Endogonales_sp;g__unidentified_Endogonales_sp;s__Endogonales_sp;
Piptocephalis_lepidula	0.00071	0.001662	k__Fungi;p__Zoopagomycota;c__Zoopagomycetes;o__Zoopagales;f__Piptocephalidaceae;g__Piptocephalis;s__Piptocephalis_lepidula;
Saccharomycetales_sp	0.00041	0.001501	k__Fungi;p__Ascomycota;c__Saccharomycetes;o__Saccharomycetales;f__unidentified_Saccharomycetales_sp;g__unidentified_Saccharomycetales_sp;s__Saccharomycetales_sp;
Mortierella_indohii	6.3e-05	0.000977	k__Fungi;p__Mortierellomycota;c__Mortierellomycetes;o__Mortierellales;f__Mortierellaceae;g__Mortierella;s__Mortierella_indohii;
Ochroconis_sp	0.000571	1.3e-05	k__Fungi;p__Ascomycota;c__Dothideomycetes;o__Venturiales;f__Sympoventuriaceae;g__Ochroconis;s__Ochroconis_sp;
Microascales_sp	0.001353	0.000638	k__Fungi;p__Ascomycota;c__Sordariomycetes;o__Microascales;f__unidentified_Microascales_sp;g__unidentified_Microascales_sp;s__Microascales_sp;
Aspergillus_versicolor	0.00107	0.000118	k__Fungi;p__Ascomycota;c__Eurotiomycetes;o__Eurotiales;f__Aspergillaceae;g__Aspergillus;s__Aspergillus_versicolor;
Russulales_sp	0.001239	0.001416	k__Fungi;p__Basidiomycota;c__Agaricomycetes;o__Russulales;f__unidentified_Russulales_sp;g__unidentified_Russulales_sp;s__Russulales_sp;
Chrysosporium_sp	0.00211	0.000841	k__Fungi;p__Ascomycota;c__Eurotiomycetes;o__Onygenales;f__Onygenales_fam_Incertae_sedis;g__Chrysosporium;s__Chrysosporium_sp;
Metarhizium_anisopliae	0.000605	7.6e-05	k__Fungi;p__Ascomycota;c__Sordariomycetes;o__Hypocreales;f__Clavicipitaceae;g__Metarhizium;s__Metarhizium_anisopliae;
Mortierella_clonocystis	0.000199	0.000854	k__Fungi;p__Mortierellomycota;c__Mortierellomycetes;o__Mortierellales;f__Mortierellaceae;g__Mortierella;s__Mortierella_clonocystis;
Gilmaniella_humicola	5.9e-05	0.001459	k__Fungi;p__Ascomycota;c__Sordariomycetes;o__Sordariales;f__Chaetomiaceae;g__Gilmaniella;s__Gilmaniella_humicola;
Chaetomium_sp	0.000368	0.000706	k__Fungi;p__Ascomycota;c__Sordariomycetes;o__Sordariales;f__Chaetomiaceae;g__Chaetomium;s__Chaetomium_sp;
Ascobolaceae_sp	9.3e-05	0.001366	k__Fungi;p__Ascomycota;c__Pezizomycetes;o__Pezizales;f__Ascobolaceae;g__unidentified;s__Ascobolaceae_sp;
Myrothecium_sp	0.001378	0.000888	k__Fungi;p__Ascomycota;c__Sordariomycetes;o__Hypocreales;f__Stachybotryaceae;g__Myrothecium;s__Myrothecium_sp;
Nodulosphaeria_sp	0.000909	4.7e-05	k__Fungi;p__Ascomycota;c__Dothideomycetes;o__Pleosporales;f__Phaeosphaeriaceae;g__Nodulosphaeria;s__Nodulosphaeria_sp;
Hypocreales_sp	0.001585	0.000342	k__Fungi;p__Ascomycota;c__Sordariomycetes;o__Hypocreales;f__unidentified_Hypocreales_sp;g__unidentified_Hypocreales_sp;s__Hypocreales_sp;
Aspergillus_caespitosus	0.001251	3.4e-05	k__Fungi;p__Ascomycota;c__Eurotiomycetes;o__Eurotiales;f__Aspergillaceae;g__Aspergillus;s__Aspergillus_caespitosus;
Fusicolla_aquaeductuum	0.000123	0.001137	k__Fungi;p__Ascomycota;c__Sordariomycetes;o__Hypocreales;f__Nectriaceae;g__Fusicolla;s__Fusicolla_aquaeductuum;
Imaia_gigantea	0.00041	3.8e-05	k__Fungi;p__Ascomycota;c__Pezizomycetes;o__Pezizales;f__Pezizaceae;g__Imaia;s__Imaia_gigantea;
Cephaliophora_sp	9.7e-05	0.000431	k__Fungi;p__Ascomycota;c__Pezizomycetes;o__Pezizales;f__Ascodesmidaceae;g__Cephaliophora;s__Cephaliophora_sp;
Fusarium_nematophilum	0.001311	0.001065	k__Fungi;p__Ascomycota;c__Sordariomycetes;o__Hypocreales;f__Nectriaceae;g__Fusarium;s__Fusarium_nematophilum;
Syncephalis_sp	0.000266	0.001247	k__Fungi;p__Zoopagomycota;c__Zoopagomycetes;o__Zoopagales;f__Piptocephalidaceae;g__Syncephalis;s__Syncephalis_sp;
Clonostachys_rosea	0.001235	0.000575	k__Fungi;p__Ascomycota;c__Sordariomycetes;o__Hypocreales;f__Bionectriaceae;g__Clonostachys;s__Clonostachys_rosea;
Penicillium_sp	0.001251	0.00044	k__Fungi;p__Ascomycota;c__Eurotiomycetes;o__Eurotiales;f__Aspergillaceae;g__Penicillium;s__Penicillium_sp;
Agaricales_sp	0.000533	0.000114	k__Fungi;p__Basidiomycota;c__Agaricomycetes;o__Agaricales;f__unidentified_Agaricales_sp;g__unidentified_Agaricales_sp;s__Agaricales_sp;
Acremonium_sclerotigenum	0.001425	0.000444	k__Fungi;p__Ascomycota;c__Sordariomycetes;o__Hypocreales;f__Hypocreales_fam_Incertae_sedis;g__Acremonium;s__Acremonium_sclerotigenum;
Pucciniomycetes_sp	0.000156	0.000402	k__Fungi;p__Basidiomycota;c__Pucciniomycetes;o__unidentified_Pucciniomycetes_sp;f__unidentified_Pucciniomycetes_sp;g__unidentified_Pucciniomycetes_sp;s__Pucciniomycetes_sp;
Neocucurbitaria_sp	0.001332	0.000926	k__Fungi;p__Ascomycota;c__Dothideomycetes;o__Pleosporales;f__Cucurbitariaceae;g__Neocucurbitaria;s__Neocucurbitaria_sp;
Cladosporium_halotolerans	0.000841	7.2e-05	k__Fungi;p__Ascomycota;c__Dothideomycetes;o__Capnodiales;f__Cladosporiaceae;g__Cladosporium;s__Cladosporium_halotolerans;
Polyphlyctis_unispina	0	0.000444	k__Fungi;p__Chytridiomycota;c__Chytridiomycetes;o__Chytridiales;f__Chytridiaceae;g__Polyphlyctis;s__Polyphlyctis_unispina;
Pseudogymnoascus_roseus	0.000178	0.000884	k__Fungi;p__Ascomycota;c__Leotiomycetes;o__Thelebolales;f__Pseudeurotiaceae;g__Pseudogymnoascus;s__Pseudogymnoascus_roseus;
Trichoderma_harzianum	0.00096	0.000583	k__Fungi;p__Ascomycota;c__Sordariomycetes;o__Hypocreales;f__Hypocreaceae;g__Trichoderma;s__Trichoderma_harzianum;
Aspergillus_flavus	0.001095	0.000169	k__Fungi;p__Ascomycota;c__Eurotiomycetes;o__Eurotiales;f__Aspergillaceae;g__Aspergillus;s__Aspergillus_flavus;
Ustilago_hordei	0.000613	0.000482	k__Fungi;p__Basidiomycota;c__Ustilaginomycetes;o__Ustilaginales;f__Ustilaginaceae;g__Ustilago;s__Ustilago_hordei;
Suillus_bovinus	0.000309	0	k__Fungi;p__Basidiomycota;c__Agaricomycetes;o__Boletales;f__Suillaceae;g__Suillus;s__Suillus_bovinus;
Acremonium_sp	0.000643	0.000393	k__Fungi;p__Ascomycota;c__Sordariomycetes;o__Hypocreales;f__Hypocreales_fam_Incertae_sedis;g__Acremonium;s__Acremonium_sp;
Aspergillus_aculeatus	0.000689	0.000241	k__Fungi;p__Ascomycota;c__Eurotiomycetes;o__Eurotiales;f__Aspergillaceae;g__Aspergillus;s__Aspergillus_aculeatus;
Stachybotrys_limonispora	0.000541	0.000977	k__Fungi;p__Ascomycota;c__Sordariomycetes;o__Hypocreales;f__Stachybotryaceae;g__Stachybotrys;s__Stachybotrys_limonispora;
Rozellomycota_sp	0.001006	0.000799	k__Fungi;p__Rozellomycota;c__unidentified_Rozellomycota_sp;o__unidentified_Rozellomycota_sp;f__unidentified_Rozellomycota_sp;g__unidentified_Rozellomycota_sp;s__Rozellomycota_sp;
Conocybe_fuscimarginata	3.4e-05	0.001036	k__Fungi;p__Basidiomycota;c__Agaricomycetes;o__Agaricales;f__Bolbitiaceae;g__Conocybe;s__Conocybe_fuscimarginata;
Eurotiomycetes_sp	8e-06	0.000419	k__Fungi;p__Ascomycota;c__Eurotiomycetes;o__unidentified_Eurotiomycetes_sp;f__unidentified_Eurotiomycetes_sp;g__unidentified_Eurotiomycetes_sp;s__Eurotiomycetes_sp;
Sistotrema_sp	0.000338	0	k__Fungi;p__Basidiomycota;c__Agaricomycetes;o__Cantharellales;f__Cantharellales_fam_Incertae_sedis;g__Sistotrema;s__Sistotrema_sp;
Kodamaea_sp	4.7e-05	0.001065	k__Fungi;p__Ascomycota;c__Saccharomycetes;o__Saccharomycetales;f__Metschnikowiaceae;g__Kodamaea;s__Kodamaea_sp;
Tubulicrinis_chaetophorus	6.3e-05	0.000638	k__Fungi;p__Basidiomycota;c__Agaricomycetes;o__Hymenochaetales;f__Tubulicrinaceae;g__Tubulicrinis;s__Tubulicrinis_chaetophorus;
Pezizaceae_sp	0.000292	0.00011	k__Fungi;p__Ascomycota;c__Pezizomycetes;o__Pezizales;f__Pezizaceae;g__unidentified;s__Pezizaceae_sp;
GS11_sp	0.000884	0.000571	k__Fungi;p__Rozellomycota;c__Rozellomycotina_cls_Incertae_sedis;o__GS11;f__unidentified_GS11_sp;g__unidentified_GS11_sp;s__GS11_sp;
Acremonium_furcatum	0.000588	0.00022	k__Fungi;p__Ascomycota;c__Sordariomycetes;o__Hypocreales;f__Hypocreales_fam_Incertae_sedis;g__Acremonium;s__Acremonium_furcatum;
Glomeraceae_sp	0.000397	0.000114	k__Fungi;p__Glomeromycota;c__Glomeromycetes;o__Glomerales;f__Glomeraceae;g__unidentified;s__Glomeraceae_sp;
Chaetomium_globosum	0.000351	0.000397	k__Fungi;p__Ascomycota;c__Sordariomycetes;o__Sordariales;f__Chaetomiaceae;g__Chaetomium;s__Chaetomium_globosum;
Paecilomyces_sp	0.000795	0.000275	k__Fungi;p__Ascomycota;c__Sordariomycetes;o__Hypocreales;f__Clavicipitaceae;g__Paecilomyces;s__Paecilomyces_sp;
Thelephoraceae_sp	0.000799	0.000156	k__Fungi;p__Basidiomycota;c__Agaricomycetes;o__Thelephorales;f__Thelephoraceae;g__unidentified;s__Thelephoraceae_sp;
Lichenomphalia_lobata	0.000326	0.0003	k__Fungi;p__Basidiomycota;c__Agaricomycetes;o__Agaricales;f__Tricholomataceae;g__Lichenomphalia;s__Lichenomphalia_lobata;
GS05_sp	0.000448	1.7e-05	k__Fungi;p__Rozellomycota;c__Rozellomycotina_cls_Incertae_sedis;o__GS05;f__unidentified_GS05_sp;g__unidentified_GS05_sp;s__GS05_sp;
Zoopagomycota_sp	0.000376	0.00074	k__Fungi;p__Zoopagomycota;c__unidentified_Zoopagomycota_sp;o__unidentified_Zoopagomycota_sp;f__unidentified_Zoopagomycota_sp;g__unidentified_Zoopagomycota_sp;s__Zoopagomycota_sp;
Acrophialophora_sp	5.1e-05	0.000296	k__Fungi;p__Ascomycota;c__Sordariomycetes;o__Sordariales;f__Chaetomiaceae;g__Acrophialophora;s__Acrophialophora_sp;
Dactylonectria_torresensis	0.000846	0.000309	k__Fungi;p__Ascomycota;c__Sordariomycetes;o__Hypocreales;f__Nectriaceae;g__Dactylonectria;s__Dactylonectria_torresensis;
Patinella_sp	0.000575	0.000313	k__Fungi;p__Ascomycota;c__Leotiomycetes;o__Helotiales;f__Dermateaceae;g__Patinella;s__Patinella_sp;
Mrakia_sp	0.000714	0.000681	k__Fungi;p__Basidiomycota;c__Tremellomycetes;o__Cystofilobasidiales;f__Mrakiaceae;g__Mrakia;s__Mrakia_sp;
Ceratocystidaceae_sp	2.5e-05	0.000571	k__Fungi;p__Ascomycota;c__Sordariomycetes;o__Microascales;f__Ceratocystidaceae;g__unidentified;s__Ceratocystidaceae_sp;
Sordariales_sp	0.000144	0.000592	k__Fungi;p__Ascomycota;c__Sordariomycetes;o__Sordariales;f__unidentified_Sordariales_sp;g__unidentified_Sordariales_sp;s__Sordariales_sp;
Geastrum_sp	0.000702	0.000528	k__Fungi;p__Basidiomycota;c__Agaricomycetes;o__Geastrales;f__Geastraceae;g__Geastrum;s__Geastrum_sp;
Gigasporales_sp	0.000355	0.000486	k__Fungi;p__Glomeromycota;c__Glomeromycetes;o__Gigasporales;f__unidentified_Gigasporales_sp;g__unidentified_Gigasporales_sp;s__Gigasporales_sp;
Neocosmospora_striata	9.7e-05	0.000757	k__Fungi;p__Ascomycota;c__Sordariomycetes;o__Hypocreales;f__Nectriaceae;g__Neocosmospora;s__Neocosmospora_striata;
Botryosporium_pulchrum	0.000609	5.9e-05	k__Fungi;p__Ascomycota;c__Sordariomycetes;o__Hypoceales;f__Catabotrydaceae;g__Botryosporium;s__Botryosporium_pulchrum;
Phallus_hadriani	0.000114	0.000334	k__Fungi;p__Basidiomycota;c__Agaricomycetes;o__Phallales;f__Phallaceae;g__Phallus;s__Phallus_hadriani;
Curvibasidium_sp	4e-06	0.000431	k__Fungi;p__Basidiomycota;c__Microbotryomycetes;o__Microbotryomycetes_ord_Incertae_sedis;f__Microbotryomycetes_fam_Incertae_sedis;g__Curvibasidium;s__Curvibasidium_sp;
Massariosphaeria_roumeguerei	0.000114	0.000292	k__Fungi;p__Ascomycota;c__Dothideomycetes;o__Pleosporales;f__Pleosporales_fam_Incertae_sedis;g__Massariosphaeria;s__Massariosphaeria_roumeguerei;
Nectriaceae_sp	0.000292	0.000313	k__Fungi;p__Ascomycota;c__Sordariomycetes;o__Hypocreales;f__Nectriaceae;g__unidentified;s__Nectriaceae_sp;
Aspergillus_niger	0.000262	0.00033	k__Fungi;p__Ascomycota;c__Eurotiomycetes;o__Eurotiales;f__Aspergillaceae;g__Aspergillus;s__Aspergillus_niger;
Titaea_maxilliformis	0.000423	0.000448	k__Fungi;p__Ascomycota;c__Dothideomycetes;o__Tubeufiales;f__Tubeufiaceae;g__Titaea;s__Titaea_maxilliformis;
Humicola_parvispora	8.5e-05	0.000304	k__Fungi;p__Ascomycota;c__Sordariomycetes;o__Sordariales;f__Chaetomiaceae;g__Humicola;s__Humicola_parvispora;
Trichoderma_aureoviride	0.000211	0.000626	k__Fungi;p__Ascomycota;c__Sordariomycetes;o__Hypocreales;f__Hypocreaceae;g__Trichoderma;s__Trichoderma_aureoviride;
Mortierella_oligospora	0.000317	0.000313	k__Fungi;p__Mortierellomycota;c__Mortierellomycetes;o__Mortierellales;f__Mortierellaceae;g__Mortierella;s__Mortierella_oligospora;
Corynascella_humicola	2.5e-05	0.000359	k__Fungi;p__Ascomycota;c__Sordariomycetes;o__Sordariales;f__Chaetomiaceae;g__Corynascella;s__Corynascella_humicola;
Tausonia_pullulans	0.000359	0.00014	k__Fungi;p__Basidiomycota;c__Tremellomycetes;o__Cystofilobasidiales;f__Mrakiaceae;g__Tausonia;s__Tausonia_pullulans;
Ascomycota_sp	0.00052	0.000672	k__Fungi;p__Ascomycota;c__unidentified_Ascomycota_sp;o__unidentified_Ascomycota_sp;f__unidentified_Ascomycota_sp;g__unidentified_Ascomycota_sp;s__Ascomycota_sp;
Iodophanus_testaceus	0.00019	2.5e-05	k__Fungi;p__Ascomycota;c__Pezizomycetes;o__Pezizales;f__Pezizaceae;g__Iodophanus;s__Iodophanus_testaceus;
Peziza_saniosa	0.000156	0	k__Fungi;p__Ascomycota;c__Pezizomycetes;o__Pezizales;f__Pezizaceae;g__Peziza;s__Peziza_saniosa;
Ustilaginaceae_sp	0.000114	0.000368	k__Fungi;p__Basidiomycota;c__Ustilaginomycetes;o__Ustilaginales;f__Ustilaginaceae;g__unidentified;s__Ustilaginaceae_sp;
Sordariomycetes_sp	0.000397	0.00066	k__Fungi;p__Ascomycota;c__Sordariomycetes;o__unidentified_Sordariomycetes_sp;f__unidentified_Sordariomycetes_sp;g__unidentified_Sordariomycetes_sp;s__Sordariomycetes_sp;
Solicoccozyma_terricola	5.1e-05	0.000385	k__Fungi;p__Basidiomycota;c__Tremellomycetes;o__Filobasidiales;f__Piskurozymaceae;g__Solicoccozyma;s__Solicoccozyma_terricola;
Gymnoascus_reessii	4.7e-05	0.00044	k__Fungi;p__Ascomycota;c__Eurotiomycetes;o__Onygenales;f__Gymnoascaceae;g__Gymnoascus;s__Gymnoascus_reessii;
Remersonia_thermophila	0.000194	3.8e-05	k__Fungi;p__Ascomycota;c__Sordariomycetes;o__Sordariales;f__Sordariales_fam_Incertae_sedis;g__Remersonia;s__Remersonia_thermophila;
Tulostoma_sp	0.000372	0.000152	k__Fungi;p__Basidiomycota;c__Agaricomycetes;o__Agaricales;f__Agaricaceae;g__Tulostoma;s__Tulostoma_sp;
Fusarium_proliferatum	0.000474	0.000478	k__Fungi;p__Ascomycota;c__Sordariomycetes;o__Hypocreales;f__Nectriaceae;g__Fusarium;s__Fusarium_proliferatum;
Gamsylella_phymatopaga	0.000279	0.000203	k__Fungi;p__Ascomycota;c__Orbiliomycetes;o__Orbiliales;f__Orbiliaceae;g__Gamsylella;s__Gamsylella_phymatopaga;
Talaromyces_verruculosus	0.000173	0.000224	k__Fungi;p__Ascomycota;c__Eurotiomycetes;o__Eurotiales;f__Trichocomaceae;g__Talaromyces;s__Talaromyces_verruculosus;
Melanospora_verrucispora	0.000258	0.000123	k__Fungi;p__Ascomycota;c__Sordariomycetes;o__Melanosporales;f__Melanosporaceae;g__Melanospora;s__Melanospora_verrucispora;
Roussoella_solani	3e-05	0.000507	k__Fungi;p__Ascomycota;c__Dothideomycetes;o__Pleosporales;f__Thyridariaceae;g__Roussoella;s__Roussoella_solani;
Auriculariales_sp	0.000148	6.3e-05	k__Fungi;p__Basidiomycota;c__Agaricomycetes;o__Auriculariales;f__unidentified_Auriculariales_sp;g__unidentified_Auriculariales_sp;s__Auriculariales_sp;
Sporidiobolus_sp	0	0.000135	k__Fungi;p__Basidiomycota;c__Microbotryomycetes;o__Sporidiobolales;f__Sporidiobolaceae;g__Sporidiobolus;s__Sporidiobolus_sp;
Magnaporthaceae_sp	0.000123	0.000313	k__Fungi;p__Ascomycota;c__Sordariomycetes;o__Magnaporthales;f__Magnaporthaceae;g__unidentified;s__Magnaporthaceae_sp;
Heterobasidion_annosum	0.000106	0.000419	k__Fungi;p__Basidiomycota;c__Agaricomycetes;o__Russulales;f__Bondarzewiaceae;g__Heterobasidion;s__Heterobasidion_annosum;
Thielavia_terricola	0	0.000194	k__Fungi;p__Ascomycota;c__Sordariomycetes;o__Sordariales;f__Chaetomiaceae;g__Thielavia;s__Thielavia_terricola;
Archaeorhizomycetes_sp	0.000144	8e-06	k__Fungi;p__Ascomycota;c__Archaeorhizomycetes;o__unidentified_Archaeorhizomycetes_sp;f__unidentified_Archaeorhizomycetes_sp;g__unidentified_Archaeorhizomycetes_sp;s__Archaeorhizomycetes_sp;
Erythrobasidium_hasegawianum	8e-06	0.000131	k__Fungi;p__Basidiomycota;c__Cystobasidiomycetes;o__Erythrobasidiales;f__Erythrobasidiaceae;g__Erythrobasidium;s__Erythrobasidium_hasegawianum;
Mortierella_reticulata	8e-06	0.000135	k__Fungi;p__Mortierellomycota;c__Mortierellomycetes;o__Mortierellales;f__Mortierellaceae;g__Mortierella;s__Mortierella_reticulata;
Pleotrichocladium_opacum	1.7e-05	0.000355	k__Fungi;p__Ascomycota;c__Dothideomycetes;o__Pleosporales;f__Melanommataceae;g__Pleotrichocladium;s__Pleotrichocladium_opacum;
Podospora_sp	6.3e-05	0.000165	k__Fungi;p__Ascomycota;c__Sordariomycetes;o__Sordariales;f__Lasiosphaeriaceae;g__Podospora;s__Podospora_sp;
Xenasma_pruinosum	0.0003	0.000287	k__Fungi;p__Basidiomycota;c__Agaricomycetes;o__Polyporales;f__Xenasmataceae;g__Xenasma;s__Xenasma_pruinosum;
Leptosphaeria_sclerotioides	0.00019	0.000364	k__Fungi;p__Ascomycota;c__Dothideomycetes;o__Pleosporales;f__Leptosphaeriaceae;g__Leptosphaeria;s__Leptosphaeria_sclerotioides;
Acremonium_persicinum	0.000283	0.000169	k__Fungi;p__Ascomycota;c__Sordariomycetes;o__Hypocreales;f__Hypocreales_fam_Incertae_sedis;g__Acremonium;s__Acremonium_persicinum;
Arthroderma_fulvum	0.000304	6.8e-05	k__Fungi;p__Ascomycota;c__Eurotiomycetes;o__Onygenales;f__Arthrodermataceae;g__Arthroderma;s__Arthroderma_fulvum;
Pseudobensingtonia_sp	3e-05	0.000224	k__Fungi;p__Basidiomycota;c__Agaricostilbomycetes;o__Agaricostilbales;f__Agaricostilbaceae;g__Pseudobensingtonia;s__Pseudobensingtonia_sp;
Lasiosphaeriaceae_sp	0.000144	0.000368	k__Fungi;p__Ascomycota;c__Sordariomycetes;o__Sordariales;f__Lasiosphaeriaceae;g__unidentified;s__Lasiosphaeriaceae_sp;
Lacazia_loboi	0.000233	0.000271	k__Fungi;p__Ascomycota;c__Eurotiomycetes;o__Onygenales;f__Onygenales_fam_Incertae_sedis;g__Lacazia;s__Lacazia_loboi;
Orbiliales_sp	8.9e-05	0.000368	k__Fungi;p__Ascomycota;c__Orbiliomycetes;o__Orbiliales;f__unidentified_Orbiliales_sp;g__unidentified_Orbiliales_sp;s__Orbiliales_sp;
Tremellomycetes_sp	0.00014	0.000359	k__Fungi;p__Basidiomycota;c__Tremellomycetes;o__unidentified_Tremellomycetes_sp;f__unidentified_Tremellomycetes_sp;g__unidentified_Tremellomycetes_sp;s__Tremellomycetes_sp;
Arthrobotrys_sinensis	3.8e-05	0.000203	k__Fungi;p__Ascomycota;c__Orbiliomycetes;o__Orbiliales;f__Orbiliaceae;g__Arthrobotrys;s__Arthrobotrys_sinensis;
Massaria_inquinans	0.000127	0	k__Fungi;p__Ascomycota;c__Dothideomycetes;o__Pleosporales;f__Massariaceae;g__Massaria;s__Massaria_inquinans;
Mucor_sp	0.000182	0.000131	k__Fungi;p__Mucoromycota;c__Mucoromycetes;o__Mucorales;f__Mucoraceae;g__Mucor;s__Mucor_sp;
Chaetomium_angulare	0.000152	0.000228	k__Fungi;p__Ascomycota;c__Sordariomycetes;o__Sordariales;f__Chaetomiaceae;g__Chaetomium;s__Chaetomium_angulare;
Chaetothyriales_sp	0.000389	0.000178	k__Fungi;p__Ascomycota;c__Eurotiomycetes;o__Chaetothyriales;f__unidentified_Chaetothyriales_sp;g__unidentified_Chaetothyriales_sp;s__Chaetothyriales_sp;
Basidiomycota_sp	0.000165	2.5e-05	k__Fungi;p__Basidiomycota;c__unidentified_Basidiomycota_sp;o__unidentified_Basidiomycota_sp;f__unidentified_Basidiomycota_sp;g__unidentified_Basidiomycota_sp;s__Basidiomycota_sp;
Coniochaeta_sp	0.000131	4e-06	k__Fungi;p__Ascomycota;c__Sordariomycetes;o__Coniochaetales;f__Coniochaetaceae;g__Coniochaeta;s__Coniochaeta_sp;
Zopfiella_sp	0	0.000123	k__Fungi;p__Ascomycota;c__Sordariomycetes;o__Sordariales;f__Chaetomiaceae;g__Zopfiella;s__Zopfiella_sp;
Sporobolomyces_sp	2.1e-05	0.000123	k__Fungi;p__Basidiomycota;c__Microbotryomycetes;o__Sporidiobolales;f__Sporidiobolaceae;g__Sporobolomyces;s__Sporobolomyces_sp;
Apiotrichum_scarabaeorum	0	0.000101	k__Fungi;p__Basidiomycota;c__Tremellomycetes;o__Trichosporonales;f__Trichosporonaceae;g__Apiotrichum;s__Apiotrichum_scarabaeorum;
Verpa_sp	3.8e-05	0.000135	k__Fungi;p__Ascomycota;c__Pezizomycetes;o__Pezizales;f__Morchellaceae;g__Verpa;s__Verpa_sp;
Penicillium_philippinense	5.9e-05	0.000211	k__Fungi;p__Ascomycota;c__Eurotiomycetes;o__Eurotiales;f__Aspergillaceae;g__Penicillium;s__Penicillium_philippinense;
Pseudogymnoascus_sp	0.000186	0.000275	k__Fungi;p__Ascomycota;c__Leotiomycetes;o__Thelebolales;f__Pseudeurotiaceae;g__Pseudogymnoascus;s__Pseudogymnoascus_sp;
Clonostachys_sp	0.000114	0.000118	k__Fungi;p__Ascomycota;c__Sordariomycetes;o__Hypocreales;f__Bionectriaceae;g__Clonostachys;s__Clonostachys_sp;
Synchytrium_sp	0.000178	4e-06	k__Fungi;p__Chytridiomycota;c__Synchytriomycetes;o__Synchytriales;f__Synchytriaceae;g__Synchytrium;s__Synchytrium_sp;
Hamigera_ingelheimensis	0	0.000106	k__Fungi;p__Ascomycota;c__Eurotiomycetes;o__Eurotiales;f__Aspergillaceae;g__Hamigera;s__Hamigera_ingelheimensis;
Monocillium_sp	0.000101	0.000241	k__Fungi;p__Ascomycota;c__Sordariomycetes;o__Hypocreales;f__Hypocreaceae;g__Monocillium;s__Monocillium_sp;
Meliniomyces_sp	9.3e-05	0	k__Fungi;p__Ascomycota;c__Leotiomycetes;o__Helotiales;f__Helotiaceae;g__Meliniomyces;s__Meliniomyces_sp;
Agaricomycetes_sp	0.000131	0.000211	k__Fungi;p__Basidiomycota;c__Agaricomycetes;o__unidentified_Agaricomycetes_sp;f__unidentified_Agaricomycetes_sp;g__unidentified_Agaricomycetes_sp;s__Agaricomycetes_sp;
Orbilia_sp	0.000309	0.000131	k__Fungi;p__Ascomycota;c__Orbiliomycetes;o__Orbiliales;f__Orbiliaceae;g__Orbilia;s__Orbilia_sp;
Lecanicillium_saksenae	0.000152	0.000152	k__Fungi;p__Ascomycota;c__Sordariomycetes;o__Hypocreales;f__Cordycipitaceae;g__Lecanicillium;s__Lecanicillium_saksenae;
Fusarium_oxysporum	0.000148	7.6e-05	k__Fungi;p__Ascomycota;c__Sordariomycetes;o__Hypocreales;f__Nectriaceae;g__Fusarium;s__Fusarium_oxysporum;
Naganishia_sp	1.3e-05	0.000266	k__Fungi;p__Basidiomycota;c__Tremellomycetes;o__Filobasidiales;f__Filobasidiaceae;g__Naganishia;s__Naganishia_sp;
Clavaria_acuta	0.000165	3e-05	k__Fungi;p__Basidiomycota;c__Agaricomycetes;o__Agaricales;f__Clavariaceae;g__Clavaria;s__Clavaria_acuta;
Thermomyces_lanuginosus	9.7e-05	0.000368	k__Fungi;p__Ascomycota;c__Eurotiomycetes;o__Eurotiales;f__Trichocomaceae;g__Thermomyces;s__Thermomyces_lanuginosus;
Cylindrocarpon_sp	0.000203	0.000207	k__Fungi;p__Ascomycota;c__Sordariomycetes;o__Hypocreales;f__Nectriaceae;g__Cylindrocarpon;s__Cylindrocarpon_sp;
Leptospora_rubella	0.000304	4e-06	k__Fungi;p__Ascomycota;c__Dothideomycetes;o__Pleosporales;f__Phaeosphaeriaceae;g__Leptospora;s__Leptospora_rubella;
Metacordyceps_chlamydosporia	2.5e-05	0.00011	k__Fungi;p__Ascomycota;c__Sordariomycetes;o__Hypocreales;f__Clavicipitaceae;g__Metacordyceps;s__Metacordyceps_chlamydosporia;
Pseudonectria_foliicola	1.3e-05	8.5e-05	k__Fungi;p__Ascomycota;c__Sordariomycetes;o__Hypocreales;f__Nectriaceae;g__Pseudonectria;s__Pseudonectria_foliicola;
Catenariaceae_sp	0	8.9e-05	k__Fungi;p__Blastocladiomycota;c__Blastocladiomycetes;o__Blastocladiales;f__Catenariaceae;g__unidentified;s__Catenariaceae_sp;
Olpidium_virulentus	9.3e-05	2.1e-05	k__Fungi;p__Olpidiomycota;c__Olpidiomycetes;o__Olpidiales;f__Olpidiaceae;g__Olpidium;s__Olpidium_virulentus;
Cladorrhinum_hyalocarpum	0	8e-05	k__Fungi;p__Ascomycota;c__Sordariomycetes;o__Sordariales;f__Lasiosphaeriaceae;g__Cladorrhinum;s__Cladorrhinum_hyalocarpum;
Conocybe_rickenii	5.5e-05	0.0003	k__Fungi;p__Basidiomycota;c__Agaricomycetes;o__Agaricales;f__Bolbitiaceae;g__Conocybe;s__Conocybe_rickenii;
Rhizopus_stolonifer	0.000228	8e-05	k__Fungi;p__Mucoromycota;c__Mucoromycetes;o__Mucorales;f__Rhizopodaceae;g__Rhizopus;s__Rhizopus_stolonifer;
Chaetomium_thermophilum	0.000123	0.000152	k__Fungi;p__Ascomycota;c__Sordariomycetes;o__Sordariales;f__Chaetomiaceae;g__Chaetomium;s__Chaetomium_thermophilum;
Sarocladium_dejongiae	7.6e-05	0	k__Fungi;p__Ascomycota;c__Sordariomycetes;o__Hypocreales;f__Hypocreales_fam_Incertae_sedis;g__Sarocladium;s__Sarocladium_dejongiae;
Pyronemataceae_sp	0	8.9e-05	k__Fungi;p__Ascomycota;c__Pezizomycetes;o__Pezizales;f__Pyronemataceae;g__unidentified;s__Pyronemataceae_sp;
Rhizopus_arrhizus	8e-06	0.000165	k__Fungi;p__Mucoromycota;c__Mucoromycetes;o__Mucorales;f__Rhizopodaceae;g__Rhizopus;s__Rhizopus_arrhizus;
Herpotrichiellaceae_sp	0.000186	0.000182	k__Fungi;p__Ascomycota;c__Eurotiomycetes;o__Chaetothyriales;f__Herpotrichiellaceae;g__unidentified;s__Herpotrichiellaceae_sp;
Trimorphomycetaceae_sp	1.7e-05	0.000161	k__Fungi;p__Basidiomycota;c__Tremellomycetes;o__Tremellales;f__Trimorphomycetaceae;g__unidentified;s__Trimorphomycetaceae_sp;
Phoma_sp	0.000127	3.4e-05	k__Fungi;p__Ascomycota;c__Dothideomycetes;o__Pleosporales;f__Didymellaceae;g__Phoma;s__Phoma_sp;
Xylaria_moelleroclavus	0.000127	2.1e-05	k__Fungi;p__Ascomycota;c__Sordariomycetes;o__Xylariales;f__Xylariaceae;g__Xylaria;s__Xylaria_moelleroclavus;
Heleococcum_aurantiacum	8e-06	7.2e-05	k__Fungi;p__Ascomycota;c__Sordariomycetes;o__Hypocreales;f__Bionectriaceae;g__Heleococcum;s__Heleococcum_aurantiacum;
Lophiostomataceae_sp	7.2e-05	0	k__Fungi;p__Ascomycota;c__Dothideomycetes;o__Pleosporales;f__Lophiostomataceae;g__unidentified;s__Lophiostomataceae_sp;
Eleutherascus_peruvianus	0.000114	2.1e-05	k__Fungi;p__Ascomycota;c__Pezizomycetes;o__Pezizales;f__Ascodesmidaceae;g__Eleutherascus;s__Eleutherascus_peruvianus;
Tetracladium_sp	0.000258	0.000156	k__Fungi;p__Ascomycota;c__Leotiomycetes;o__Helotiales;f__Helotiaceae;g__Tetracladium;s__Tetracladium_sp;
Dacrymyces_chrysospermus	7.2e-05	0	k__Fungi;p__Basidiomycota;c__Dacrymycetes;o__Dacrymycetales;f__Dacrymycetaceae;g__Dacrymyces;s__Dacrymyces_chrysospermus;
Penicillium_chrysogenum	0.000241	0.000148	k__Fungi;p__Ascomycota;c__Eurotiomycetes;o__Eurotiales;f__Aspergillaceae;g__Penicillium;s__Penicillium_chrysogenum;
Craterellus_atratus	3.8e-05	0.000194	k__Fungi;p__Basidiomycota;c__Agaricomycetes;o__Cantharellales;f__Cantharellaceae;g__Craterellus;s__Craterellus_atratus;
Stachybotrys_chlorohalonata	0.000211	0.000144	k__Fungi;p__Ascomycota;c__Sordariomycetes;o__Hypocreales;f__Stachybotryaceae;g__Stachybotrys;s__Stachybotrys_chlorohalonata;
Mortierellales_sp	0.00011	5.9e-05	k__Fungi;p__Mortierellomycota;c__Mortierellomycetes;o__Mortierellales;f__unidentified_Mortierellales_sp;g__unidentified_Mortierellales_sp;s__Mortierellales_sp;
Capronia_sp	0.000178	3.8e-05	k__Fungi;p__Ascomycota;c__Eurotiomycetes;o__Chaetothyriales;f__Herpotrichiellaceae;g__Capronia;s__Capronia_sp;
Exophiala_dermatitidis	4.2e-05	0.00019	k__Fungi;p__Ascomycota;c__Eurotiomycetes;o__Chaetothyriales;f__Herpotrichiellaceae;g__Exophiala;s__Exophiala_dermatitidis;
Metarhizium_sp	0.000178	0.000156	k__Fungi;p__Ascomycota;c__Sordariomycetes;o__Hypocreales;f__Clavicipitaceae;g__Metarhizium;s__Metarhizium_sp;
Pseudothielavia_terricola	8e-06	0.000114	k__Fungi;p__Ascomycota;c__Sordariomycetes;o__Sordariales;f__Chaetomiaceae;g__Pseudothielavia;s__Pseudothielavia_terricola;
Pseudallescheria_boydii	0.000148	8e-06	k__Fungi;p__Ascomycota;c__Sordariomycetes;o__Microascales;f__Microascaceae;g__Pseudallescheria;s__Pseudallescheria_boydii;
Chaetomium_homopilatum	8e-05	0.000241	k__Fungi;p__Ascomycota;c__Sordariomycetes;o__Sordariales;f__Chaetomiaceae;g__Chaetomium;s__Chaetomium_homopilatum;
Cladophialophora_sp	0.000182	0.000194	k__Fungi;p__Ascomycota;c__Eurotiomycetes;o__Chaetothyriales;f__Herpotrichiellaceae;g__Cladophialophora;s__Cladophialophora_sp;
Fusicolla_sp	0.00011	5.1e-05	k__Fungi;p__Ascomycota;c__Sordariomycetes;o__Hypocreales;f__Nectriaceae;g__Fusicolla;s__Fusicolla_sp;
Beauveria_sp	0.00019	0.000101	k__Fungi;p__Ascomycota;c__Sordariomycetes;o__Hypocreales;f__Cordycipitaceae;g__Beauveria;s__Beauveria_sp;
GS02_sp	0.00011	6.3e-05	k__Fungi;p__Rozellomycota;c__Rozellomycotina_cls_Incertae_sedis;o__GS02;f__unidentified_GS02_sp;g__unidentified_GS02_sp;s__GS02_sp;
Aspergillaceae_sp	0.000152	1.7e-05	k__Fungi;p__Ascomycota;c__Eurotiomycetes;o__Eurotiales;f__Aspergillaceae;g__unidentified;s__Aspergillaceae_sp;
Fusarium_delphinoides	0.00011	0.000101	k__Fungi;p__Ascomycota;c__Sordariomycetes;o__Hypocreales;f__Nectriaceae;g__Fusarium;s__Fusarium_delphinoides;
Beauveria_bassiana	6.8e-05	7.2e-05	k__Fungi;p__Ascomycota;c__Sordariomycetes;o__Hypocreales;f__Cordycipitaceae;g__Beauveria;s__Beauveria_bassiana;
Diversispora_sp	0	0.000118	k__Fungi;p__Glomeromycota;c__Glomeromycetes;o__Diversisporales;f__Diversisporaceae;g__Diversispora;s__Diversispora_sp;
Neodactylaria_sp	0.000161	0.00019	k__Fungi;p__Ascomycota;c__Dothideomycetes;o__Dothideomycetes_ord_Incertae_sedis;f__Dothideomycetes_fam_Incertae_sedis;g__Neodactylaria;s__Neodactylaria_sp;
Glomeromycotina	3e-05	0.000127	k__Fungi;p__Glomeromycota;c__unidentified_Glomeromycotina;o__unidentified_Glomeromycotina;f__unidentified_Glomeromycotina;g__unidentified_Glomeromycotina;s__Glomeromycotina;
Neocucurbitaria_vachelliae	0.000101	0.000127	k__Fungi;p__Ascomycota;c__Dothideomycetes;o__Pleosporales;f__Cucurbitariaceae;g__Neocucurbitaria;s__Neocucurbitaria_vachelliae;
Rotiferophthora_angustispora	0	5.1e-05	k__Fungi;p__Ascomycota;c__Sordariomycetes;o__Hypocreales;f__Hypocreales_fam_Incertae_sedis;g__Rotiferophthora;s__Rotiferophthora_angustispora;
Fusarium_solani	4.7e-05	0.000152	k__Fungi;p__Ascomycota;c__Sordariomycetes;o__Hypocreales;f__Nectriaceae;g__Fusarium;s__Fusarium_solani;
Sympoventuriaceae_sp	7.6e-05	0.000118	k__Fungi;p__Ascomycota;c__Dothideomycetes;o__Venturiales;f__Sympoventuriaceae;g__unidentified;s__Sympoventuriaceae_sp;
Leucosporidium_sp	0.000123	0.000114	k__Fungi;p__Basidiomycota;c__Microbotryomycetes;o__Leucosporidiales;f__Leucosporidiaceae;g__Leucosporidium;s__Leucosporidium_sp;
Endophragmiella_constricta	8e-06	8e-05	k__Fungi;p__Ascomycota;c__Sordariomycetes;o__Sordariales;f__Helminthosphaeriaceae;g__Endophragmiella;s__Endophragmiella_constricta;
Achroiostachys_betulicola	0.00011	8.9e-05	k__Fungi;p__Ascomycota;c__Sordariomycetes;o__Hypocreales;f__Stachybotryaceae;g__Achroiostachys;s__Achroiostachys_betulicola;
Colletotrichum_truncatum	0	5.1e-05	k__Fungi;p__Ascomycota;c__Sordariomycetes;o__Glomerellales;f__Glomerellaceae;g__Colletotrichum;s__Colletotrichum_truncatum;
Aspergillus_flavipes	1.7e-05	5.1e-05	k__Fungi;p__Ascomycota;c__Eurotiomycetes;o__Eurotiales;f__Aspergillaceae;g__Aspergillus;s__Aspergillus_flavipes;
Chaetomium_mareoticum	8e-06	0.000106	k__Fungi;p__Ascomycota;c__Sordariomycetes;o__Sordariales;f__Chaetomiaceae;g__Chaetomium;s__Chaetomium_mareoticum;
Amaurodon_mustialaensis	5.1e-05	0	k__Fungi;p__Basidiomycota;c__Agaricomycetes;o__Thelephorales;f__Thelephoraceae;g__Amaurodon;s__Amaurodon_mustialaensis;
Paraglomus_laccatum	1.3e-05	7.2e-05	k__Fungi;p__Glomeromycota;c__Paraglomeromycetes;o__Paraglomerales;f__Paraglomeraceae;g__Paraglomus;s__Paraglomus_laccatum;
Symmetrospora_sp	0	5.1e-05	k__Fungi;p__Basidiomycota;c__Cystobasidiomycetes;o__Cystobasidiomycetes_ord_Incertae_sedis;f__Symmetrosporaceae;g__Symmetrospora;s__Symmetrospora_sp;
Geminibasidium_sp	7.2e-05	4.7e-05	k__Fungi;p__Basidiomycota;c__Geminibasidiomycetes;o__Geminibasidiales;f__Geminibasidiaceae;g__Geminibasidium;s__Geminibasidium_sp;
Trichocomaceae_sp	0	5.1e-05	k__Fungi;p__Ascomycota;c__Eurotiomycetes;o__Eurotiales;f__Trichocomaceae;g__unidentified;s__Trichocomaceae_sp;
Sirastachys_castanedae	0.000118	9.7e-05	k__Fungi;p__Ascomycota;c__Sordariomycetes;o__Hypocreales;f__Stachybotryaceae;g__Sirastachys;s__Sirastachys_castanedae;
Cunninghamella_sp	6.8e-05	4e-06	k__Fungi;p__Mucoromycota;c__Mucoromycetes;o__Mucorales;f__Cunninghamellaceae;g__Cunninghamella;s__Cunninghamella_sp;
Chalara_sp	0.000148	1.3e-05	k__Fungi;p__Ascomycota;c__Leotiomycetes;o__Helotiales;f__Helotiales_fam_Incertae_sedis;g__Chalara;s__Chalara_sp;
Myrothecium_gramineum	9.7e-05	3.8e-05	k__Fungi;p__Ascomycota;c__Sordariomycetes;o__Hypocreales;f__Stachybotryaceae;g__Myrothecium;s__Myrothecium_gramineum;
Acephala_sp	4e-06	5.9e-05	k__Fungi;p__Ascomycota;c__Leotiomycetes;o__Helotiales;f__Helotiales_fam_Incertae_sedis;g__Acephala;s__Acephala_sp;
Gaertneriomyces_semiglobifer	0	0.000156	k__Fungi;p__Chytridiomycota;c__Spizellomycetes;o__Spizellomycetales;f__Spizellomycetaceae;g__Gaertneriomyces;s__Gaertneriomyces_semiglobifer;
Entoloma_sp	0.00014	1.7e-05	k__Fungi;p__Basidiomycota;c__Agaricomycetes;o__Agaricales;f__Entolomataceae;g__Entoloma;s__Entoloma_sp;
Sarocladium_sp	4.7e-05	0	k__Fungi;p__Ascomycota;c__Sordariomycetes;o__Hypocreales;f__Hypocreales_fam_Incertae_sedis;g__Sarocladium;s__Sarocladium_sp;
Septofusidium_herbarum	4.7e-05	0	k__Fungi;p__Ascomycota;c__Sordariomycetes;o__Hypocreales;f__Tilachlidiaceae;g__Septofusidium;s__Septofusidium_herbarum;
Pseudeurotium_ovale	0.000123	3.4e-05	k__Fungi;p__Ascomycota;c__Leotiomycetes;o__Thelebolales;f__Pseudeurotiaceae;g__Pseudeurotium;s__Pseudeurotium_ovale;
Spizellomyces_dolichospermus	9.7e-05	7.2e-05	k__Fungi;p__Chytridiomycota;c__Spizellomycetes;o__Spizellomycetales;f__Spizellomycetaceae;g__Spizellomyces;s__Spizellomyces_dolichospermus;
Nigrospora_sp	4e-06	4.7e-05	k__Fungi;p__Ascomycota;c__Sordariomycetes;o__Trichosphaeriales;f__Trichosphaeriaceae;g__Nigrospora;s__Nigrospora_sp;
GS06_sp	1.3e-05	0.000144	k__Fungi;p__Rozellomycota;c__Rozellomycotina_cls_Incertae_sedis;o__GS06;f__unidentified_GS06_sp;g__unidentified_GS06_sp;s__GS06_sp;
Trichoderma_hamatum	9.7e-05	0.000123	k__Fungi;p__Ascomycota;c__Sordariomycetes;o__Hypocreales;f__Hypocreaceae;g__Trichoderma;s__Trichoderma_hamatum;
Monographella_nivalis	6.8e-05	0.000178	k__Fungi;p__Ascomycota;c__Sordariomycetes;o__Xylariales;f__Hyponectriaceae;g__Monographella;s__Monographella_nivalis;
Acrophialophora_levis	0	9.3e-05	k__Fungi;p__Ascomycota;c__Sordariomycetes;o__Sordariales;f__Chaetomiaceae;g__Acrophialophora;s__Acrophialophora_levis;
Geodina_sp	5.1e-05	3.4e-05	k__Fungi;p__Ascomycota;c__Pezizomycetes;o__Pezizales;f__Sarcoscyphaceae;g__Geodina;s__Geodina_sp;
Cercophora_samala	4.2e-05	2.1e-05	k__Fungi;p__Ascomycota;c__Sordariomycetes;o__Sordariales;f__Lasiosphaeriaceae;g__Cercophora;s__Cercophora_samala;
Sagenomella_oligospora	3.8e-05	9.3e-05	k__Fungi;p__Ascomycota;c__Eurotiomycetes;o__Eurotiales;f__Trichocomaceae;g__Sagenomella;s__Sagenomella_oligospora;
Mortierella_globalpina	8e-05	0.000135	k__Fungi;p__Mortierellomycota;c__Mortierellomycetes;o__Mortierellales;f__Mortierellaceae;g__Mortierella;s__Mortierella_globalpina;
Leptosphaeria_sp	8.5e-05	0.000106	k__Fungi;p__Ascomycota;c__Dothideomycetes;o__Pleosporales;f__Leptosphaeriaceae;g__Leptosphaeria;s__Leptosphaeria_sp;
Plectosphaerella_sinensis	8.5e-05	9.3e-05	k__Fungi;p__Ascomycota;c__Sordariomycetes;o__Glomerellales;f__Plectosphaerellaceae;g__Plectosphaerella;s__Plectosphaerella_sinensis;
Botryosphaeria_dothidea	1.7e-05	4.2e-05	k__Fungi;p__Ascomycota;c__Dothideomycetes;o__Botryosphaeriales;f__Botryosphaeriaceae;g__Botryosphaeria;s__Botryosphaeria_dothidea;
Catenaria_sp	0	4.7e-05	k__Fungi;p__Blastocladiomycota;c__Blastocladiomycetes;o__Blastocladiales;f__Catenariaceae;g__Catenaria;s__Catenaria_sp;
Chloridium_sp	9.7e-05	0.000118	k__Fungi;p__Ascomycota;c__Sordariomycetes;o__Chaetosphaeriales;f__Chaetosphaeriaceae;g__Chloridium;s__Chloridium_sp;
Lobulomycetales_sp	1.3e-05	5.1e-05	k__Fungi;p__Chytridiomycota;c__Lobulomycetes;o__Lobulomycetales;f__unidentified_Lobulomycetales_sp;g__unidentified_Lobulomycetales_sp;s__Lobulomycetales_sp;
Pyrenochaeta_sp	6.8e-05	7.6e-05	k__Fungi;p__Ascomycota;c__Dothideomycetes;o__Pleosporales;f__Cucurbitariaceae;g__Pyrenochaeta;s__Pyrenochaeta_sp;
GS01_sp	5.5e-05	3.8e-05	k__Fungi;p__GS01;c__unidentified_GS01_sp;o__unidentified_GS01_sp;f__unidentified_GS01_sp;g__unidentified_GS01_sp;s__GS01_sp;
Candelaria_sp	0.000106	5.9e-05	k__Fungi;p__Ascomycota;c__Lecanoromycetes;o__Candelariales;f__Candelariaceae;g__Candelaria;s__Candelaria_sp;
Suillus_spraguei	4e-06	5.5e-05	k__Fungi;p__Basidiomycota;c__Agaricomycetes;o__Boletales;f__Suillaceae;g__Suillus;s__Suillus_spraguei;
Beauveria_felina	0.000106	3.4e-05	k__Fungi;p__Ascomycota;c__Sordariomycetes;o__Hypocreales;f__Cordycipitaceae;g__Beauveria;s__Beauveria_felina;
Mortierella_hyalina	3e-05	5.1e-05	k__Fungi;p__Mortierellomycota;c__Mortierellomycetes;o__Mortierellales;f__Mortierellaceae;g__Mortierella;s__Mortierella_hyalina;
Hypoderma_rubi	3.8e-05	3.8e-05	k__Fungi;p__Ascomycota;c__Leotiomycetes;o__Rhytismatales;f__Rhytismataceae;g__Hypoderma;s__Hypoderma_rubi;
Pseudeurotium_bakeri	0.000106	2.1e-05	k__Fungi;p__Ascomycota;c__Leotiomycetes;o__Thelebolales;f__Pseudeurotiaceae;g__Pseudeurotium;s__Pseudeurotium_bakeri;
Powellomyces_sp	1.7e-05	5.5e-05	k__Fungi;p__Chytridiomycota;c__Spizellomycetes;o__Spizellomycetales;f__Powellomycetaceae;g__Powellomyces;s__Powellomyces_sp;
Agaricaceae_sp	4e-06	5.5e-05	k__Fungi;p__Basidiomycota;c__Agaricomycetes;o__Agaricales;f__Agaricaceae;g__unidentified;s__Agaricaceae_sp;
Talaromyces_sp	5.9e-05	4.7e-05	k__Fungi;p__Ascomycota;c__Eurotiomycetes;o__Eurotiales;f__Trichocomaceae;g__Talaromyces;s__Talaromyces_sp;
Darksidea_sp	5.5e-05	0.000114	k__Fungi;p__Ascomycota;c__Dothideomycetes;o__Pleosporales;f__Lentitheciaceae;g__Darksidea;s__Darksidea_sp;
Cladorrhinum_bulbillosum	1.3e-05	3.8e-05	k__Fungi;p__Ascomycota;c__Sordariomycetes;o__Sordariales;f__Lasiosphaeriaceae;g__Cladorrhinum;s__Cladorrhinum_bulbillosum;
Curvularia_sp	3.4e-05	8e-06	k__Fungi;p__Ascomycota;c__Dothideomycetes;o__Pleosporales;f__Pleosporaceae;g__Curvularia;s__Curvularia_sp;
Aspergillus_chlamydosporus	7.6e-05	3e-05	k__Fungi;p__Ascomycota;c__Eurotiomycetes;o__Eurotiales;f__Aspergillaceae;g__Aspergillus;s__Aspergillus_chlamydosporus;
Acaulopage_sp	4e-06	5.1e-05	k__Fungi;p__Zoopagomycota;c__Zoopagomycetes;o__Zoopagales;f__Zoopagaceae;g__Acaulopage;s__Acaulopage_sp;
Duddingtonia_flagrans	3.4e-05	8e-06	k__Fungi;p__Ascomycota;c__Orbiliomycetes;o__Orbiliales;f__Orbiliaceae;g__Duddingtonia;s__Duddingtonia_flagrans;
Microthecium_sp	3e-05	5.1e-05	k__Fungi;p__Ascomycota;c__Sordariomycetes;o__Melanosporales;f__Ceratostomataceae;g__Microthecium;s__Microthecium_sp;
Polylobatispora_sp	0	3.4e-05	k__Fungi;p__Ascomycota;c__Pezizomycotina_cls_Incertae_sedis;o__Pezizomycotina_ord_Incertae_sedis;f__Pezizomycotina_fam_Incertae_sedis;g__Polylobatispora;s__Polylobatispora_sp;
Filobasidium_magnum	3.4e-05	4.7e-05	k__Fungi;p__Basidiomycota;c__Tremellomycetes;o__Filobasidiales;f__Filobasidiaceae;g__Filobasidium;s__Filobasidium_magnum;
Talaromyces_primulinus	0	6.3e-05	k__Fungi;p__Ascomycota;c__Eurotiomycetes;o__Eurotiales;f__Trichocomaceae;g__Talaromyces;s__Talaromyces_primulinus;
Apiotrichum_sp	0	3.8e-05	k__Fungi;p__Basidiomycota;c__Tremellomycetes;o__Trichosporonales;f__Trichosporonaceae;g__Apiotrichum;s__Apiotrichum_sp;
Ustilago_sp	3.4e-05	3.8e-05	k__Fungi;p__Basidiomycota;c__Ustilaginomycetes;o__Ustilaginales;f__Ustilaginaceae;g__Ustilago;s__Ustilago_sp;
Stilbella_sp	5.5e-05	2.1e-05	k__Fungi;p__Ascomycota;c__Sordariomycetes;o__Hypocreales;f__Hypocreales_fam_Incertae_sedis;g__Stilbella;s__Stilbella_sp;
Tomentella_sp	7.6e-05	5.5e-05	k__Fungi;p__Basidiomycota;c__Agaricomycetes;o__Thelephorales;f__Thelephoraceae;g__Tomentella;s__Tomentella_sp;
Phialemonium_inflatum	9.3e-05	5.1e-05	k__Fungi;p__Ascomycota;c__Sordariomycetes;o__Sordariales;f__Cephalothecaceae;g__Phialemonium;s__Phialemonium_inflatum;
Chytridiomycetes_sp	1.7e-05	5.5e-05	k__Fungi;p__Chytridiomycota;c__Chytridiomycetes;o__unidentified_Chytridiomycetes_sp;f__unidentified_Chytridiomycetes_sp;g__unidentified_Chytridiomycetes_sp;s__Chytridiomycetes_sp;
Acremonium_rutilum	8.5e-05	3.4e-05	k__Fungi;p__Ascomycota;c__Sordariomycetes;o__Hypocreales;f__Hypocreales_fam_Incertae_sedis;g__Acremonium;s__Acremonium_rutilum;
Sordaria_fimicola	5.9e-05	8e-05	k__Fungi;p__Ascomycota;c__Sordariomycetes;o__Sordariales;f__Sordariaceae;g__Sordaria;s__Sordaria_fimicola;
Glomus_sp	3e-05	7.2e-05	k__Fungi;p__Glomeromycota;c__Glomeromycetes;o__Glomerales;f__Glomeraceae;g__Glomus;s__Glomus_sp;
Rhizopus_microsporus	8e-05	0.000123	k__Fungi;p__Mucoromycota;c__Mucoromycetes;o__Mucorales;f__Rhizopodaceae;g__Rhizopus;s__Rhizopus_microsporus;
Pyxidiophora_arvernensis	0	8.5e-05	k__Fungi;p__Ascomycota;c__Laboulbeniomycetes;o__Pyxidiophorales;f__Pyxidiophoraceae;g__Pyxidiophora;s__Pyxidiophora_arvernensis;
Saccharomycopsis_fibuligera	9.7e-05	3.8e-05	k__Fungi;p__Ascomycota;c__Saccharomycetes;o__Saccharomycetales;f__Saccharomycopsidaceae;g__Saccharomycopsis;s__Saccharomycopsis_fibuligera;
Remispora_stellata	6.3e-05	5.1e-05	k__Fungi;p__Ascomycota;c__Sordariomycetes;o__Microascales;f__Halosphaeriaceae;g__Remispora;s__Remispora_stellata;
Lecidella_euphorea	0.000101	4.2e-05	k__Fungi;p__Ascomycota;c__Lecanoromycetes;o__Lecanorales;f__Lecanoraceae;g__Lecidella;s__Lecidella_euphorea;
Inocybe_serrata	2.1e-05	8.5e-05	k__Fungi;p__Basidiomycota;c__Agaricomycetes;o__Agaricales;f__Inocybaceae;g__Inocybe;s__Inocybe_serrata;
Leucoagaricus_sp	8.5e-05	5.1e-05	k__Fungi;p__Basidiomycota;c__Agaricomycetes;o__Agaricales;f__Agaricaceae;g__Leucoagaricus;s__Leucoagaricus_sp;
Microbotryum_pustulatum	5.5e-05	4e-06	k__Fungi;p__Basidiomycota;c__Microbotryomycetes;o__Microbotryales;f__Microbotryaceae;g__Microbotryum;s__Microbotryum_pustulatum;
Exosporium_sp	5.1e-05	7.6e-05	k__Fungi;p__Ascomycota;c__Dothideomycetes;o__Pleosporales;f__Massarinaceae;g__Exosporium;s__Exosporium_sp;
Cephalotrichum_sp	7.2e-05	3e-05	k__Fungi;p__Ascomycota;c__Sordariomycetes;o__Microascales;f__Microascaceae;g__Cephalotrichum;s__Cephalotrichum_sp;
Mortierellomycota_sp	3.4e-05	6.8e-05	k__Fungi;p__Mortierellomycota;c__unidentified_Mortierellomycota_sp;o__unidentified_Mortierellomycota_sp;f__unidentified_Mortierellomycota_sp;g__unidentified_Mortierellomycota_sp;s__Mortierellomycota_sp;
Penicillium_canescens	8e-06	5.1e-05	k__Fungi;p__Ascomycota;c__Eurotiomycetes;o__Eurotiales;f__Aspergillaceae;g__Penicillium;s__Penicillium_canescens;
Aporospora_sp	3e-05	0	k__Fungi;p__Ascomycota;c__Dothideomycetes;o__Pleosporales;f__Didymosphaeriaceae;g__Aporospora;s__Aporospora_sp;
Leptodiscella_sp	1.3e-05	3.8e-05	k__Fungi;p__Ascomycota;c__Dothideomycetes;o__Acrospermales;f__Acrospermales_fam_Incertae_sedis;g__Leptodiscella;s__Leptodiscella_sp;
Helvella_sp	4e-06	5.1e-05	k__Fungi;p__Ascomycota;c__Pezizomycetes;o__Pezizales;f__Helvellaceae;g__Helvella;s__Helvella_sp;
Moleospora_sp	3e-05	1.7e-05	k__Fungi;p__Ascomycota;c__Sordariomycetes;o__Lulworthiales;f__Lulworthiaceae;g__Moleospora;s__Moleospora_sp;
Epicoccum_sp	3.8e-05	5.9e-05	k__Fungi;p__Ascomycota;c__Dothideomycetes;o__Pleosporales;f__Didymellaceae;g__Epicoccum;s__Epicoccum_sp;
Aplosporella_prunicola	3e-05	0	k__Fungi;p__Ascomycota;c__Dothideomycetes;o__Botryosphaeriales;f__Aplosporellaceae;g__Aplosporella;s__Aplosporella_prunicola;
Mortierella_exigua	3.8e-05	0	k__Fungi;p__Mortierellomycota;c__Mortierellomycetes;o__Mortierellales;f__Mortierellaceae;g__Mortierella;s__Mortierella_exigua;
Massarina_sp	7.6e-05	1.7e-05	k__Fungi;p__Ascomycota;c__Dothideomycetes;o__Pleosporales;f__Massarinaceae;g__Massarina;s__Massarina_sp;
Westerdykella_centenaria	7.2e-05	3.4e-05	k__Fungi;p__Ascomycota;c__Dothideomycetes;o__Pleosporales;f__Sporormiaceae;g__Westerdykella;s__Westerdykella_centenaria;
Paraglomerales_sp	3.4e-05	1.7e-05	k__Fungi;p__Glomeromycota;c__Paraglomeromycetes;o__Paraglomerales;f__unidentified_Paraglomerales_sp;g__unidentified_Paraglomerales_sp;s__Paraglomerales_sp;
Volutella_ciliata	8.5e-05	1.3e-05	k__Fungi;p__Ascomycota;c__Sordariomycetes;o__Hypocreales;f__Nectriaceae;g__Volutella;s__Volutella_ciliata;
Articulospora_sp	3e-05	0	k__Fungi;p__Ascomycota;c__Leotiomycetes;o__Helotiales;f__Helotiaceae;g__Articulospora;s__Articulospora_sp;
Dipsacomyces_acuminosporus	0	3e-05	k__Fungi;p__Kickxellomycota;c__Kickxellomycetes;o__Kickxellales;f__Kickxellaceae;g__Dipsacomyces;s__Dipsacomyces_acuminosporus;
Plectosphaerellaceae_sp	5.1e-05	3e-05	k__Fungi;p__Ascomycota;c__Sordariomycetes;o__Glomerellales;f__Plectosphaerellaceae;g__unidentified;s__Plectosphaerellaceae_sp;
Floropilus_chiversii	0	7.6e-05	k__Fungi;p__Ascomycota;c__Sordariomycetes;o__Sordariales;f__Chaetomiaceae;g__Floropilus;s__Floropilus_chiversii;
Dipodascus_geotrichum	4.2e-05	1.3e-05	k__Fungi;p__Ascomycota;c__Saccharomycetes;o__Saccharomycetales;f__Dipodascaceae;g__Dipodascus;s__Dipodascus_geotrichum;
Parmelia_ernstiae	1.7e-05	7.2e-05	k__Fungi;p__Ascomycota;c__Lecanoromycetes;o__Lecanorales;f__Parmeliaceae;g__Parmelia;s__Parmelia_ernstiae;
Acremonium_charticola	5.9e-05	8e-06	k__Fungi;p__Ascomycota;c__Sordariomycetes;o__Hypocreales;f__Hypocreales_fam_Incertae_sedis;g__Acremonium;s__Acremonium_charticola;
Preussia_sp	4.2e-05	4e-06	k__Fungi;p__Ascomycota;c__Dothideomycetes;o__Pleosporales;f__Sporormiaceae;g__Preussia;s__Preussia_sp;
Mortierella_capitata	1.3e-05	3e-05	k__Fungi;p__Mortierellomycota;c__Mortierellomycetes;o__Mortierellales;f__Mortierellaceae;g__Mortierella;s__Mortierella_capitata;
GS04_sp	4e-06	7.2e-05	k__Fungi;p__Rozellomycota;c__Rozellomycotina_cls_Incertae_sedis;o__GS04;f__unidentified_GS04_sp;g__unidentified_GS04_sp;s__GS04_sp;
Paraphoma_chrysanthemicola	5.9e-05	3e-05	k__Fungi;p__Ascomycota;c__Dothideomycetes;o__Pleosporales;f__Phaeosphaeriaceae;g__Paraphoma;s__Paraphoma_chrysanthemicola;
Sterigmatomyces_sp	0	2.5e-05	k__Fungi;p__Basidiomycota;c__Agaricostilbomycetes;o__Agaricostilbales;f__Agaricostilbaceae;g__Sterigmatomyces;s__Sterigmatomyces_sp;
Diploschistes_scruposus	3e-05	4e-06	k__Fungi;p__Ascomycota;c__Lecanoromycetes;o__Ostropales;f__Graphidaceae;g__Diploschistes;s__Diploschistes_scruposus;
Bipolaris_maydis	3e-05	4e-06	k__Fungi;p__Ascomycota;c__Dothideomycetes;o__Pleosporales;f__Pleosporaceae;g__Bipolaris;s__Bipolaris_maydis;
Cheilymenia_sp	4e-06	2.5e-05	k__Fungi;p__Ascomycota;c__Pezizomycetes;o__Pezizales;f__Pyronemataceae;g__Cheilymenia;s__Cheilymenia_sp;
Hannaella_sinensis	0	2.5e-05	k__Fungi;p__Basidiomycota;c__Tremellomycetes;o__Tremellales;f__Bulleribasidiaceae;g__Hannaella;s__Hannaella_sinensis;
Blastocladiomycota_sp	8e-06	3e-05	k__Fungi;p__Blastocladiomycota;c__unidentified_Blastocladiomycota_sp;o__unidentified_Blastocladiomycota_sp;f__unidentified_Blastocladiomycota_sp;g__unidentified_Blastocladiomycota_sp;s__Blastocladiomycota_sp;
Aspergillus_rugulosus	4.2e-05	1.7e-05	k__Fungi;p__Ascomycota;c__Eurotiomycetes;o__Eurotiales;f__Aspergillaceae;g__Aspergillus;s__Aspergillus_rugulosus;
Trichoderma_aerugineum	5.1e-05	0	k__Fungi;p__Ascomycota;c__Sordariomycetes;o__Hypocreales;f__Hypocreaceae;g__Trichoderma;s__Trichoderma_aerugineum;
Chrysosporium_sulfureum	5.9e-05	3e-05	k__Fungi;p__Ascomycota;c__Eurotiomycetes;o__Onygenales;f__Onygenales_fam_Incertae_sedis;g__Chrysosporium;s__Chrysosporium_sulfureum;
Amanita_sp	4.7e-05	1.3e-05	k__Fungi;p__Basidiomycota;c__Agaricomycetes;o__Agaricales;f__Amanitaceae;g__Amanita;s__Amanita_sp;
Onygenales_sp	0.000101	3.4e-05	k__Fungi;p__Ascomycota;c__Eurotiomycetes;o__Onygenales;f__unidentified_Onygenales_sp;g__unidentified_Onygenales_sp;s__Onygenales_sp;
Subulicystidium_perlongisporum	0	3.8e-05	k__Fungi;p__Basidiomycota;c__Agaricomycetes;o__Trechisporales;f__Hydnodontaceae;g__Subulicystidium;s__Subulicystidium_perlongisporum;
Tulasnellaceae_sp	3.4e-05	0	k__Fungi;p__Basidiomycota;c__Agaricomycetes;o__Cantharellales;f__Tulasnellaceae;g__unidentified;s__Tulasnellaceae_sp;
Dothideomycetes_sp	4.7e-05	2.5e-05	k__Fungi;p__Ascomycota;c__Dothideomycetes;o__unidentified_Dothideomycetes_sp;f__unidentified_Dothideomycetes_sp;g__unidentified_Dothideomycetes_sp;s__Dothideomycetes_sp;
Naganishia_uzbekistanensis	5.5e-05	2.1e-05	k__Fungi;p__Basidiomycota;c__Tremellomycetes;o__Filobasidiales;f__Filobasidiaceae;g__Naganishia;s__Naganishia_uzbekistanensis;
Operculomyces_laminatus	2.5e-05	0	k__Fungi;p__Chytridiomycota;c__Rhizophydiomycetes;o__Rhizophydiales;f__Rhizophydiales_fam_Incertae_sedis;g__Operculomyces;s__Operculomyces_laminatus;
Lepraria_rigidula	0	3.8e-05	k__Fungi;p__Ascomycota;c__Lecanoromycetes;o__Lecanorales;f__Stereocaulaceae;g__Lepraria;s__Lepraria_rigidula;
Kernia_pachypleura	5.9e-05	2.1e-05	k__Fungi;p__Ascomycota;c__Sordariomycetes;o__Microascales;f__Microascaceae;g__Kernia;s__Kernia_pachypleura;
Thermoascus_crustaceus	2.5e-05	8e-06	k__Fungi;p__Ascomycota;c__Eurotiomycetes;o__Eurotiales;f__Thermoascaceae;g__Thermoascus;s__Thermoascus_crustaceus;
Papiliotrema_sp	1.3e-05	9.7e-05	k__Fungi;p__Basidiomycota;c__Tremellomycetes;o__Tremellales;f__Rhynchogastremataceae;g__Papiliotrema;s__Papiliotrema_sp;
Ovatospora_pseudomollicella	2.5e-05	0	k__Fungi;p__Ascomycota;c__Sordariomycetes;o__Sordariales;f__Chaetomiaceae;g__Ovatospora;s__Ovatospora_pseudomollicella;
Acrocalymma_aquatica	5.1e-05	4.2e-05	k__Fungi;p__Ascomycota;c__Dothideomycetes;o__Pleosporales;f__Morosphaeriaceae;g__Acrocalymma;s__Acrocalymma_aquatica;
Paracremonium_inflatum	4.7e-05	1.3e-05	k__Fungi;p__Ascomycota;c__Sordariomycetes;o__Hypocreales;f__Nectriaceae;g__Paracremonium;s__Paracremonium_inflatum;
Alternaria_tenuissima	1.7e-05	3e-05	k__Fungi;p__Ascomycota;c__Dothideomycetes;o__Pleosporales;f__Pleosporaceae;g__Alternaria;s__Alternaria_tenuissima;
Russula_sp	5.1e-05	1.7e-05	k__Fungi;p__Basidiomycota;c__Agaricomycetes;o__Russulales;f__Russulaceae;g__Russula;s__Russula_sp;
Periconia_byssoides	0	2.1e-05	k__Fungi;p__Ascomycota;c__Dothideomycetes;o__Pleosporales;f__Periconiaceae;g__Periconia;s__Periconia_byssoides;
GS08_sp	8e-06	3e-05	k__Fungi;p__Rozellomycota;c__Rozellomycotina_cls_Incertae_sedis;o__GS08;f__unidentified_GS08_sp;g__unidentified_GS08_sp;s__GS08_sp;
Stephanonectria_keithii	5.1e-05	4e-06	k__Fungi;p__Ascomycota;c__Sordariomycetes;o__Hypocreales;f__Nectriaceae;g__Stephanonectria;s__Stephanonectria_keithii;
Aureobasidium_pullulans	3.8e-05	3.8e-05	k__Fungi;p__Ascomycota;c__Dothideomycetes;o__Dothideales;f__Aureobasidiaceae;g__Aureobasidium;s__Aureobasidium_pullulans;
Acremonium_nepalense	4e-06	4.2e-05	k__Fungi;p__Ascomycota;c__Sordariomycetes;o__Hypocreales;f__Hypocreales_fam_Incertae_sedis;g__Acremonium;s__Acremonium_nepalense;
Phialemonium_sp	2.1e-05	2.1e-05	k__Fungi;p__Ascomycota;c__Sordariomycetes;o__Sordariales;f__Cephalothecaceae;g__Phialemonium;s__Phialemonium_sp;
Microsphaeropsis_sp	3.4e-05	2.5e-05	k__Fungi;p__Ascomycota;c__Dothideomycetes;o__Pleosporales;f__Pleosporales_fam_Incertae_sedis;g__Microsphaeropsis;s__Microsphaeropsis_sp;
Amesia_nigricolor	3e-05	3.4e-05	k__Fungi;p__Ascomycota;c__Sordariomycetes;o__Sordariales;f__Chaetomiaceae;g__Amesia;s__Amesia_nigricolor;
Pateramycetaceae_sp	2.1e-05	0	k__Fungi;p__Chytridiomycota;c__Rhizophydiomycetes;o__Rhizophydiales;f__Pateramycetaceae;g__unidentified;s__Pateramycetaceae_sp;
Tephrocybella_griseonigrescens	0	3.4e-05	k__Fungi;p__Basidiomycota;c__Agaricomycetes;o__Agaricales;f__Lyophyllaceae;g__Tephrocybella;s__Tephrocybella_griseonigrescens;
Sowerbyella_angustispora	0	2.5e-05	k__Fungi;p__Ascomycota;c__Pezizomycetes;o__Pezizales;f__Pyronemataceae;g__Sowerbyella;s__Sowerbyella_angustispora;
Harzia_sp	4e-06	3e-05	k__Fungi;p__Ascomycota;c__Sordariomycetes;o__Melanosporales;f__Ceratostomataceae;g__Harzia;s__Harzia_sp;
Acaulium_acremonium	2.1e-05	1.3e-05	k__Fungi;p__Ascomycota;c__Sordariomycetes;o__Microascales;f__Microascaceae;g__Acaulium;s__Acaulium_acremonium;
Antrodiella_zonata	4e-06	2.1e-05	k__Fungi;p__Basidiomycota;c__Agaricomycetes;o__Polyporales;f__Steccherinaceae;g__Antrodiella;s__Antrodiella_zonata;
Penicillium_citreosulfuratum	5.9e-05	3.8e-05	k__Fungi;p__Ascomycota;c__Eurotiomycetes;o__Eurotiales;f__Aspergillaceae;g__Penicillium;s__Penicillium_citreosulfuratum;
Neofusicoccum_corticosae	2.5e-05	0	k__Fungi;p__Ascomycota;c__Dothideomycetes;o__Botryosphaeriales;f__Botryosphaeriaceae;g__Neofusicoccum;s__Neofusicoccum_corticosae;
Lasiosphaeria_similisorbina	4e-06	3.4e-05	k__Fungi;p__Ascomycota;c__Sordariomycetes;o__Sordariales;f__Lasiosphaeriaceae;g__Lasiosphaeria;s__Lasiosphaeria_similisorbina;
Spizellomyces_sp	0	2.1e-05	k__Fungi;p__Chytridiomycota;c__Spizellomycetes;o__Spizellomycetales;f__Spizellomycetaceae;g__Spizellomyces;s__Spizellomyces_sp;
Gymnopus_hariolorum	2.1e-05	0	k__Fungi;p__Basidiomycota;c__Agaricomycetes;o__Agaricales;f__Omphalotaceae;g__Gymnopus;s__Gymnopus_hariolorum;
Rhizophydiales_sp	3e-05	8e-06	k__Fungi;p__Chytridiomycota;c__Rhizophydiomycetes;o__Rhizophydiales;f__unidentified_Rhizophydiales_sp;g__unidentified_Rhizophydiales_sp;s__Rhizophydiales_sp;
Hygrophorus_sp	2.1e-05	0	k__Fungi;p__Basidiomycota;c__Agaricomycetes;o__Agaricales;f__Hygrophoraceae;g__Hygrophorus;s__Hygrophorus_sp;
Penicillium_oxalicum	3.8e-05	2.5e-05	k__Fungi;p__Ascomycota;c__Eurotiomycetes;o__Eurotiales;f__Aspergillaceae;g__Penicillium;s__Penicillium_oxalicum;
Cephalotrichum_stemonitis	5.5e-05	4.7e-05	k__Fungi;p__Ascomycota;c__Sordariomycetes;o__Microascales;f__Microascaceae;g__Cephalotrichum;s__Cephalotrichum_stemonitis;
Thelebolaceae_sp	2.5e-05	2.1e-05	k__Fungi;p__Ascomycota;c__Leotiomycetes;o__Thelebolales;f__Thelebolaceae;g__unidentified;s__Thelebolaceae_sp;
Beauveria_brongniartii	2.1e-05	8e-06	k__Fungi;p__Ascomycota;c__Sordariomycetes;o__Hypocreales;f__Cordycipitaceae;g__Beauveria;s__Beauveria_brongniartii;
Pyrenochaetopsis_indica	8e-06	3e-05	k__Fungi;p__Ascomycota;c__Dothideomycetes;o__Pleosporales;f__Cucurbitariaceae;g__Pyrenochaetopsis;s__Pyrenochaetopsis_indica;
Schizothecium_sp	2.5e-05	8e-06	k__Fungi;p__Ascomycota;c__Sordariomycetes;o__Sordariales;f__Lasiosphaeriaceae;g__Schizothecium;s__Schizothecium_sp;
Heydenia_alpina	4.7e-05	4e-06	k__Fungi;p__Ascomycota;c__Pezizomycetes;o__Pezizales;f__Pyronemataceae;g__Heydenia;s__Heydenia_alpina;
Scedosporium_aurantiacum	8e-06	2.5e-05	k__Fungi;p__Ascomycota;c__Sordariomycetes;o__Microascales;f__Microascaceae;g__Scedosporium;s__Scedosporium_aurantiacum;
Kluyveromyces_marxianus	4e-06	2.1e-05	k__Fungi;p__Ascomycota;c__Saccharomycetes;o__Saccharomycetales;f__Saccharomycetaceae;g__Kluyveromyces;s__Kluyveromyces_marxianus;
Rhodocollybia_maculata	2.1e-05	5.1e-05	k__Fungi;p__Basidiomycota;c__Agaricomycetes;o__Agaricales;f__Omphalotaceae;g__Rhodocollybia;s__Rhodocollybia_maculata;
Rollandina_capitata	2.1e-05	0	k__Fungi;p__Ascomycota;c__Eurotiomycetes;o__Onygenales;f__Gymnoascaceae;g__Rollandina;s__Rollandina_capitata;
Tyromyces_atrostrigosus	2.5e-05	0	k__Fungi;p__Basidiomycota;c__Agaricomycetes;o__Polyporales;f__Fomitopsidaceae;g__Tyromyces;s__Tyromyces_atrostrigosus;
Teichospora_viticola	8e-06	2.1e-05	k__Fungi;p__Ascomycota;c__Dothideomycetes;o__Pleosporales;f__Teichosporaceae;g__Teichospora;s__Teichospora_viticola;
Geminibasidiales_sp	8e-06	2.1e-05	k__Fungi;p__Basidiomycota;c__Geminibasidiomycetes;o__Geminibasidiales;f__unidentified_Geminibasidiales_sp;g__unidentified_Geminibasidiales_sp;s__Geminibasidiales_sp;
Fusicolla_merismoides	3.4e-05	0	k__Fungi;p__Ascomycota;c__Sordariomycetes;o__Hypocreales;f__Nectriaceae;g__Fusicolla;s__Fusicolla_merismoides;
Aspergillus_penicillioides	3.8e-05	4e-06	k__Fungi;p__Ascomycota;c__Eurotiomycetes;o__Eurotiales;f__Aspergillaceae;g__Aspergillus;s__Aspergillus_penicillioides;
Conocybe_microspora	4.2e-05	0	k__Fungi;p__Basidiomycota;c__Agaricomycetes;o__Agaricales;f__Bolbitiaceae;g__Conocybe;s__Conocybe_microspora;
Saitozyma_paraflava	3e-05	5.5e-05	k__Fungi;p__Basidiomycota;c__Tremellomycetes;o__Tremellales;f__Trimorphomycetaceae;g__Saitozyma;s__Saitozyma_paraflava;
Thermoascaceae_sp	7.2e-05	4.7e-05	k__Fungi;p__Ascomycota;c__Eurotiomycetes;o__Eurotiales;f__Thermoascaceae;g__unidentified;s__Thermoascaceae_sp;
Auxarthron_alboluteum	6.3e-05	2.1e-05	k__Fungi;p__Ascomycota;c__Eurotiomycetes;o__Onygenales;f__Onygenaceae;g__Auxarthron;s__Auxarthron_alboluteum;
Meyerozyma_caribbica	2.5e-05	0	k__Fungi;p__Ascomycota;c__Saccharomycetes;o__Saccharomycetales;f__Debaryomycetaceae;g__Meyerozyma;s__Meyerozyma_caribbica;
Stylopage_sp	8e-06	2.1e-05	k__Fungi;p__Zoopagomycota;c__Zoopagomycetes;o__Zoopagales;f__Zoopagaceae;g__Stylopage;s__Stylopage_sp;
Harpellomyces_montanus	5.1e-05	1.7e-05	k__Fungi;p__Kickxellomycota;c__Harpellomycetes;o__Harpellales;f__Harpellaceae;g__Harpellomyces;s__Harpellomyces_montanus;
Geastrum_triplex	0	2.5e-05	k__Fungi;p__Basidiomycota;c__Agaricomycetes;o__Geastrales;f__Geastraceae;g__Geastrum;s__Geastrum_triplex;
Torula_sp	2.5e-05	1.3e-05	k__Fungi;p__Ascomycota;c__Dothideomycetes;o__Pleosporales;f__Torulaceae;g__Torula;s__Torula_sp;
Mortierella_biramosa	1.7e-05	0	k__Fungi;p__Mortierellomycota;c__Mortierellomycetes;o__Mortierellales;f__Mortierellaceae;g__Mortierella;s__Mortierella_biramosa;
Aspergillus_ochraceus	5.1e-05	2.1e-05	k__Fungi;p__Ascomycota;c__Eurotiomycetes;o__Eurotiales;f__Aspergillaceae;g__Aspergillus;s__Aspergillus_ochraceus;
Paraconiothyrium_brasiliense	1.7e-05	0	k__Fungi;p__Ascomycota;c__Dothideomycetes;o__Pleosporales;f__Didymosphaeriaceae;g__Paraconiothyrium;s__Paraconiothyrium_brasiliense;
Psathyrella_sp	3e-05	1.7e-05	k__Fungi;p__Basidiomycota;c__Agaricomycetes;o__Agaricales;f__Psathyrellaceae;g__Psathyrella;s__Psathyrella_sp;
Cystobasidiomycetes_sp	0	1.7e-05	k__Fungi;p__Basidiomycota;c__Cystobasidiomycetes;o__unidentified_Cystobasidiomycetes_sp;f__unidentified_Cystobasidiomycetes_sp;g__unidentified_Cystobasidiomycetes_sp;s__Cystobasidiomycetes_sp;
Microstromatales_sp	4e-06	3.4e-05	k__Fungi;p__Basidiomycota;c__Exobasidiomycetes;o__Microstromatales;f__unidentified_Microstromatales_sp;g__unidentified_Microstromatales_sp;s__Microstromatales_sp;
Tremellodendropsidales_sp	3e-05	4e-06	k__Fungi;p__Basidiomycota;c__Agaricomycetes;o__Tremellodendropsidales;f__unidentified_Tremellodendropsidales_sp;g__unidentified_Tremellodendropsidales_sp;s__Tremellodendropsidales_sp;
Aphanoascus_verrucosus	4e-06	2.5e-05	k__Fungi;p__Ascomycota;c__Eurotiomycetes;o__Onygenales;f__Onygenaceae;g__Aphanoascus;s__Aphanoascus_verrucosus;
Fenestella_gardiennetii	2.5e-05	4.2e-05	k__Fungi;p__Ascomycota;c__Dothideomycetes;o__Pleosporales;f__Fenestellaceae;g__Fenestella;s__Fenestella_gardiennetii;
Trichoderma_sp	3e-05	8e-05	k__Fungi;p__Ascomycota;c__Sordariomycetes;o__Hypocreales;f__Hypocreaceae;g__Trichoderma;s__Trichoderma_sp;
Lecophagus_longisporus	8e-06	3.4e-05	k__Fungi;p__Ascomycota;c__Orbiliomycetes;o__Orbiliales;f__Orbiliales_fam_Incertae_sedis;g__Lecophagus;s__Lecophagus_longisporus;
Metschnikowia_pulcherrima	1.7e-05	0	k__Fungi;p__Ascomycota;c__Saccharomycetes;o__Saccharomycetales;f__Metschnikowiaceae;g__Metschnikowia;s__Metschnikowia_pulcherrima;
Terfezia_canariensis	0	1.7e-05	k__Fungi;p__Ascomycota;c__Pezizomycetes;o__Pezizales;f__Pezizaceae;g__Terfezia;s__Terfezia_canariensis;
Papiliotrema_flavescens	2.5e-05	1.3e-05	k__Fungi;p__Basidiomycota;c__Tremellomycetes;o__Tremellales;f__Rhynchogastremataceae;g__Papiliotrema;s__Papiliotrema_flavescens;
Neohelicomyces_deschampsiae	1.3e-05	2.1e-05	k__Fungi;p__Ascomycota;c__Dothideomycetes;o__Tubeufiales;f__Tubeufiaceae;g__Neohelicomyces;s__Neohelicomyces_deschampsiae;
Ruinenia_sp	2.5e-05	2.1e-05	k__Fungi;p__Basidiomycota;c__Agaricostilbomycetes;o__Agaricostilbales;f__Ruineniaceae;g__Ruinenia;s__Ruinenia_sp;
Amanita_vaginata	1.7e-05	4e-06	k__Fungi;p__Basidiomycota;c__Agaricomycetes;o__Agaricales;f__Amanitaceae;g__Amanita;s__Amanita_vaginata;
Petractis_hypoleuca	1.7e-05	0	k__Fungi;p__Ascomycota;c__Lecanoromycetes;o__Ostropales;f__Gyalectaceae;g__Petractis;s__Petractis_hypoleuca;
Metarhizium_flavoviride	2.1e-05	0	k__Fungi;p__Ascomycota;c__Sordariomycetes;o__Hypocreales;f__Clavicipitaceae;g__Metarhizium;s__Metarhizium_flavoviride;
Myxospora_sp	6.3e-05	2.1e-05	k__Fungi;p__Ascomycota;c__Sordariomycetes;o__Hypocreales;f__Stachybotryaceae;g__Myxospora;s__Myxospora_sp;
Bensingtonia_naganoensis	3.8e-05	2.5e-05	k__Fungi;p__Basidiomycota;c__Agaricostilbomycetes;o__Agaricostilbales;f__Kondoaceae;g__Bensingtonia;s__Bensingtonia_naganoensis;
Hapsidospora_irregularis	0	2.1e-05	k__Fungi;p__Ascomycota;c__Sordariomycetes;o__Hypocreales;f__Hypocreales_fam_Incertae_sedis;g__Hapsidospora;s__Hapsidospora_irregularis;
Hirsutella_thompsonii	1.7e-05	4e-06	k__Fungi;p__Ascomycota;c__Sordariomycetes;o__Hypocreales;f__Ophiocordycipitaceae;g__Hirsutella;s__Hirsutella_thompsonii;
Eurotiales_sp	1.3e-05	3.8e-05	k__Fungi;p__Ascomycota;c__Eurotiomycetes;o__Eurotiales;f__unidentified_Eurotiales_sp;g__unidentified_Eurotiales_sp;s__Eurotiales_sp;
Thermomyces_dupontii	0	2.1e-05	k__Fungi;p__Ascomycota;c__Eurotiomycetes;o__Eurotiales;f__Trichocomaceae;g__Thermomyces;s__Thermomyces_dupontii;
Graphilbum_pleomorphum	1.7e-05	1.3e-05	k__Fungi;p__Ascomycota;c__Sordariomycetes;o__Ophiostomatales;f__Ophiostomataceae;g__Graphilbum;s__Graphilbum_pleomorphum;
Acremonium_fusidioides	2.1e-05	8e-06	k__Fungi;p__Ascomycota;c__Sordariomycetes;o__Hypocreales;f__Hypocreales_fam_Incertae_sedis;g__Acremonium;s__Acremonium_fusidioides;
Cercophora_coprophila	1.7e-05	0	k__Fungi;p__Ascomycota;c__Sordariomycetes;o__Sordariales;f__Lasiosphaeriaceae;g__Cercophora;s__Cercophora_coprophila;
Morchella_rufobrunnea	3e-05	4e-06	k__Fungi;p__Ascomycota;c__Pezizomycetes;o__Pezizales;f__Morchellaceae;g__Morchella;s__Morchella_rufobrunnea;
Bulleribasidium_sp	8e-06	1.7e-05	k__Fungi;p__Basidiomycota;c__Tremellomycetes;o__Tremellales;f__Bulleribasidiaceae;g__Bulleribasidium;s__Bulleribasidium_sp;
Talaromyces_minioluteus	5.1e-05	4e-06	k__Fungi;p__Ascomycota;c__Eurotiomycetes;o__Eurotiales;f__Trichocomaceae;g__Talaromyces;s__Talaromyces_minioluteus;
Coprinellus_radians	1.3e-05	1.7e-05	k__Fungi;p__Basidiomycota;c__Agaricomycetes;o__Agaricales;f__Psathyrellaceae;g__Coprinellus;s__Coprinellus_radians;
Trechisporales_sp	4e-06	4.2e-05	k__Fungi;p__Basidiomycota;c__Agaricomycetes;o__Trechisporales;f__unidentified_Trechisporales_sp;g__unidentified_Trechisporales_sp;s__Trechisporales_sp;
Helvella_compressa	8e-06	2.5e-05	k__Fungi;p__Ascomycota;c__Pezizomycetes;o__Pezizales;f__Helvellaceae;g__Helvella;s__Helvella_compressa;
Mucor_circinelloides	3.8e-05	3e-05	k__Fungi;p__Mucoromycota;c__Mucoromycetes;o__Mucorales;f__Mucoraceae;g__Mucor;s__Mucor_circinelloides;
Ascosphaera_fusiformis	3.4e-05	0	k__Fungi;p__Ascomycota;c__Eurotiomycetes;o__Onygenales;f__Ascosphaeraceae;g__Ascosphaera;s__Ascosphaera_fusiformis;
Schizothecium_curvisporum	1.7e-05	0	k__Fungi;p__Ascomycota;c__Sordariomycetes;o__Sordariales;f__Lasiosphaeriaceae;g__Schizothecium;s__Schizothecium_curvisporum;
Ramalina_stevensiae	2.1e-05	4e-06	k__Fungi;p__Ascomycota;c__Lecanoromycetes;o__Lecanorales;f__Ramalinaceae;g__Ramalina;s__Ramalina_stevensiae;
Paraphaeosphaeria_sporulosa	2.5e-05	3.8e-05	k__Fungi;p__Ascomycota;c__Dothideomycetes;o__Pleosporales;f__Didymosphaeriaceae;g__Paraphaeosphaeria;s__Paraphaeosphaeria_sporulosa;
Idriella_sp	2.1e-05	1.3e-05	k__Fungi;p__Ascomycota;c__Sordariomycetes;o__Xylariales;f__Microdochiaceae;g__Idriella;s__Idriella_sp;
Diaporthe_helianthi	1.7e-05	8e-06	k__Fungi;p__Ascomycota;c__Sordariomycetes;o__Diaporthales;f__Diaporthaceae;g__Diaporthe;s__Diaporthe_helianthi;
Conocybe_apala	2.5e-05	1.7e-05	k__Fungi;p__Basidiomycota;c__Agaricomycetes;o__Agaricales;f__Bolbitiaceae;g__Conocybe;s__Conocybe_apala;
Hyphodontia_mollis	0	1.7e-05	k__Fungi;p__Basidiomycota;c__Agaricomycetes;o__Hymenochaetales;f__Schizoporaceae;g__Hyphodontia;s__Hyphodontia_mollis;
Leptosphaeria_maculans	0	3.8e-05	k__Fungi;p__Ascomycota;c__Dothideomycetes;o__Pleosporales;f__Leptosphaeriaceae;g__Leptosphaeria;s__Leptosphaeria_maculans;
Ascotaiwania_sawadae	1.3e-05	2.1e-05	k__Fungi;p__Ascomycota;c__Sordariomycetes;o__Savoryellales;f__Savoryellaceae;g__Ascotaiwania;s__Ascotaiwania_sawadae;
Penicillium_sumatraense	0	1.7e-05	k__Fungi;p__Ascomycota;c__Eurotiomycetes;o__Eurotiales;f__Aspergillaceae;g__Penicillium;s__Penicillium_sumatraense;
Gliomastix_murorum	1.3e-05	1.7e-05	k__Fungi;p__Ascomycota;c__Sordariomycetes;o__Hypocreales;f__Bionectriaceae;g__Gliomastix;s__Gliomastix_murorum;
Monascus_ruber	0	1.7e-05	k__Fungi;p__Ascomycota;c__Eurotiomycetes;o__Eurotiales;f__Aspergillaceae;g__Monascus;s__Monascus_ruber;
Parengyodontium_album	5.1e-05	3.8e-05	k__Fungi;p__Ascomycota;c__Sordariomycetes;o__Hypocreales;f__Cordycipitaceae;g__Parengyodontium;s__Parengyodontium_album;
Histoplasma_capsulatum	0	4.2e-05	k__Fungi;p__Ascomycota;c__Eurotiomycetes;o__Onygenales;f__Ajellomycetaceae;g__Histoplasma;s__Histoplasma_capsulatum;
Periconia_sp	2.5e-05	1.3e-05	k__Fungi;p__Ascomycota;c__Dothideomycetes;o__Pleosporales;f__Periconiaceae;g__Periconia;s__Periconia_sp;
Pseudocoleophoma_typhicola	0	2.5e-05	k__Fungi;p__Ascomycota;c__Dothideomycetes;o__Pleosporales;f__Dictyosporiaceae;g__Pseudocoleophoma;s__Pseudocoleophoma_typhicola;
Monodictys_indica	3.4e-05	3.8e-05	k__Fungi;p__Ascomycota;c__Dothideomycetes;o__Pleosporales;f__Pleosporales_fam_Incertae_sedis;g__Monodictys;s__Monodictys_indica;
Paraconiothyrium_archidendri	2.1e-05	3e-05	k__Fungi;p__Ascomycota;c__Dothideomycetes;o__Pleosporales;f__Didymosphaeriaceae;g__Paraconiothyrium;s__Paraconiothyrium_archidendri;
Aaosphaeria_arxii	8e-06	2.5e-05	k__Fungi;p__Ascomycota;c__Dothideomycetes;o__Pleosporales;f__Pleosporales_fam_Incertae_sedis;g__Aaosphaeria;s__Aaosphaeria_arxii;
Ascodesmis_sphaerospora	1.7e-05	3.8e-05	k__Fungi;p__Ascomycota;c__Pezizomycetes;o__Pezizales;f__Ascodesmidaceae;g__Ascodesmis;s__Ascodesmis_sphaerospora;
Glomeromycota_sp	3.4e-05	4e-06	k__Fungi;p__Glomeromycota;c__unidentified_Glomeromycota_sp;o__unidentified_Glomeromycota_sp;f__unidentified_Glomeromycota_sp;g__unidentified_Glomeromycota_sp;s__Glomeromycota_sp;
Scytalidium_multiseptatum	0	1.7e-05	k__Fungi;p__Ascomycota;c__Leotiomycetes;o__Helotiales;f__Helotiaceae;g__Scytalidium;s__Scytalidium_multiseptatum;
Curvularia_lunata	3.4e-05	1.7e-05	k__Fungi;p__Ascomycota;c__Dothideomycetes;o__Pleosporales;f__Pleosporaceae;g__Curvularia;s__Curvularia_lunata;
Corynespora_sp	0	1.7e-05	k__Fungi;p__Ascomycota;c__Dothideomycetes;o__Pleosporales;f__Corynesporascaceae;g__Corynespora;s__Corynespora_sp;
Dipodascaceae_sp	1.7e-05	0	k__Fungi;p__Ascomycota;c__Saccharomycetes;o__Saccharomycetales;f__Dipodascaceae;g__unidentified;s__Dipodascaceae_sp;
Acaulium_caviariforme	4e-06	2.1e-05	k__Fungi;p__Ascomycota;c__Sordariomycetes;o__Microascales;f__Microascaceae;g__Acaulium;s__Acaulium_caviariforme;
Ilyonectria_destructans	8e-06	2.1e-05	k__Fungi;p__Ascomycota;c__Sordariomycetes;o__Hypocreales;f__Nectriaceae;g__Ilyonectria;s__Ilyonectria_destructans;
Syncephalastrum_racemosum	0	3.4e-05	k__Fungi;p__Mucoromycota;c__Mucoromycetes;o__Mucorales;f__Syncephalastraceae;g__Syncephalastrum;s__Syncephalastrum_racemosum;
Stachybotrys_microspora	0	3e-05	k__Fungi;p__Ascomycota;c__Sordariomycetes;o__Hypocreales;f__Stachybotryaceae;g__Stachybotrys;s__Stachybotrys_microspora;
Amanita_concentrica	5.1e-05	3.8e-05	k__Fungi;p__Basidiomycota;c__Agaricomycetes;o__Agaricales;f__Amanitaceae;g__Amanita;s__Amanita_concentrica;
Curvularia_inaequalis	8e-06	2.1e-05	k__Fungi;p__Ascomycota;c__Dothideomycetes;o__Pleosporales;f__Pleosporaceae;g__Curvularia;s__Curvularia_inaequalis;
Aspergillus_ruber	1.7e-05	0	k__Fungi;p__Ascomycota;c__Eurotiomycetes;o__Eurotiales;f__Aspergillaceae;g__Aspergillus;s__Aspergillus_ruber;
Harzia_cameroonensis	2.5e-05	0	k__Fungi;p__Ascomycota;c__Sordariomycetes;o__Melanosporales;f__Ceratostomataceae;g__Harzia;s__Harzia_cameroonensis;
Tremellales_sp	8e-06	3e-05	k__Fungi;p__Basidiomycota;c__Tremellomycetes;o__Tremellales;f__unidentified_Tremellales_sp;g__unidentified_Tremellales_sp;s__Tremellales_sp;
Bullera_alba	0	1.7e-05	k__Fungi;p__Basidiomycota;c__Tremellomycetes;o__Tremellales;f__Bulleraceae;g__Bullera;s__Bullera_alba;
Penicillium_aurantiogriseum	5.9e-05	8e-06	k__Fungi;p__Ascomycota;c__Eurotiomycetes;o__Eurotiales;f__Aspergillaceae;g__Penicillium;s__Penicillium_aurantiogriseum;
Neocallimastix_sp	4e-06	1.7e-05	k__Fungi;p__Neocallimastigomycota;c__Neocallimastigomycetes;o__Neocallimastigales;f__Neocallimastigaceae;g__Neocallimastix;s__Neocallimastix_sp;
Lysurus_sp	2.5e-05	3.4e-05	k__Fungi;p__Basidiomycota;c__Agaricomycetes;o__Phallales;f__Phallaceae;g__Lysurus;s__Lysurus_sp;
Stagonosporopsis_lupini	3e-05	3.4e-05	k__Fungi;p__Ascomycota;c__Dothideomycetes;o__Pleosporales;f__Didymellaceae;g__Stagonosporopsis;s__Stagonosporopsis_lupini;
Curvularia_verruculosa	2.1e-05	0	k__Fungi;p__Ascomycota;c__Dothideomycetes;o__Pleosporales;f__Pleosporaceae;g__Curvularia;s__Curvularia_verruculosa;
Ilyonectria_sp	2.1e-05	4e-06	k__Fungi;p__Ascomycota;c__Sordariomycetes;o__Hypocreales;f__Nectriaceae;g__Ilyonectria;s__Ilyonectria_sp;
Marasmius_limosus	0	1.3e-05	k__Fungi;p__Basidiomycota;c__Agaricomycetes;o__Agaricales;f__Marasmiaceae;g__Marasmius;s__Marasmius_limosus;
Diversisporaceae_sp	0	1.3e-05	k__Fungi;p__Glomeromycota;c__Glomeromycetes;o__Diversisporales;f__Diversisporaceae;g__unidentified;s__Diversisporaceae_sp;
Magnaporthiopsis_panicorum	0	1.3e-05	k__Fungi;p__Ascomycota;c__Sordariomycetes;o__Magnaporthales;f__Magnaporthaceae;g__Magnaporthiopsis;s__Magnaporthiopsis_panicorum;
Penicillifer_diparietisporus	4e-06	1.3e-05	k__Fungi;p__Ascomycota;c__Sordariomycetes;o__Hypocreales;f__Nectriaceae;g__Penicillifer;s__Penicillifer_diparietisporus;
Lepiota_coloratipes	1.3e-05	1.3e-05	k__Fungi;p__Basidiomycota;c__Agaricomycetes;o__Agaricales;f__Agaricaceae;g__Lepiota;s__Lepiota_coloratipes;
Scopuloides_hydnoides	1.3e-05	0	k__Fungi;p__Basidiomycota;c__Agaricomycetes;o__Polyporales;f__Meruliaceae;g__Scopuloides;s__Scopuloides_hydnoides;
Farysia_acheniorum	0	2.1e-05	k__Fungi;p__Basidiomycota;c__Ustilaginomycetes;o__Ustilaginales;f__Ustilaginaceae;g__Farysia;s__Farysia_acheniorum;
Conioscypha_pleiomorpha	1.3e-05	4e-06	k__Fungi;p__Ascomycota;c__Sordariomycetes;o__Conioscyphales;f__Conioscyphaceae;g__Conioscypha;s__Conioscypha_pleiomorpha;
Monoblepharidomycetes_sp	4e-06	2.1e-05	k__Fungi;p__Monoblepharomycota;c__Monoblepharidomycetes;o__unidentified_Monoblepharidomycetes_sp;f__unidentified_Monoblepharidomycetes_sp;g__unidentified_Monoblepharidomycetes_sp;s__Monoblepharidomycetes_sp;
Tylopilus_sp	0	1.3e-05	k__Fungi;p__Basidiomycota;c__Agaricomycetes;o__Boletales;f__Boletaceae;g__Tylopilus;s__Tylopilus_sp;
Vararia_gomezii	1.3e-05	0	k__Fungi;p__Basidiomycota;c__Agaricomycetes;o__Russulales;f__Lachnocladiaceae;g__Vararia;s__Vararia_gomezii;
Tetracladium_furcatum	2.1e-05	1.7e-05	k__Fungi;p__Ascomycota;c__Leotiomycetes;o__Helotiales;f__Helotiaceae;g__Tetracladium;s__Tetracladium_furcatum;
Chaetosphaeria_sp	4e-06	1.7e-05	k__Fungi;p__Ascomycota;c__Sordariomycetes;o__Chaetosphaeriales;f__Chaetosphaeriaceae;g__Chaetosphaeria;s__Chaetosphaeria_sp;
Neopyrenochaeta_sp	1.3e-05	1.3e-05	k__Fungi;p__Ascomycota;c__Dothideomycetes;o__Pleosporales;f__Pyrenochaetopsidaceae;g__Neopyrenochaeta;s__Neopyrenochaeta_sp;
Hyalorbilia_fusispora	1.3e-05	8e-06	k__Fungi;p__Ascomycota;c__Orbiliomycetes;o__Orbiliales;f__Orbiliaceae;g__Hyalorbilia;s__Hyalorbilia_fusispora;
Pseudeurotium_sp	4e-06	1.3e-05	k__Fungi;p__Ascomycota;c__Leotiomycetes;o__Thelebolales;f__Pseudeurotiaceae;g__Pseudeurotium;s__Pseudeurotium_sp;
Atractospora_decumbens	1.3e-05	0	k__Fungi;p__Ascomycota;c__Sordariomycetes;o__Myrmecridiales;f__Myrmecridiales_fam_Incertae_sedis;g__Atractospora;s__Atractospora_decumbens;
Nigrospora_oryzae	8e-06	1.3e-05	k__Fungi;p__Ascomycota;c__Sordariomycetes;o__Trichosphaeriales;f__Trichosphaeriaceae;g__Nigrospora;s__Nigrospora_oryzae;
Xylodon_sambuci	0	1.3e-05	k__Fungi;p__Basidiomycota;c__Agaricomycetes;o__Hymenochaetales;f__Schizoporaceae;g__Xylodon;s__Xylodon_sambuci;
Cucurbitariaceae_sp	0	1.7e-05	k__Fungi;p__Ascomycota;c__Dothideomycetes;o__Pleosporales;f__Cucurbitariaceae;g__unidentified;s__Cucurbitariaceae_sp;
Thekopsora_sp	1.3e-05	0	k__Fungi;p__Basidiomycota;c__Pucciniomycetes;o__Pucciniales;f__Pucciniastraceae;g__Thekopsora;s__Thekopsora_sp;
Clavaria_sp	1.3e-05	0	k__Fungi;p__Basidiomycota;c__Agaricomycetes;o__Agaricales;f__Clavariaceae;g__Clavaria;s__Clavaria_sp;
Phylloporus_sp	4e-06	2.1e-05	k__Fungi;p__Basidiomycota;c__Agaricomycetes;o__Boletales;f__Boletaceae;g__Phylloporus;s__Phylloporus_sp;
Dactylella_lignatilis	4e-06	2.1e-05	k__Fungi;p__Ascomycota;c__Orbiliomycetes;o__Orbiliales;f__Orbiliaceae;g__Dactylella;s__Dactylella_lignatilis;
Wallemia_sebi	1.3e-05	0	k__Fungi;p__Basidiomycota;c__Wallemiomycetes;o__Wallemiales;f__Wallemiaceae;g__Wallemia;s__Wallemia_sebi;
Corticiaceae_sp	0	1.3e-05	k__Fungi;p__Basidiomycota;c__Agaricomycetes;o__Corticiales;f__Corticiaceae;g__unidentified;s__Corticiaceae_sp;
Lobulomyces_sp	8e-06	2.5e-05	k__Fungi;p__Chytridiomycota;c__Lobulomycetes;o__Lobulomycetales;f__Lobulomycetaceae;g__Lobulomyces;s__Lobulomyces_sp;
Acrocalymma_medicaginis	0	1.3e-05	k__Fungi;p__Ascomycota;c__Dothideomycetes;o__Pleosporales;f__Morosphaeriaceae;g__Acrocalymma;s__Acrocalymma_medicaginis;
Collarina_aurantiaca	1.3e-05	1.7e-05	k__Fungi;p__Ascomycota;c__Sordariomycetes;o__Hypocreales;f__Clavicipitaceae;g__Collarina;s__Collarina_aurantiaca;
Arthrographis_kalrae	1.3e-05	2.1e-05	k__Fungi;p__Ascomycota;c__Dothideomycetes;o__Dothideomycetes_ord_Incertae_sedis;f__Eremomycetaceae;g__Arthrographis;s__Arthrographis_kalrae;
Monilia_pruinosa	0	1.7e-05	k__Fungi;p__Ascomycota;c__Leotiomycetes;o__Helotiales;f__Sclerotiniaceae;g__Monilia;s__Monilia_pruinosa;
Phaeophleospora_sp	1.3e-05	4e-06	k__Fungi;p__Ascomycota;c__Dothideomycetes;o__Capnodiales;f__Mycosphaerellaceae;g__Phaeophleospora;s__Phaeophleospora_sp;
Gonapodya_prolifera	1.3e-05	4e-06	k__Fungi;p__Monoblepharomycota;c__Monoblepharidomycetes;o__Monoblepharidales;f__Gonapodyaceae;g__Gonapodya;s__Gonapodya_prolifera;
Drepanopeziza_populorum	2.1e-05	0	k__Fungi;p__Ascomycota;c__Leotiomycetes;o__Helotiales;f__Dermateaceae;g__Drepanopeziza;s__Drepanopeziza_populorum;
Malassezia_globosa	1.3e-05	0	k__Fungi;p__Basidiomycota;c__Malasseziomycetes;o__Malasseziales;f__Malasseziaceae;g__Malassezia;s__Malassezia_globosa;
Albonectria_rigidiuscula	1.3e-05	0	k__Fungi;p__Ascomycota;c__Sordariomycetes;o__Hypocreales;f__Nectriaceae;g__Albonectria;s__Albonectria_rigidiuscula;
Flavodon_sp	1.3e-05	2.1e-05	k__Fungi;p__Basidiomycota;c__Agaricomycetes;o__Polyporales;f__Irpicaceae;g__Flavodon;s__Flavodon_sp;
Laetiporus_sulphureus	1.3e-05	0	k__Fungi;p__Basidiomycota;c__Agaricomycetes;o__Polyporales;f__Fomitopsidaceae;g__Laetiporus;s__Laetiporus_sulphureus;
Pyrenochaetopsis_sp	1.3e-05	2.1e-05	k__Fungi;p__Ascomycota;c__Dothideomycetes;o__Pleosporales;f__Cucurbitariaceae;g__Pyrenochaetopsis;s__Pyrenochaetopsis_sp;
Kodamaea_anthophila	4e-06	2.1e-05	k__Fungi;p__Ascomycota;c__Saccharomycetes;o__Saccharomycetales;f__Metschnikowiaceae;g__Kodamaea;s__Kodamaea_anthophila;
Branch03_sp	0	1.3e-05	k__Fungi;p__Rozellomycota;c__Rozellomycotina_cls_Incertae_sedis;o__Branch03;f__unidentified_Branch03_sp;g__unidentified_Branch03_sp;s__Branch03_sp;
Cryptococcus_sp	1.7e-05	2.5e-05	k__Fungi;p__Basidiomycota;c__Tremellomycetes;o__Tremellales;f__Tremellaceae;g__Cryptococcus;s__Cryptococcus_sp;
Aspergillus_stellatus	1.3e-05	0	k__Fungi;p__Ascomycota;c__Eurotiomycetes;o__Eurotiales;f__Aspergillaceae;g__Aspergillus;s__Aspergillus_stellatus;
Microdiplodia_sp	0	1.3e-05	k__Fungi;p__Ascomycota;c__Dothideomycetes;o__Botryosphaeriales;f__Botryosphaeriaceae;g__Microdiplodia;s__Microdiplodia_sp;
Myxotrichaceae_sp	1.3e-05	0	k__Fungi;p__Ascomycota;c__Leotiomycetes;o__Helotiales;f__Myxotrichaceae;g__unidentified;s__Myxotrichaceae_sp;
Candida_tropicalis	0	1.7e-05	k__Fungi;p__Ascomycota;c__Saccharomycetes;o__Saccharomycetales;f__Saccharomycetales_fam_Incertae_sedis;g__Candida;s__Candida_tropicalis;
Talaromyces_flavus	8e-06	2.1e-05	k__Fungi;p__Ascomycota;c__Eurotiomycetes;o__Eurotiales;f__Trichocomaceae;g__Talaromyces;s__Talaromyces_flavus;
Entoloma_abortivum	1.3e-05	0	k__Fungi;p__Basidiomycota;c__Agaricomycetes;o__Agaricales;f__Entolomataceae;g__Entoloma;s__Entoloma_abortivum;
Crocicreas_multicuspidatum	2.5e-05	0	k__Fungi;p__Ascomycota;c__Leotiomycetes;o__Helotiales;f__Helotiaceae;g__Crocicreas;s__Crocicreas_multicuspidatum;
Acremonium_acutatum	2.5e-05	0	k__Fungi;p__Ascomycota;c__Sordariomycetes;o__Hypocreales;f__Hypocreales_fam_Incertae_sedis;g__Acremonium;s__Acremonium_acutatum;
Candida_ghanaensis	2.1e-05	4e-06	k__Fungi;p__Ascomycota;c__Saccharomycetes;o__Saccharomycetales;f__Saccharomycetales_fam_Incertae_sedis;g__Candida;s__Candida_ghanaensis;
Cyphellophora_oxyspora	1.3e-05	0	k__Fungi;p__Ascomycota;c__Eurotiomycetes;o__Chaetothyriales;f__Cyphellophoraceae;g__Cyphellophora;s__Cyphellophora_oxyspora;
Subulicystidium_obtusisporum	0	2.5e-05	k__Fungi;p__Basidiomycota;c__Agaricomycetes;o__Trechisporales;f__Hydnodontaceae;g__Subulicystidium;s__Subulicystidium_obtusisporum;
Microsphaeropsis_arundinis	8e-06	4.2e-05	k__Fungi;p__Ascomycota;c__Dothideomycetes;o__Pleosporales;f__Pleosporales_fam_Incertae_sedis;g__Microsphaeropsis;s__Microsphaeropsis_arundinis;
Trichoderma_virens	2.1e-05	1.7e-05	k__Fungi;p__Ascomycota;c__Sordariomycetes;o__Hypocreales;f__Hypocreaceae;g__Trichoderma;s__Trichoderma_virens;
Saccharomycopsis_capsularis	2.1e-05	0	k__Fungi;p__Ascomycota;c__Saccharomycetes;o__Saccharomycetales;f__Saccharomycopsidaceae;g__Saccharomycopsis;s__Saccharomycopsis_capsularis;
Phialophora_alba	1.3e-05	0	k__Fungi;p__Ascomycota;c__Eurotiomycetes;o__Chaetothyriales;f__Herpotrichiellaceae;g__Phialophora;s__Phialophora_alba;
Leotiomycetes_sp	4e-06	1.3e-05	k__Fungi;p__Ascomycota;c__Leotiomycetes;o__unidentified_Leotiomycetes_sp;f__unidentified_Leotiomycetes_sp;g__unidentified_Leotiomycetes_sp;s__Leotiomycetes_sp;
Saksenaea_vasiformis	0	1.3e-05	k__Fungi;p__Mucoromycota;c__Mucoromycetes;o__Mucorales;f__Saksenaeaceae;g__Saksenaea;s__Saksenaea_vasiformis;
Striatibotrys_rhabdospora	4e-06	1.3e-05	k__Fungi;p__Ascomycota;c__Sordariomycetes;o__Hypocreales;f__Stachybotryaceae;g__Striatibotrys;s__Striatibotrys_rhabdospora;
Talaromyces_trachyspermus	0	3e-05	k__Fungi;p__Ascomycota;c__Eurotiomycetes;o__Eurotiales;f__Trichocomaceae;g__Talaromyces;s__Talaromyces_trachyspermus;
Didymella_astragalina	2.1e-05	4e-06	k__Fungi;p__Ascomycota;c__Dothideomycetes;o__Pleosporales;f__Didymellaceae;g__Didymella;s__Didymella_astragalina;
Paraboeremia_sp	0	1.3e-05	k__Fungi;p__Ascomycota;c__Dothideomycetes;o__Pleosporales;f__Didymellaceae;g__Paraboeremia;s__Paraboeremia_sp;
Pseudopithomyces_chartarum	0	2.1e-05	k__Fungi;p__Ascomycota;c__Dothideomycetes;o__Pleosporales;f__Didymosphaeriaceae;g__Pseudopithomyces;s__Pseudopithomyces_chartarum;
Microdochium_bolleyi	8e-06	1.3e-05	k__Fungi;p__Ascomycota;c__Sordariomycetes;o__Xylariales;f__Microdochiaceae;g__Microdochium;s__Microdochium_bolleyi;
Scedosporium_dehoogii	1.7e-05	1.3e-05	k__Fungi;p__Ascomycota;c__Sordariomycetes;o__Microascales;f__Microascaceae;g__Scedosporium;s__Scedosporium_dehoogii;
Bolbitius_lacteus	1.3e-05	0	k__Fungi;p__Basidiomycota;c__Agaricomycetes;o__Agaricales;f__Bolbitiaceae;g__Bolbitius;s__Bolbitius_lacteus;
Myrmecridium_thailandicum	2.1e-05	8e-06	k__Fungi;p__Ascomycota;c__Sordariomycetes;o__Myrmecridiales;f__Myrmecridiaceae;g__Myrmecridium;s__Myrmecridium_thailandicum;
Leptosphaeria_heterospora	8e-06	2.5e-05	k__Fungi;p__Ascomycota;c__Dothideomycetes;o__Pleosporales;f__Leptosphaeriaceae;g__Leptosphaeria;s__Leptosphaeria_heterospora;
Nowakowskiella_multispora	4e-06	1.3e-05	k__Fungi;p__Chytridiomycota;c__Cladochytriomycetes;o__Cladochytriales;f__Nowakowskiellaceae;g__Nowakowskiella;s__Nowakowskiella_multispora;
Magnaporthiopsis_sp	1.7e-05	1.7e-05	k__Fungi;p__Ascomycota;c__Sordariomycetes;o__Magnaporthales;f__Magnaporthaceae;g__Magnaporthiopsis;s__Magnaporthiopsis_sp;
Auxarthron_sp	1.3e-05	0	k__Fungi;p__Ascomycota;c__Eurotiomycetes;o__Onygenales;f__Onygenaceae;g__Auxarthron;s__Auxarthron_sp;
Ceratostomataceae_sp	1.3e-05	4e-06	k__Fungi;p__Ascomycota;c__Sordariomycetes;o__Melanosporales;f__Ceratostomataceae;g__unidentified;s__Ceratostomataceae_sp;
Corallomycetella_repens	1.3e-05	1.3e-05	k__Fungi;p__Ascomycota;c__Sordariomycetes;o__Hypocreales;f__Nectriaceae;g__Corallomycetella;s__Corallomycetella_repens;
Ascochyta_paspali	2.1e-05	4e-06	k__Fungi;p__Ascomycota;c__Dothideomycetes;o__Pleosporales;f__Didymellaceae;g__Ascochyta;s__Ascochyta_paspali;
Fonsecazyma_sp	1.3e-05	8e-06	k__Fungi;p__Basidiomycota;c__Tremellomycetes;o__Tremellales;f__Bulleraceae;g__Fonsecazyma;s__Fonsecazyma_sp;
Thelonectria_westlandica	1.3e-05	0	k__Fungi;p__Ascomycota;c__Sordariomycetes;o__Hypocreales;f__Nectriaceae;g__Thelonectria;s__Thelonectria_westlandica;
Arthrophiala_arthrospora	8e-06	2.5e-05	k__Fungi;p__Ascomycota;c__Eurotiomycetes;o__Chaetothyriales;f__Chaetothyriaceae;g__Arthrophiala;s__Arthrophiala_arthrospora;
Macroconia_leptosphaeriae	1.3e-05	4e-06	k__Fungi;p__Ascomycota;c__Sordariomycetes;o__Hypocreales;f__Nectriaceae;g__Macroconia;s__Macroconia_leptosphaeriae;
Pannaria_hookeri	8e-06	1.3e-05	k__Fungi;p__Ascomycota;c__Lecanoromycetes;o__Peltigerales;f__Pannariaceae;g__Pannaria;s__Pannaria_hookeri;
Chrysosporium_fluviale	1.3e-05	1.3e-05	k__Fungi;p__Ascomycota;c__Eurotiomycetes;o__Onygenales;f__Onygenales_fam_Incertae_sedis;g__Chrysosporium;s__Chrysosporium_fluviale;
Inocybe_serotina	0	1.3e-05	k__Fungi;p__Basidiomycota;c__Agaricomycetes;o__Agaricales;f__Inocybaceae;g__Inocybe;s__Inocybe_serotina;
Geopora_sp	1.7e-05	0	k__Fungi;p__Ascomycota;c__Pezizomycetes;o__Pezizales;f__Pyronemataceae;g__Geopora;s__Geopora_sp;
Gymnoascus_sp	1.3e-05	1.3e-05	k__Fungi;p__Ascomycota;c__Eurotiomycetes;o__Onygenales;f__Gymnoascaceae;g__Gymnoascus;s__Gymnoascus_sp;
Piedraia_sp	4e-06	3e-05	k__Fungi;p__Ascomycota;c__Dothideomycetes;o__Capnodiales;f__Piedraiaceae;g__Piedraia;s__Piedraia_sp;
Psathyrella_ammophila	1.3e-05	0	k__Fungi;p__Basidiomycota;c__Agaricomycetes;o__Agaricales;f__Psathyrellaceae;g__Psathyrella;s__Psathyrella_ammophila;
Badarisama_sojae	8e-06	4e-06	k__Fungi;p__Ascomycota;c__Pezizomycotina_cls_Incertae_sedis;o__Pezizomycotina_ord_Incertae_sedis;f__Pezizomycotina_fam_Incertae_sedis;g__Badarisama;s__Badarisama_sojae;
Candida_parapsilosis	1.7e-05	1.7e-05	k__Fungi;p__Ascomycota;c__Saccharomycetes;o__Saccharomycetales;f__Saccharomycetales_fam_Incertae_sedis;g__Candida;s__Candida_parapsilosis;
Conlarium_sp	0	8e-06	k__Fungi;p__Ascomycota;c__Sordariomycetes;o__Sordariales;f__Sordariales_fam_Incertae_sedis;g__Conlarium;s__Conlarium_sp;
Calceomyces_lacunosus	0	8e-06	k__Fungi;p__Ascomycota;c__Sordariomycetes;o__Xylariales;f__Xylariaceae;g__Calceomyces;s__Calceomyces_lacunosus;
Amanita_peckiana	4e-06	8e-06	k__Fungi;p__Basidiomycota;c__Agaricomycetes;o__Agaricales;f__Amanitaceae;g__Amanita;s__Amanita_peckiana;
Chytridiaceae_sp	0	2.1e-05	k__Fungi;p__Chytridiomycota;c__Chytridiomycetes;o__Chytridiales;f__Chytridiaceae;g__unidentified;s__Chytridiaceae_sp;
Aphanoascus_sp	2.1e-05	1.7e-05	k__Fungi;p__Ascomycota;c__Eurotiomycetes;o__Onygenales;f__Onygenaceae;g__Aphanoascus;s__Aphanoascus_sp;
Fusariella_sp	8e-06	4e-06	k__Fungi;p__Ascomycota;c__Sordariomycetes;o__Hypocreales;f__Hypocreales_fam_Incertae_sedis;g__Fusariella;s__Fusariella_sp;
Saksenaea_sp	0	8e-06	k__Fungi;p__Mucoromycota;c__Mucoromycetes;o__Mucorales;f__Saksenaeaceae;g__Saksenaea;s__Saksenaea_sp;
Lipomyces_spencermartinsiae	0	1.7e-05	k__Fungi;p__Ascomycota;c__Saccharomycetes;o__Saccharomycetales;f__Lipomycetaceae;g__Lipomyces;s__Lipomyces_spencermartinsiae;
Syncephalis_fuscata	8e-06	0	k__Fungi;p__Zoopagomycota;c__Zoopagomycetes;o__Zoopagales;f__Piptocephalidaceae;g__Syncephalis;s__Syncephalis_fuscata;
Penicillium_terrigenum	8e-06	1.3e-05	k__Fungi;p__Ascomycota;c__Eurotiomycetes;o__Eurotiales;f__Aspergillaceae;g__Penicillium;s__Penicillium_terrigenum;
Conocybe_karinae	4e-06	1.7e-05	k__Fungi;p__Basidiomycota;c__Agaricomycetes;o__Agaricales;f__Bolbitiaceae;g__Conocybe;s__Conocybe_karinae;
Scutellinia_colensoi	1.7e-05	0	k__Fungi;p__Ascomycota;c__Pezizomycetes;o__Pezizales;f__Pyronemataceae;g__Scutellinia;s__Scutellinia_colensoi;
Heterotextus_miltinus	1.7e-05	0	k__Fungi;p__Basidiomycota;c__Dacrymycetes;o__Dacrymycetales;f__Dacrymycetaceae;g__Heterotextus;s__Heterotextus_miltinus;
Lecanoromycetes_sp	8e-06	0	k__Fungi;p__Ascomycota;c__Lecanoromycetes;o__unidentified_Lecanoromycetes_sp;f__unidentified_Lecanoromycetes_sp;g__unidentified_Lecanoromycetes_sp;s__Lecanoromycetes_sp;
Sugiyamaella_mastotermitis	1.3e-05	4e-06	k__Fungi;p__Ascomycota;c__Saccharomycetes;o__Saccharomycetales;f__Trichomonascaceae;g__Sugiyamaella;s__Sugiyamaella_mastotermitis;
Stachybotrys_sp	0	8e-06	k__Fungi;p__Ascomycota;c__Sordariomycetes;o__Hypocreales;f__Stachybotryaceae;g__Stachybotrys;s__Stachybotrys_sp;
Rhodotorula_mucilaginosa	8e-06	0	k__Fungi;p__Basidiomycota;c__Microbotryomycetes;o__Sporidiobolales;f__Sporidiobolaceae;g__Rhodotorula;s__Rhodotorula_mucilaginosa;
Funneliformis_sp	0	1.7e-05	k__Fungi;p__Glomeromycota;c__Glomeromycetes;o__Glomerales;f__Glomeraceae;g__Funneliformis;s__Funneliformis_sp;
Pleurostoma_richardsiae	1.7e-05	8e-06	k__Fungi;p__Ascomycota;c__Sordariomycetes;o__Calosphaeriales;f__Pleurostomataceae;g__Pleurostoma;s__Pleurostoma_richardsiae;
Cryptococcus_aspenensis	8e-06	4e-06	k__Fungi;p__Basidiomycota;c__Tremellomycetes;o__Tremellales;f__Tremellaceae;g__Cryptococcus;s__Cryptococcus_aspenensis;
Cutaneotrichosporon_curvatum	0	8e-06	k__Fungi;p__Basidiomycota;c__Tremellomycetes;o__Trichosporonales;f__Trichosporonaceae;g__Cutaneotrichosporon;s__Cutaneotrichosporon_curvatum;
Phialemonium_dimorphosporum	0	8e-06	k__Fungi;p__Ascomycota;c__Sordariomycetes;o__Sordariales;f__Cephalothecaceae;g__Phialemonium;s__Phialemonium_dimorphosporum;
Botryotrichum_spirotrichum	4e-06	8e-06	k__Fungi;p__Ascomycota;c__Sordariomycetes;o__Sordariales;f__Chaetomiaceae;g__Botryotrichum;s__Botryotrichum_spirotrichum;
Biscogniauxia_sp	0	8e-06	k__Fungi;p__Ascomycota;c__Sordariomycetes;o__Xylariales;f__Xylariaceae;g__Biscogniauxia;s__Biscogniauxia_sp;
Capnodiales_sp	0	8e-06	k__Fungi;p__Ascomycota;c__Dothideomycetes;o__Capnodiales;f__unidentified_Capnodiales_sp;g__unidentified_Capnodiales_sp;s__Capnodiales_sp;
Hydropunctaria_maura	0	8e-06	k__Fungi;p__Ascomycota;c__Eurotiomycetes;o__Verrucariales;f__Verrucariaceae;g__Hydropunctaria;s__Hydropunctaria_maura;
Buellia_sp	8e-06	4e-06	k__Fungi;p__Ascomycota;c__Lecanoromycetes;o__Caliciales;f__Caliciaceae;g__Buellia;s__Buellia_sp;
Ganoderma_sp	4e-06	1.3e-05	k__Fungi;p__Basidiomycota;c__Agaricomycetes;o__Polyporales;f__Ganodermataceae;g__Ganoderma;s__Ganoderma_sp;
Postia_stiptica	8e-06	0	k__Fungi;p__Basidiomycota;c__Agaricomycetes;o__Polyporales;f__Fomitopsidaceae;g__Postia;s__Postia_stiptica;
Thelonectria_sinensis	8e-06	0	k__Fungi;p__Ascomycota;c__Sordariomycetes;o__Hypocreales;f__Nectriaceae;g__Thelonectria;s__Thelonectria_sinensis;
Schizothecium_tetrasporum	8e-06	4e-06	k__Fungi;p__Ascomycota;c__Sordariomycetes;o__Sordariales;f__Lasiosphaeriaceae;g__Schizothecium;s__Schizothecium_tetrasporum;
Tremella_mesenterica	8e-06	4e-06	k__Fungi;p__Basidiomycota;c__Tremellomycetes;o__Tremellales;f__Tremellaceae;g__Tremella;s__Tremella_mesenterica;
Halotthiaceae_sp	8e-06	0	k__Fungi;p__Ascomycota;c__Dothideomycetes;o__Pleosporales;f__Halotthiaceae;g__unidentified;s__Halotthiaceae_sp;
Bipolaris_sp	3.4e-05	1.7e-05	k__Fungi;p__Ascomycota;c__Dothideomycetes;o__Pleosporales;f__Pleosporaceae;g__Bipolaris;s__Bipolaris_sp;
Leucangium_carthusianum	1.3e-05	0	k__Fungi;p__Ascomycota;c__Pezizomycetes;o__Pezizales;f__Discinaceae;g__Leucangium;s__Leucangium_carthusianum;
Pichia_bruneiensis	8e-06	0	k__Fungi;p__Ascomycota;c__Saccharomycetes;o__Saccharomycetales;f__Pichiaceae;g__Pichia;s__Pichia_bruneiensis;
Filobasidiales_sp	8e-06	0	k__Fungi;p__Basidiomycota;c__Tremellomycetes;o__Filobasidiales;f__unidentified_Filobasidiales_sp;g__unidentified_Filobasidiales_sp;s__Filobasidiales_sp;
Phanerochaete_sp	0	8e-06	k__Fungi;p__Basidiomycota;c__Agaricomycetes;o__Polyporales;f__Phanerochaetaceae;g__Phanerochaete;s__Phanerochaete_sp;
Amaurascopsis_perforata	1.7e-05	0	k__Fungi;p__Ascomycota;c__Eurotiomycetes;o__Onygenales;f__Onygenaceae;g__Amaurascopsis;s__Amaurascopsis_perforata;
Inocybe_maculata	8e-06	0	k__Fungi;p__Basidiomycota;c__Agaricomycetes;o__Agaricales;f__Inocybaceae;g__Inocybe;s__Inocybe_maculata;
Onygenaceae_sp	8e-06	8e-06	k__Fungi;p__Ascomycota;c__Eurotiomycetes;o__Onygenales;f__Onygenaceae;g__unidentified;s__Onygenaceae_sp;
Alternaria_longissima	0	8e-06	k__Fungi;p__Ascomycota;c__Dothideomycetes;o__Pleosporales;f__Pleosporaceae;g__Alternaria;s__Alternaria_longissima;
Pyrenula_inframamillana	8e-06	1.3e-05	k__Fungi;p__Ascomycota;c__Eurotiomycetes;o__Pyrenulales;f__Pyrenulaceae;g__Pyrenula;s__Pyrenula_inframamillana;
Ionaspis_lacustris	8e-06	0	k__Fungi;p__Ascomycota;c__Lecanoromycetes;o__Hymeneliales;f__Hymeneliaceae;g__Ionaspis;s__Ionaspis_lacustris;
Apiotrichum_mycotoxinivorans	0	8e-06	k__Fungi;p__Basidiomycota;c__Tremellomycetes;o__Trichosporonales;f__Trichosporonaceae;g__Apiotrichum;s__Apiotrichum_mycotoxinivorans;
Rhodotorula_sp	8e-06	0	k__Fungi;p__Basidiomycota;c__Microbotryomycetes;o__Sporidiobolales;f__Sporidiobolaceae;g__Rhodotorula;s__Rhodotorula_sp;
Helvella_elastica	0	8e-06	k__Fungi;p__Ascomycota;c__Pezizomycetes;o__Pezizales;f__Helvellaceae;g__Helvella;s__Helvella_elastica;
Tremella_sp	8e-06	0	k__Fungi;p__Basidiomycota;c__Tremellomycetes;o__Tremellales;f__Tremellaceae;g__Tremella;s__Tremella_sp;
Polyporus_sp	0	8e-06	k__Fungi;p__Basidiomycota;c__Agaricomycetes;o__Polyporales;f__Polyporaceae;g__Polyporus;s__Polyporus_sp;
Trichosporon_asahii	1.3e-05	4e-06	k__Fungi;p__Basidiomycota;c__Tremellomycetes;o__Trichosporonales;f__Trichosporonaceae;g__Trichosporon;s__Trichosporon_asahii;
Valsaria_insitiva	0	1.7e-05	k__Fungi;p__Ascomycota;c__Dothideomycetes;o__Valsariales;f__Valsariaceae;g__Valsaria;s__Valsaria_insitiva;
Moniliella_sp	0	8e-06	k__Fungi;p__Basidiomycota;c__Moniliellomycetes;o__Moniliellales;f__Moniliellaceae;g__Moniliella;s__Moniliella_sp;
Atractium_crassum	1.7e-05	4e-06	k__Fungi;p__Ascomycota;c__Sordariomycetes;o__Hypocreales;f__Nectriaceae;g__Atractium;s__Atractium_crassum;
Helicoma_isiola	0	8e-06	k__Fungi;p__Ascomycota;c__Dothideomycetes;o__Tubeufiales;f__Tubeufiaceae;g__Helicoma;s__Helicoma_isiola;
Ramicandelaber_sp	8e-06	0	k__Fungi;p__Kickxellomycota;c__Kickxellomycetes;o__Kickxellales;f__Kickxellaceae;g__Ramicandelaber;s__Ramicandelaber_sp;
Sympodiella_multiseptata	8e-06	8e-06	k__Fungi;p__Ascomycota;c__Dothideomycetes;o__Venturiales;f__Venturiaceae;g__Sympodiella;s__Sympodiella_multiseptata;
Camarophyllopsis_atrovelutina	8e-06	0	k__Fungi;p__Basidiomycota;c__Agaricomycetes;o__Agaricales;f__Clavariaceae;g__Camarophyllopsis;s__Camarophyllopsis_atrovelutina;
Geastrum_lageniforme	8e-06	4e-06	k__Fungi;p__Basidiomycota;c__Agaricomycetes;o__Geastrales;f__Geastraceae;g__Geastrum;s__Geastrum_lageniforme;
Lapidomyces_sp	8e-06	8e-06	k__Fungi;p__Ascomycota;c__Dothideomycetes;o__Capnodiales;f__Teratosphaeriaceae;g__Lapidomyces;s__Lapidomyces_sp;
Pithya_vulgaris	8e-06	8e-06	k__Fungi;p__Ascomycota;c__Pezizomycetes;o__Pezizales;f__Sarcoscyphaceae;g__Pithya;s__Pithya_vulgaris;
Barbatospora_ambicaudata	8e-06	4e-06	k__Fungi;p__Kickxellomycota;c__Barbatosporomycetes;o__Barbatosporales;f__Barbatosporaceae;g__Barbatospora;s__Barbatospora_ambicaudata;
Hypoxylon_sp	1.3e-05	0	k__Fungi;p__Ascomycota;c__Sordariomycetes;o__Xylariales;f__Xylariaceae;g__Hypoxylon;s__Hypoxylon_sp;
Arthrobotrys_clavispora	1.3e-05	8e-06	k__Fungi;p__Ascomycota;c__Orbiliomycetes;o__Orbiliales;f__Orbiliaceae;g__Arthrobotrys;s__Arthrobotrys_clavispora;
Talaromyces_columbinus	4e-06	8e-06	k__Fungi;p__Ascomycota;c__Eurotiomycetes;o__Eurotiales;f__Trichocomaceae;g__Talaromyces;s__Talaromyces_columbinus;
Monographella_sp	0	8e-06	k__Fungi;p__Ascomycota;c__Sordariomycetes;o__Xylariales;f__Hyponectriaceae;g__Monographella;s__Monographella_sp;
Tricholoma_saponaceum	8e-06	0	k__Fungi;p__Basidiomycota;c__Agaricomycetes;o__Agaricales;f__Tricholomataceae;g__Tricholoma;s__Tricholoma_saponaceum;
Leucocortinarius_bulbiger	1.3e-05	0	k__Fungi;p__Basidiomycota;c__Agaricomycetes;o__Agaricales;f__Cortinariaceae;g__Leucocortinarius;s__Leucocortinarius_bulbiger;
Monacrosporium_tentaculatum	8e-06	0	k__Fungi;p__Ascomycota;c__Orbiliomycetes;o__Orbiliales;f__Orbiliaceae;g__Monacrosporium;s__Monacrosporium_tentaculatum;
Dioszegia_sp	4e-06	8e-06	k__Fungi;p__Basidiomycota;c__Tremellomycetes;o__Tremellales;f__Bulleribasidiaceae;g__Dioszegia;s__Dioszegia_sp;
Xylodon_hyphodontinus	1.3e-05	0	k__Fungi;p__Basidiomycota;c__Agaricomycetes;o__Hymenochaetales;f__Schizoporaceae;g__Xylodon;s__Xylodon_hyphodontinus;
Lepiota_echinella	8e-06	0	k__Fungi;p__Basidiomycota;c__Agaricomycetes;o__Agaricales;f__Agaricaceae;g__Lepiota;s__Lepiota_echinella;
Candida_insectalens	1.7e-05	4e-06	k__Fungi;p__Ascomycota;c__Saccharomycetes;o__Saccharomycetales;f__Saccharomycetales_fam_Incertae_sedis;g__Candida;s__Candida_insectalens;
Rachicladosporium_eucalypti	8e-06	8e-06	k__Fungi;p__Ascomycota;c__Dothideomycetes;o__Capnodiales;f__Cladosporiaceae;g__Rachicladosporium;s__Rachicladosporium_eucalypti;
Solicoccozyma_aeria	0	8e-06	k__Fungi;p__Basidiomycota;c__Tremellomycetes;o__Filobasidiales;f__Piskurozymaceae;g__Solicoccozyma;s__Solicoccozyma_aeria;
Geopyxis_sp	4e-06	8e-06	k__Fungi;p__Ascomycota;c__Pezizomycetes;o__Pezizales;f__Pyronemataceae;g__Geopyxis;s__Geopyxis_sp;
Ustilaginoidea_sp	1.3e-05	8e-06	k__Fungi;p__Ascomycota;c__Sordariomycetes;o__Hypocreales;f__Hypocreales_fam_Incertae_sedis;g__Ustilaginoidea;s__Ustilaginoidea_sp;
Monocillium_griseo-ochraceum	1.3e-05	4e-06	k__Fungi;p__Ascomycota;c__Sordariomycetes;o__Hypocreales;f__Hypocreaceae;g__Monocillium;s__Monocillium_griseo-ochraceum;
Coniochaeta_fasciculata	8e-06	0	k__Fungi;p__Ascomycota;c__Sordariomycetes;o__Coniochaetales;f__Coniochaetaceae;g__Coniochaeta;s__Coniochaeta_fasciculata;
Bolbitiaceae_sp	8e-06	4e-06	k__Fungi;p__Basidiomycota;c__Agaricomycetes;o__Agaricales;f__Bolbitiaceae;g__unidentified;s__Bolbitiaceae_sp;
Physalacria_stilboidea	8e-06	8e-06	k__Fungi;p__Basidiomycota;c__Agaricomycetes;o__Agaricales;f__Physalacriaceae;g__Physalacria;s__Physalacria_stilboidea;
Thysanorea_papuana	8e-06	4e-06	k__Fungi;p__Ascomycota;c__Eurotiomycetes;o__Chaetothyriales;f__Herpotrichiellaceae;g__Thysanorea;s__Thysanorea_papuana;
Phycomyces_nitens	8e-06	0	k__Fungi;p__Mucoromycota;c__Mucoromycetes;o__Mucorales;f__Phycomycetaceae;g__Phycomyces;s__Phycomyces_nitens;
Multifurca_sp	8e-06	8e-06	k__Fungi;p__Basidiomycota;c__Agaricomycetes;o__Russulales;f__Russulaceae;g__Multifurca;s__Multifurca_sp;
Aphelidiomycota_sp	1.3e-05	1.3e-05	k__Fungi;p__Aphelidiomycota;c__unidentified_Aphelidiomycota_sp;o__unidentified_Aphelidiomycota_sp;f__unidentified_Aphelidiomycota_sp;g__unidentified_Aphelidiomycota_sp;s__Aphelidiomycota_sp;
Acremonium_pinkertoniae	0	8e-06	k__Fungi;p__Ascomycota;c__Sordariomycetes;o__Hypocreales;f__Hypocreales_fam_Incertae_sedis;g__Acremonium;s__Acremonium_pinkertoniae;
Penicillium_brevicompactum	4e-06	8e-06	k__Fungi;p__Ascomycota;c__Eurotiomycetes;o__Eurotiales;f__Aspergillaceae;g__Penicillium;s__Penicillium_brevicompactum;
Candida_blankii	1.3e-05	8e-06	k__Fungi;p__Ascomycota;c__Saccharomycetes;o__Saccharomycetales;f__Saccharomycetales_fam_Incertae_sedis;g__Candida;s__Candida_blankii;
Mycoleptodiscus_indicus	0	8e-06	k__Fungi;p__Ascomycota;c__Sordariomycetes;o__Magnaporthales;f__Magnaporthaceae;g__Mycoleptodiscus;s__Mycoleptodiscus_indicus;
Acrocalymma_vagum	3e-05	4e-06	k__Fungi;p__Ascomycota;c__Dothideomycetes;o__Pleosporales;f__Morosphaeriaceae;g__Acrocalymma;s__Acrocalymma_vagum;
Boletus_subglabripes	0	1.3e-05	k__Fungi;p__Basidiomycota;c__Agaricomycetes;o__Boletales;f__Boletaceae;g__Boletus;s__Boletus_subglabripes;
Coniochaeta_ligniaria	8e-06	8e-06	k__Fungi;p__Ascomycota;c__Sordariomycetes;o__Coniochaetales;f__Coniochaetaceae;g__Coniochaeta;s__Coniochaeta_ligniaria;
Cladosporium_velox	8e-06	8e-06	k__Fungi;p__Ascomycota;c__Dothideomycetes;o__Capnodiales;f__Cladosporiaceae;g__Cladosporium;s__Cladosporium_velox;
Talaromyces_stipitatus	0	8e-06	k__Fungi;p__Ascomycota;c__Eurotiomycetes;o__Eurotiales;f__Trichocomaceae;g__Talaromyces;s__Talaromyces_stipitatus;
Cirrenalia_iberica	4e-06	8e-06	k__Fungi;p__Ascomycota;c__Sordariomycetes;o__Microascales;f__Halosphaeriaceae;g__Cirrenalia;s__Cirrenalia_iberica;
Monocillium_loricatum	0	8e-06	k__Fungi;p__Ascomycota;c__Sordariomycetes;o__Hypocreales;f__Hypocreaceae;g__Monocillium;s__Monocillium_loricatum;
Torula_herbarum	0	1.3e-05	k__Fungi;p__Ascomycota;c__Dothideomycetes;o__Pleosporales;f__Torulaceae;g__Torula;s__Torula_herbarum;
Scytalidium_circinatum	8e-06	0	k__Fungi;p__Ascomycota;c__Leotiomycetes;o__Helotiales;f__Helotiaceae;g__Scytalidium;s__Scytalidium_circinatum;
Pilobolus_crystallinus	0	8e-06	k__Fungi;p__Mucoromycota;c__Mucoromycetes;o__Mucorales;f__Pilobolaceae;g__Pilobolus;s__Pilobolus_crystallinus;
Anixiopsis_catenata	8e-06	2.1e-05	k__Fungi;p__Ascomycota;c__Eurotiomycetes;o__Onygenales;f__Onygenaceae;g__Anixiopsis;s__Anixiopsis_catenata;
Graphium_sp	1.3e-05	0	k__Fungi;p__Ascomycota;c__Sordariomycetes;o__Microascales;f__Graphiaceae;g__Graphium;s__Graphium_sp;
Basidiobolus_ranarum	0	8e-06	k__Fungi;p__Basidiobolomycota;c__Basidiobolomycetes;o__Basidiobolales;f__Basidiobolaceae;g__Basidiobolus;s__Basidiobolus_ranarum;
Sampaiozyma_ingeniosa	4e-06	8e-06	k__Fungi;p__Basidiomycota;c__Microbotryomycetes;o__Microbotryomycetes_ord_Incertae_sedis;f__Chrysozymaceae;g__Sampaiozyma;s__Sampaiozyma_ingeniosa;
Vishniacozyma_sp	8e-06	8e-06	k__Fungi;p__Basidiomycota;c__Tremellomycetes;o__Tremellales;f__Bulleribasidiaceae;g__Vishniacozyma;s__Vishniacozyma_sp;
Fonsecazyma_mujuensis	8e-06	0	k__Fungi;p__Basidiomycota;c__Tremellomycetes;o__Tremellales;f__Bulleraceae;g__Fonsecazyma;s__Fonsecazyma_mujuensis;
Athelia_rolfsii	0	1.7e-05	k__Fungi;p__Basidiomycota;c__Agaricomycetes;o__Atheliales;f__Atheliaceae;g__Athelia;s__Athelia_rolfsii;
Spizellomyces_punctatus	0	8e-06	k__Fungi;p__Chytridiomycota;c__Spizellomycetes;o__Spizellomycetales;f__Spizellomycetaceae;g__Spizellomyces;s__Spizellomyces_punctatus;
Phallus_haitangensis	8e-06	8e-06	k__Fungi;p__Basidiomycota;c__Agaricomycetes;o__Phallales;f__Phallaceae;g__Phallus;s__Phallus_haitangensis;
Spegazzinia_parkeri	1.3e-05	0	k__Fungi;p__Ascomycota;c__Dothideomycetes;o__Pleosporales;f__Didymosphaeriaceae;g__Spegazzinia;s__Spegazzinia_parkeri;
Peziza_sp	8e-06	0	k__Fungi;p__Ascomycota;c__Pezizomycetes;o__Pezizales;f__Pezizaceae;g__Peziza;s__Peziza_sp;
Cutaneotrichosporon_sp	0	8e-06	k__Fungi;p__Basidiomycota;c__Tremellomycetes;o__Trichosporonales;f__Trichosporonaceae;g__Cutaneotrichosporon;s__Cutaneotrichosporon_sp;
Aphanoascus_terreus	0	8e-06	k__Fungi;p__Ascomycota;c__Eurotiomycetes;o__Onygenales;f__Onygenaceae;g__Aphanoascus;s__Aphanoascus_terreus;
Candelabrum_brocchiatum	0	8e-06	k__Fungi;p__Ascomycota;c__Pezizomycotina_cls_Incertae_sedis;o__Pezizomycotina_ord_Incertae_sedis;f__Pezizomycotina_fam_Incertae_sedis;g__Candelabrum;s__Candelabrum_brocchiatum;
Sebacinales_sp	8e-06	0	k__Fungi;p__Basidiomycota;c__Agaricomycetes;o__Sebacinales;f__unidentified_Sebacinales_sp;g__unidentified_Sebacinales_sp;s__Sebacinales_sp;
Trichoderma_viride	0	8e-06	k__Fungi;p__Ascomycota;c__Sordariomycetes;o__Hypocreales;f__Hypocreaceae;g__Trichoderma;s__Trichoderma_viride;
Lobulomyces_poculatus	8e-06	1.7e-05	k__Fungi;p__Chytridiomycota;c__Lobulomycetes;o__Lobulomycetales;f__Lobulomycetaceae;g__Lobulomyces;s__Lobulomyces_poculatus;
Papulaspora_nishigaharana	0	8e-06	k__Fungi;p__Ascomycota;c__Sordariomycetes;o__Sordariales;f__Sordariales_fam_Incertae_sedis;g__Papulaspora;s__Papulaspora_nishigaharana;
Metschnikowia_sp	8e-06	0	k__Fungi;p__Ascomycota;c__Saccharomycetes;o__Saccharomycetales;f__Metschnikowiaceae;g__Metschnikowia;s__Metschnikowia_sp;
Angulomyces_argentinensis	0	8e-06	k__Fungi;p__Chytridiomycota;c__Rhizophydiomycetes;o__Rhizophydiales;f__Angulomycetaceae;g__Angulomyces;s__Angulomyces_argentinensis;
Scutellinia_erinaceus	0	8e-06	k__Fungi;p__Ascomycota;c__Pezizomycetes;o__Pezizales;f__Pyronemataceae;g__Scutellinia;s__Scutellinia_erinaceus;
Epicoccum_proteae	8e-06	0	k__Fungi;p__Ascomycota;c__Dothideomycetes;o__Pleosporales;f__Didymellaceae;g__Epicoccum;s__Epicoccum_proteae;
Phoma_herbarum	4e-06	1.3e-05	k__Fungi;p__Ascomycota;c__Dothideomycetes;o__Pleosporales;f__Didymellaceae;g__Phoma;s__Phoma_herbarum;
Ceratobasidiaceae_sp	0	8e-06	k__Fungi;p__Basidiomycota;c__Agaricomycetes;o__Cantharellales;f__Ceratobasidiaceae;g__unidentified;s__Ceratobasidiaceae_sp;
Lasiobolidium_spirale	0	8e-06	k__Fungi;p__Ascomycota;c__Pezizomycetes;o__Pezizales;f__Pyronemataceae;g__Lasiobolidium;s__Lasiobolidium_spirale;
Gelasinospora_cerealis	8e-06	4e-06	k__Fungi;p__Ascomycota;c__Sordariomycetes;o__Sordariales;f__Sordariaceae;g__Gelasinospora;s__Gelasinospora_cerealis;
Monodictys_bicolorata	1.3e-05	1.3e-05	k__Fungi;p__Ascomycota;c__Dothideomycetes;o__Pleosporales;f__Pleosporales_fam_Incertae_sedis;g__Monodictys;s__Monodictys_bicolorata;
Oidiodendron_sp	1.3e-05	0	k__Fungi;p__Ascomycota;c__Leotiomycetes;o__Helotiales;f__Myxotrichaceae;g__Oidiodendron;s__Oidiodendron_sp;
Setophaeosphaeria_citricola	0	8e-06	k__Fungi;p__Ascomycota;c__Dothideomycetes;o__Pleosporales;f__Phaeosphaeriaceae;g__Setophaeosphaeria;s__Setophaeosphaeria_citricola;
Torula_ligniperda	1.3e-05	4e-06	k__Fungi;p__Ascomycota;c__Dothideomycetes;o__Pleosporales;f__Torulaceae;g__Torula;s__Torula_ligniperda;
Leptoxyphium_sp	0	8e-06	k__Fungi;p__Ascomycota;c__Dothideomycetes;o__Capnodiales;f__Capnodiaceae;g__Leptoxyphium;s__Leptoxyphium_sp;
Apiotrichum_dulcitum	0	8e-06	k__Fungi;p__Basidiomycota;c__Tremellomycetes;o__Trichosporonales;f__Trichosporonaceae;g__Apiotrichum;s__Apiotrichum_dulcitum;
Thelonectria_beijingensis	8e-06	0	k__Fungi;p__Ascomycota;c__Sordariomycetes;o__Hypocreales;f__Nectriaceae;g__Thelonectria;s__Thelonectria_beijingensis;
Ovatospora_brasiliensis	0	8e-06	k__Fungi;p__Ascomycota;c__Sordariomycetes;o__Sordariales;f__Chaetomiaceae;g__Ovatospora;s__Ovatospora_brasiliensis;
Parastagonospora_sp	8e-06	0	k__Fungi;p__Ascomycota;c__Dothideomycetes;o__Pleosporales;f__Phaeosphaeriaceae;g__Parastagonospora;s__Parastagonospora_sp;
Psathyrella_piluliformis	1.3e-05	0	k__Fungi;p__Basidiomycota;c__Agaricomycetes;o__Agaricales;f__Psathyrellaceae;g__Psathyrella;s__Psathyrella_piluliformis;
Penicillium_spinulosum	1.3e-05	1.3e-05	k__Fungi;p__Ascomycota;c__Eurotiomycetes;o__Eurotiales;f__Aspergillaceae;g__Penicillium;s__Penicillium_spinulosum;
Penicillium_dierckxii	0	8e-06	k__Fungi;p__Ascomycota;c__Eurotiomycetes;o__Eurotiales;f__Aspergillaceae;g__Penicillium;s__Penicillium_dierckxii;
Phaeosphaeriaceae_sp	1.3e-05	0	k__Fungi;p__Ascomycota;c__Dothideomycetes;o__Pleosporales;f__Phaeosphaeriaceae;g__unidentified;s__Phaeosphaeriaceae_sp;
Cystodendron_sp	8e-06	0	k__Fungi;p__Ascomycota;c__Leotiomycetes;o__Helotiales;f__Helotiales_fam_Incertae_sedis;g__Cystodendron;s__Cystodendron_sp;
Issatchenkia_orientalis	1.7e-05	0	k__Fungi;p__Ascomycota;c__Saccharomycetes;o__Saccharomycetales;f__Saccharomycetaceae;g__Issatchenkia;s__Issatchenkia_orientalis;
Panaeolus_fimicola	0	1.7e-05	k__Fungi;p__Basidiomycota;c__Agaricomycetes;o__Agaricales;f__Bolbitiaceae;g__Panaeolus;s__Panaeolus_fimicola;
Neocucurbitaria_populi	8e-06	0	k__Fungi;p__Ascomycota;c__Dothideomycetes;o__Pleosporales;f__Cucurbitariaceae;g__Neocucurbitaria;s__Neocucurbitaria_populi;
Acremonium_pteridii	8e-06	1.7e-05	k__Fungi;p__Ascomycota;c__Sordariomycetes;o__Hypocreales;f__Hypocreales_fam_Incertae_sedis;g__Acremonium;s__Acremonium_pteridii;
Rickenella_fibula	0	1.3e-05	k__Fungi;p__Basidiomycota;c__Agaricomycetes;o__Hymenochaetales;f__Rickenellaceae;g__Rickenella;s__Rickenella_fibula;
Phialomyces_sp	0	8e-06	k__Fungi;p__Ascomycota;c__Eurotiomycetes;o__Eurotiales;f__Aspergillaceae;g__Phialomyces;s__Phialomyces_sp;
Penicillium_digitatum	4e-06	8e-06	k__Fungi;p__Ascomycota;c__Eurotiomycetes;o__Eurotiales;f__Aspergillaceae;g__Penicillium;s__Penicillium_digitatum;
Wardomyces_inflatus	0	1.3e-05	k__Fungi;p__Ascomycota;c__Sordariomycetes;o__Microascales;f__Microascales_fam_Incertae_sedis;g__Wardomyces;s__Wardomyces_inflatus;
Gongronella_sp	0	4e-06	k__Fungi;p__Mucoromycota;c__Mucoromycetes;o__Mucorales;f__Cunninghamellaceae;g__Gongronella;s__Gongronella_sp;
Bovista_pusilliformis	0	4e-06	k__Fungi;p__Basidiomycota;c__Agaricomycetes;o__Agaricales;f__Lycoperdaceae;g__Bovista;s__Bovista_pusilliformis;
Hannaella_oryzae	4e-06	4e-06	k__Fungi;p__Basidiomycota;c__Tremellomycetes;o__Tremellales;f__Bulleribasidiaceae;g__Hannaella;s__Hannaella_oryzae;
Erysiphe_viburni	0	4e-06	k__Fungi;p__Ascomycota;c__Leotiomycetes;o__Erysiphales;f__Erysiphaceae;g__Erysiphe;s__Erysiphe_viburni;
Perusta_sp	4e-06	0	k__Fungi;p__Ascomycota;c__Dothideomycetes;o__Dothideales;f__Dothioraceae;g__Perusta;s__Perusta_sp;
Geopyxis_alpina	4e-06	4e-06	k__Fungi;p__Ascomycota;c__Pezizomycetes;o__Pezizales;f__Pyronemataceae;g__Geopyxis;s__Geopyxis_alpina;
Taphrinales_sp	0	4e-06	k__Fungi;p__Ascomycota;c__Taphrinomycetes;o__Taphrinales;f__unidentified_Taphrinales_sp;g__unidentified_Taphrinales_sp;s__Taphrinales_sp;
Camarosporidiella_sp	4e-06	0	k__Fungi;p__Ascomycota;c__Dothideomycetes;o__Pleosporales;f__Camarosporidiellaceae;g__Camarosporidiella;s__Camarosporidiella_sp;
Yarrowia_sp	4e-06	0	k__Fungi;p__Ascomycota;c__Saccharomycetes;o__Saccharomycetales;f__Dipodascaceae;g__Yarrowia;s__Yarrowia_sp;
Geastrum_saccatum	8e-06	0	k__Fungi;p__Basidiomycota;c__Agaricomycetes;o__Geastrales;f__Geastraceae;g__Geastrum;s__Geastrum_saccatum;
Trichothecium_crotocinigenum	4e-06	4e-06	k__Fungi;p__Ascomycota;c__Sordariomycetes;o__Hypocreales;f__Hypocreales_fam_Incertae_sedis;g__Trichothecium;s__Trichothecium_crotocinigenum;
GS21_sp	0	8e-06	k__Fungi;p__Mucoromycota;c__Endogonomycetes;o__GS21;f__unidentified_GS21_sp;g__unidentified_GS21_sp;s__GS21_sp;
Golubevia_pallescens	4e-06	0	k__Fungi;p__Basidiomycota;c__Exobasidiomycetes;o__Golubeviales;f__Golubeviaceae;g__Golubevia;s__Golubevia_pallescens;
Boletales_sp	4e-06	4e-06	k__Fungi;p__Basidiomycota;c__Agaricomycetes;o__Boletales;f__unidentified_Boletales_sp;g__unidentified_Boletales_sp;s__Boletales_sp;
Erysiphe_urticae	4e-06	0	k__Fungi;p__Ascomycota;c__Leotiomycetes;o__Erysiphales;f__Erysiphaceae;g__Erysiphe;s__Erysiphe_urticae;
Psora_rubiformis	8e-06	4e-06	k__Fungi;p__Ascomycota;c__Lecanoromycetes;o__Lecanorales;f__Psoraceae;g__Psora;s__Psora_rubiformis;
Ustilago_esculenta	0	4e-06	k__Fungi;p__Basidiomycota;c__Ustilaginomycetes;o__Ustilaginales;f__Ustilaginaceae;g__Ustilago;s__Ustilago_esculenta;
Mycena_alexandri	4e-06	8e-06	k__Fungi;p__Basidiomycota;c__Agaricomycetes;o__Agaricales;f__Tricholomataceae;g__Mycena;s__Mycena_alexandri;
Alternaria_sp	0	4e-06	k__Fungi;p__Ascomycota;c__Dothideomycetes;o__Pleosporales;f__Pleosporaceae;g__Alternaria;s__Alternaria_sp;
Podoscypha_fulvonitens	0	4e-06	k__Fungi;p__Basidiomycota;c__Agaricomycetes;o__Polyporales;f__Podoscyphaceae;g__Podoscypha;s__Podoscypha_fulvonitens;
Chrysosporium_mephiticum	0	4e-06	k__Fungi;p__Ascomycota;c__Eurotiomycetes;o__Onygenales;f__Onygenales_fam_Incertae_sedis;g__Chrysosporium;s__Chrysosporium_mephiticum;
Crustoderma_sp	8e-06	0	k__Fungi;p__Basidiomycota;c__Agaricomycetes;o__Polyporales;f__Polyporales_fam_Incertae_sedis;g__Crustoderma;s__Crustoderma_sp;
Diutina_catenulata	4e-06	0	k__Fungi;p__Ascomycota;c__Saccharomycetes;o__Saccharomycetales;f__Saccharomycetales_fam_Incertae_sedis;g__Diutina;s__Diutina_catenulata;
Scytalidium_fulvum	0	4e-06	k__Fungi;p__Ascomycota;c__Leotiomycetes;o__Helotiales;f__Helotiaceae;g__Scytalidium;s__Scytalidium_fulvum;
Phoma_laundoniae	0	4e-06	k__Fungi;p__Ascomycota;c__Dothideomycetes;o__Pleosporales;f__Didymellaceae;g__Phoma;s__Phoma_laundoniae;
Glomeromycetes_sp	0	4e-06	k__Fungi;p__Glomeromycota;c__Glomeromycetes;o__unidentified_Glomeromycetes_sp;f__unidentified_Glomeromycetes_sp;g__unidentified_Glomeromycetes_sp;s__Glomeromycetes_sp;
Ophiocordyceps_sinensis	0	4e-06	k__Fungi;p__Ascomycota;c__Sordariomycetes;o__Hypocreales;f__Ophiocordycipitaceae;g__Ophiocordyceps;s__Ophiocordyceps_sinensis;
Godronia_fuliginosa	0	4e-06	k__Fungi;p__Ascomycota;c__Leotiomycetes;o__Helotiales;f__Helotiaceae;g__Godronia;s__Godronia_fuliginosa;
Lentinula_edodes	4e-06	0	k__Fungi;p__Basidiomycota;c__Agaricomycetes;o__Agaricales;f__Omphalotaceae;g__Lentinula;s__Lentinula_edodes;
Microsporum_praecox	4e-06	0	k__Fungi;p__Ascomycota;c__Eurotiomycetes;o__Onygenales;f__Arthrodermataceae;g__Microsporum;s__Microsporum_praecox;
Didymocyrtis_brachylaenae	4e-06	0	k__Fungi;p__Ascomycota;c__Dothideomycetes;o__Pleosporales;f__Phaeosphaeriaceae;g__Didymocyrtis;s__Didymocyrtis_brachylaenae;
Phallus_sp	4e-06	0	k__Fungi;p__Basidiomycota;c__Agaricomycetes;o__Phallales;f__Phallaceae;g__Phallus;s__Phallus_sp;
Pezizales_sp	8e-06	4e-06	k__Fungi;p__Ascomycota;c__Pezizomycetes;o__Pezizales;f__unidentified_Pezizales_sp;g__unidentified_Pezizales_sp;s__Pezizales_sp;
Loreleia_marchantiae	4e-06	0	k__Fungi;p__Basidiomycota;c__Agaricomycetes;o__Hymenochaetales;f__Hymenochaetales_fam_Incertae_sedis;g__Loreleia;s__Loreleia_marchantiae;
Pseudotomentella_sp	0	4e-06	k__Fungi;p__Basidiomycota;c__Agaricomycetes;o__Thelephorales;f__Thelephoraceae;g__Pseudotomentella;s__Pseudotomentella_sp;
Cadophora_sp	0	4e-06	k__Fungi;p__Ascomycota;c__Leotiomycetes;o__Helotiales;f__Helotiales_fam_Incertae_sedis;g__Cadophora;s__Cadophora_sp;
Helicogloea_compressa	0	4e-06	k__Fungi;p__Basidiomycota;c__Atractiellomycetes;o__Atractiellales;f__Atractiellales_fam_Incertae_sedis;g__Helicogloea;s__Helicogloea_compressa;
Farysia_setubalensis	4e-06	0	k__Fungi;p__Basidiomycota;c__Ustilaginomycetes;o__Ustilaginales;f__Ustilaginaceae;g__Farysia;s__Farysia_setubalensis;
Penicillium_chermesinum	0	4e-06	k__Fungi;p__Ascomycota;c__Eurotiomycetes;o__Eurotiales;f__Aspergillaceae;g__Penicillium;s__Penicillium_chermesinum;
Diaporthe_sp	0	4e-06	k__Fungi;p__Ascomycota;c__Sordariomycetes;o__Diaporthales;f__Diaporthaceae;g__Diaporthe;s__Diaporthe_sp;
Phaeotremella_foliacea	4e-06	0	k__Fungi;p__Basidiomycota;c__Tremellomycetes;o__Tremellales;f__Phaeotremellaceae;g__Phaeotremella;s__Phaeotremella_foliacea;
Clonostachys_rogersoniana	8e-06	4e-06	k__Fungi;p__Ascomycota;c__Sordariomycetes;o__Hypocreales;f__Bionectriaceae;g__Clonostachys;s__Clonostachys_rogersoniana;
Hirsutella_subulata	0	4e-06	k__Fungi;p__Ascomycota;c__Sordariomycetes;o__Hypocreales;f__Ophiocordycipitaceae;g__Hirsutella;s__Hirsutella_subulata;
Acrostalagmus_luteoalbus	8e-06	0	k__Fungi;p__Ascomycota;c__Sordariomycetes;o__Glomerellales;f__Plectosphaerellaceae;g__Acrostalagmus;s__Acrostalagmus_luteoalbus;
Wardomyces_sp	4e-06	0	k__Fungi;p__Ascomycota;c__Sordariomycetes;o__Microascales;f__Microascales_fam_Incertae_sedis;g__Wardomyces;s__Wardomyces_sp;
Filobasidium_sp	4e-06	0	k__Fungi;p__Basidiomycota;c__Tremellomycetes;o__Filobasidiales;f__Filobasidiaceae;g__Filobasidium;s__Filobasidium_sp;
Exophiala_equina	4e-06	0	k__Fungi;p__Ascomycota;c__Eurotiomycetes;o__Chaetothyriales;f__Herpotrichiellaceae;g__Exophiala;s__Exophiala_equina;
Acremonium_roseolum	4e-06	0	k__Fungi;p__Ascomycota;c__Sordariomycetes;o__Hypocreales;f__Hypocreales_fam_Incertae_sedis;g__Acremonium;s__Acremonium_roseolum;
Savoryella_longispora	0	4e-06	k__Fungi;p__Ascomycota;c__Sordariomycetes;o__Savoryellales;f__Savoryellaceae;g__Savoryella;s__Savoryella_longispora;
Cephalotrichiella_penicillata	4e-06	0	k__Fungi;p__Ascomycota;c__Sordariomycetes;o__Microascales;f__Microascales_fam_Incertae_sedis;g__Cephalotrichiella;s__Cephalotrichiella_penicillata;
Clonostachys_divergens	4e-06	0	k__Fungi;p__Ascomycota;c__Sordariomycetes;o__Hypocreales;f__Bionectriaceae;g__Clonostachys;s__Clonostachys_divergens;
Xylaria_longipes	4e-06	0	k__Fungi;p__Ascomycota;c__Sordariomycetes;o__Xylariales;f__Xylariaceae;g__Xylaria;s__Xylaria_longipes;
Thielavia_hyrcaniae	0	4e-06	k__Fungi;p__Ascomycota;c__Sordariomycetes;o__Sordariales;f__Chaetomiaceae;g__Thielavia;s__Thielavia_hyrcaniae;
Archaeorhizomyces_finlayi	4e-06	0	k__Fungi;p__Ascomycota;c__Archaeorhizomycetes;o__Archaeorhizomycetales;f__Archaeorhizomycetaceae;g__Archaeorhizomyces;s__Archaeorhizomyces_finlayi;
Paraphysoderma_sedebokerense	4e-06	0	k__Fungi;p__Blastocladiomycota;c__Blastocladiomycetes;o__Blastocladiales;f__Physodermataceae;g__Paraphysoderma;s__Paraphysoderma_sedebokerense;
Meyerozyma_sp	4e-06	0	k__Fungi;p__Ascomycota;c__Saccharomycetes;o__Saccharomycetales;f__Debaryomycetaceae;g__Meyerozyma;s__Meyerozyma_sp;
Melampsora_abietis-populi	4e-06	0	k__Fungi;p__Basidiomycota;c__Pucciniomycetes;o__Pucciniales;f__Melampsoraceae;g__Melampsora;s__Melampsora_abietis-populi;
Pichia_kluyveri	0	4e-06	k__Fungi;p__Ascomycota;c__Saccharomycetes;o__Saccharomycetales;f__Pichiaceae;g__Pichia;s__Pichia_kluyveri;
Chaetomium_unguicola	4e-06	0	k__Fungi;p__Ascomycota;c__Sordariomycetes;o__Sordariales;f__Chaetomiaceae;g__Chaetomium;s__Chaetomium_unguicola;
Inocybe_napipes	4e-06	0	k__Fungi;p__Basidiomycota;c__Agaricomycetes;o__Agaricales;f__Inocybaceae;g__Inocybe;s__Inocybe_napipes;
Microbotryum_silenes-inflatae	4e-06	0	k__Fungi;p__Basidiomycota;c__Microbotryomycetes;o__Microbotryales;f__Microbotryaceae;g__Microbotryum;s__Microbotryum_silenes-inflatae;
Albifimbria_terrestris	4e-06	0	k__Fungi;p__Ascomycota;c__Sordariomycetes;o__Hypocreales;f__Stachybotryaceae;g__Albifimbria;s__Albifimbria_terrestris;
Aspergillus_floccosus	4e-06	4e-06	k__Fungi;p__Ascomycota;c__Eurotiomycetes;o__Eurotiales;f__Aspergillaceae;g__Aspergillus;s__Aspergillus_floccosus;
Phyllachora_sp	4e-06	0	k__Fungi;p__Ascomycota;c__Sordariomycetes;o__Phyllachorales;f__Phyllachoraceae;g__Phyllachora;s__Phyllachora_sp;
Yamadamyces_rosulatus	4e-06	0	k__Fungi;p__Basidiomycota;c__Microbotryomycetes;o__Kriegeriales;f__Kriegeriaceae;g__Yamadamyces;s__Yamadamyces_rosulatus;
Kodamaea_ohmeri	4e-06	0	k__Fungi;p__Ascomycota;c__Saccharomycetes;o__Saccharomycetales;f__Metschnikowiaceae;g__Kodamaea;s__Kodamaea_ohmeri;
Lectera_capsici	4e-06	0	k__Fungi;p__Ascomycota;c__Sordariomycetes;o__Glomerellales;f__Plectosphaerellaceae;g__Lectera;s__Lectera_capsici;
Phaeotremella_sp	4e-06	0	k__Fungi;p__Basidiomycota;c__Tremellomycetes;o__Tremellales;f__Phaeotremellaceae;g__Phaeotremella;s__Phaeotremella_sp;
Cochliobolus_geniculatus	0	4e-06	k__Fungi;p__Ascomycota;c__Dothideomycetes;o__Pleosporales;f__Pleosporaceae;g__Cochliobolus;s__Cochliobolus_geniculatus;
Malassezia_sp	4e-06	0	k__Fungi;p__Basidiomycota;c__Malasseziomycetes;o__Malasseziales;f__Malasseziaceae;g__Malassezia;s__Malassezia_sp;
Podosphaera_lini	4e-06	0	k__Fungi;p__Ascomycota;c__Leotiomycetes;o__Erysiphales;f__Erysiphaceae;g__Podosphaera;s__Podosphaera_lini;
Arthrobotrys_xiangyunensis	0	4e-06	k__Fungi;p__Ascomycota;c__Orbiliomycetes;o__Orbiliales;f__Orbiliaceae;g__Arthrobotrys;s__Arthrobotrys_xiangyunensis;
Paraphoma_sp	8e-06	0	k__Fungi;p__Ascomycota;c__Dothideomycetes;o__Pleosporales;f__Phaeosphaeriaceae;g__Paraphoma;s__Paraphoma_sp;
Xerocomellus_porosporus	4e-06	0	k__Fungi;p__Basidiomycota;c__Agaricomycetes;o__Boletales;f__Boletaceae;g__Xerocomellus;s__Xerocomellus_porosporus;
Xenochalara_juniperi	4e-06	0	k__Fungi;p__Ascomycota;c__Leotiomycetes;o__Helotiales;f__Helotiales_fam_Incertae_sedis;g__Xenochalara;s__Xenochalara_juniperi;
Olpidiaceae_sp	4e-06	0	k__Fungi;p__Olpidiomycota;c__Olpidiomycetes;o__Olpidiales;f__Olpidiaceae;g__unidentified;s__Olpidiaceae_sp;
Stereum_subtomentosum	4e-06	4e-06	k__Fungi;p__Basidiomycota;c__Agaricomycetes;o__Russulales;f__Stereaceae;g__Stereum;s__Stereum_subtomentosum;
Orbilia_leucostigma	0	4e-06	k__Fungi;p__Ascomycota;c__Orbiliomycetes;o__Orbiliales;f__Orbiliaceae;g__Orbilia;s__Orbilia_leucostigma;
Humicola_fuscoatra	4e-06	0	k__Fungi;p__Ascomycota;c__Sordariomycetes;o__Sordariales;f__Chaetomiaceae;g__Humicola;s__Humicola_fuscoatra;
Zopfiella_erostrata	4e-06	0	k__Fungi;p__Ascomycota;c__Sordariomycetes;o__Sordariales;f__Chaetomiaceae;g__Zopfiella;s__Zopfiella_erostrata;
Fusarium_penzigii	4e-06	0	k__Fungi;p__Ascomycota;c__Sordariomycetes;o__Hypocreales;f__Nectriaceae;g__Fusarium;s__Fusarium_penzigii;
Spizellomyces_plurigibbosus	0	4e-06	k__Fungi;p__Chytridiomycota;c__Spizellomycetes;o__Spizellomycetales;f__Spizellomycetaceae;g__Spizellomyces;s__Spizellomyces_plurigibbosus;
Isthmolongispora_ampulliformis	4e-06	0	k__Fungi;p__Ascomycota;c__Pezizomycotina_cls_Incertae_sedis;o__Pezizomycotina_ord_Incertae_sedis;f__Pezizomycotina_fam_Incertae_sedis;g__Isthmolongispora;s__Isthmolongispora_ampulliformis;
Clavicipitaceae_sp	0	4e-06	k__Fungi;p__Ascomycota;c__Sordariomycetes;o__Hypocreales;f__Clavicipitaceae;g__unidentified;s__Clavicipitaceae_sp;
Microascus_croci	0	4e-06	k__Fungi;p__Ascomycota;c__Sordariomycetes;o__Microascales;f__Microascaceae;g__Microascus;s__Microascus_croci;
Acaulospora_scrobiculata	0	4e-06	k__Fungi;p__Glomeromycota;c__Glomeromycetes;o__Diversisporales;f__Acaulosporaceae;g__Acaulospora;s__Acaulospora_scrobiculata;
Pichia_mandshurica	0	4e-06	k__Fungi;p__Ascomycota;c__Saccharomycetes;o__Saccharomycetales;f__Pichiaceae;g__Pichia;s__Pichia_mandshurica;
Parascedosporium_sp	0	4e-06	k__Fungi;p__Ascomycota;c__Sordariomycetes;o__Microascales;f__Microascaceae;g__Parascedosporium;s__Parascedosporium_sp;
Magnaporthiopsis_incrustans	0	4e-06	k__Fungi;p__Ascomycota;c__Sordariomycetes;o__Magnaporthales;f__Magnaporthaceae;g__Magnaporthiopsis;s__Magnaporthiopsis_incrustans;
GS15_sp	0	8e-06	k__Fungi;p__Blastocladiomycota;c__Blastocladiomycetes;o__GS15;f__unidentified_GS15_sp;g__unidentified_GS15_sp;s__GS15_sp;
GS22_sp	4e-06	4e-06	k__Fungi;p__Mucoromycota;c__Endogonomycetes;o__GS22;f__unidentified_GS22_sp;g__unidentified_GS22_sp;s__GS22_sp;
Pichia_terricola	4e-06	0	k__Fungi;p__Ascomycota;c__Saccharomycetes;o__Saccharomycetales;f__Pichiaceae;g__Pichia;s__Pichia_terricola;
Conocybe_sp	4e-06	0	k__Fungi;p__Basidiomycota;c__Agaricomycetes;o__Agaricales;f__Bolbitiaceae;g__Conocybe;s__Conocybe_sp;
Lactifluus_flavellus	8e-06	0	k__Fungi;p__Basidiomycota;c__Agaricomycetes;o__Russulales;f__Russulaceae;g__Lactifluus;s__Lactifluus_flavellus;
Trichoderma_asperellum	0	4e-06	k__Fungi;p__Ascomycota;c__Sordariomycetes;o__Hypocreales;f__Hypocreaceae;g__Trichoderma;s__Trichoderma_asperellum;
Lecanora_vainioi	4e-06	0	k__Fungi;p__Ascomycota;c__Lecanoromycetes;o__Lecanorales;f__Lecanoraceae;g__Lecanora;s__Lecanora_vainioi;
Metapochonia_sp	4e-06	0	k__Fungi;p__Ascomycota;c__Sordariomycetes;o__Hypocreales;f__Clavicipitaceae;g__Metapochonia;s__Metapochonia_sp;
Trematosphaeria_sp	0	4e-06	k__Fungi;p__Ascomycota;c__Dothideomycetes;o__Pleosporales;f__Trematosphaeriaceae;g__Trematosphaeria;s__Trematosphaeria_sp;
Chaetosphaeronema_hispidulum	4e-06	0	k__Fungi;p__Ascomycota;c__Dothideomycetes;o__Pleosporales;f__Phaeosphaeriaceae;g__Chaetosphaeronema;s__Chaetosphaeronema_hispidulum;
Cantharellales_sp	4e-06	0	k__Fungi;p__Basidiomycota;c__Agaricomycetes;o__Cantharellales;f__unidentified_Cantharellales_sp;g__unidentified_Cantharellales_sp;s__Cantharellales_sp;
Saturnispora_saitoi	0	4e-06	k__Fungi;p__Ascomycota;c__Saccharomycetes;o__Saccharomycetales;f__Pichiaceae;g__Saturnispora;s__Saturnispora_saitoi;
Geniculifera_effusa	4e-06	0	k__Fungi;p__Ascomycota;c__Orbiliomycetes;o__Orbiliales;f__Orbiliaceae;g__Geniculifera;s__Geniculifera_effusa;
Botrytis_cinerea	4e-06	4e-06	k__Fungi;p__Ascomycota;c__Leotiomycetes;o__Helotiales;f__Sclerotiniaceae;g__Botrytis;s__Botrytis_cinerea;
Septoglomus_sp	8e-06	0	k__Fungi;p__Glomeromycota;c__Glomeromycetes;o__Glomerales;f__Glomeraceae;g__Septoglomus;s__Septoglomus_sp;
Davidiellomyces_australiensis	0	4e-06	k__Fungi;p__Ascomycota;c__Dothideomycetes;o__Capnodiales;f__Cladosporiaceae;g__Davidiellomyces;s__Davidiellomyces_australiensis;
Sticta_nylanderiana	4e-06	8e-06	k__Fungi;p__Ascomycota;c__Lecanoromycetes;o__Peltigerales;f__Lobariaceae;g__Sticta;s__Sticta_nylanderiana;
Candida_sake	4e-06	4e-06	k__Fungi;p__Ascomycota;c__Saccharomycetes;o__Saccharomycetales;f__Saccharomycetales_fam_Incertae_sedis;g__Candida;s__Candida_sake;
Oculimacula_aestiva	4e-06	4e-06	k__Fungi;p__Ascomycota;c__Leotiomycetes;o__Helotiales;f__Dermateaceae;g__Oculimacula;s__Oculimacula_aestiva;
Sistotrema_eximum	0	4e-06	k__Fungi;p__Basidiomycota;c__Agaricomycetes;o__Cantharellales;f__Cantharellales_fam_Incertae_sedis;g__Sistotrema;s__Sistotrema_eximum;
Melanocarpus_albomyces	4e-06	4e-06	k__Fungi;p__Ascomycota;c__Sordariomycetes;o__Sordariales;f__Chaetomiaceae;g__Melanocarpus;s__Melanocarpus_albomyces;
Phaeosphaeriopsis_agavensis	4e-06	0	k__Fungi;p__Ascomycota;c__Dothideomycetes;o__Pleosporales;f__Phaeosphaeriaceae;g__Phaeosphaeriopsis;s__Phaeosphaeriopsis_agavensis;
Verrucaria_madida	0	4e-06	k__Fungi;p__Ascomycota;c__Eurotiomycetes;o__Verrucariales;f__Verrucariaceae;g__Verrucaria;s__Verrucaria_madida;
Geastraceae_sp	0	8e-06	k__Fungi;p__Basidiomycota;c__Agaricomycetes;o__Geastrales;f__Geastraceae;g__unidentified;s__Geastraceae_sp;
Gautieria_morchelliformis	4e-06	0	k__Fungi;p__Basidiomycota;c__Agaricomycetes;o__Gomphales;f__Gautieriaceae;g__Gautieria;s__Gautieria_morchelliformis;
Pseudotruncatella_bolusanthi	0	4e-06	k__Fungi;p__Ascomycota;c__Sordariomycetes;o__Xylariales;f__Bartaliniaceae;g__Pseudotruncatella;s__Pseudotruncatella_bolusanthi;
Acrocalymma_fici	4e-06	0	k__Fungi;p__Ascomycota;c__Dothideomycetes;o__Pleosporales;f__Morosphaeriaceae;g__Acrocalymma;s__Acrocalymma_fici;
Pseudocercospora_sp	0	0	k__Fungi;p__Ascomycota;c__Dothideomycetes;o__Capnodiales;f__Mycosphaerellaceae;g__Pseudocercospora;s__Pseudocercospora_sp;
Apophysomyces_trapeziformis	0	0	k__Fungi;p__Mucoromycota;c__Mucoromycetes;o__Mucorales;f__Mucoraceae;g__Apophysomyces;s__Apophysomyces_trapeziformis;
Hansfordia_pulvinata	0	0	k__Fungi;p__Ascomycota;c__Sordariomycetes;o__Xylariales;f__Xylariales_fam_Incertae_sedis;g__Hansfordia;s__Hansfordia_pulvinata;
Others	0.122898	0.131049	Others
